# Supplementary material for: Syntheses, Crystal and Electronic Structures of Rhodium and Iridium Pyridine Di-Imine Complexes with O- and S-Donor Ligands: (Hydroxido, Methoxido and Thiolato)
Source: MDPI journal article supplement (doi:10.3390/chemistry5030133), 2023-09-05
Supplement: s1 [file s1]

## Electronic Supporting Information

### Syntheses, Crystal and Electronic Structures of Rhodium and Iridium Pyridine Diimine Complexes with O- and S-donor ligands: (Hydroxido, Methoxido and Thiolato)

Michel Stephan, Max Völker, Matthias Schreyer, Peter Burger\*

Institut für Angewandte und Anorganische Chemie, Fachbereich Chemie,  
Universität Hamburg, Martin-Luther-King-Platz 6, 20146 Hamburg, Germany.

#### Table of Contents

|                                                              |            |
|--------------------------------------------------------------|------------|
| <b>Experimental Details</b>                                  | <b>2</b>   |
| <b>Synthesis of the Starting Materials</b>                   | <b>3</b>   |
| <b>Synthesis of the Complexes</b>                            | <b>6</b>   |
| <b>NMR Spectroscopy</b>                                      | <b>21</b>  |
| <b>IR Spectroscopy</b>                                       | <b>22</b>  |
| <b>X-ray Crystallographic Studies</b>                        | <b>23</b>  |
| <b>CCSD Statistical Analysis of Rh,Ir-O,S Bond Distances</b> | <b>36</b>  |
| <b>Computational Details</b>                                 | <b>37</b>  |
| <b>References</b>                                            | <b>103</b> |

## Experimental Details

All manipulations of the complexes were performed with standard Schlenk techniques or in a dinitrogen filled glovebox. Pentane, hexane, toluene, dichloromethane (DCM) and diethyl ether ( $\text{Et}_2\text{O}$ ) were dried and  $\text{N}_2$ -saturated with a MBraun solvent purification system. Benzene and tetrahydrofuran (THF) were distilled over sodium benzophenone ketyl prior to use. Sodium methoxide was purchased from ABCR and was used as received. Bis(trifluoromethanesulfonyl)imide ( $\text{HNTf}_2$ ) was purchased from TCI and was used as received. Hydrogen 5.0 was purchased from Linde and was used as received. Hydrogen sulfide solution (0.8 M in THF) was purchased from Merck and was used as received.

## Synthesis of the Starting Materials

The following syntheses were performed according to literature procedure:

Di- $\mu$ -chlorotetrakis(cyclooctene)diiridium(I)[1]

Di- $\mu$ -chlorotetraethylene diiridium(I)[1]

Di- $\mu$ -chlorotetraethylene dirhodium(I)[2]

2,6-Dibenzoylpyridine[3]

4-*tert*-Butylphenyllithium[4]

**3**[5]

N2,N2,N6,N6-tetramethylpyridine-2,6-dicarboxamide[6]

"MeL<sub>3</sub>IrCl"[7]

sodium thiomethoxide[8]

sodium thiophenolate[9]

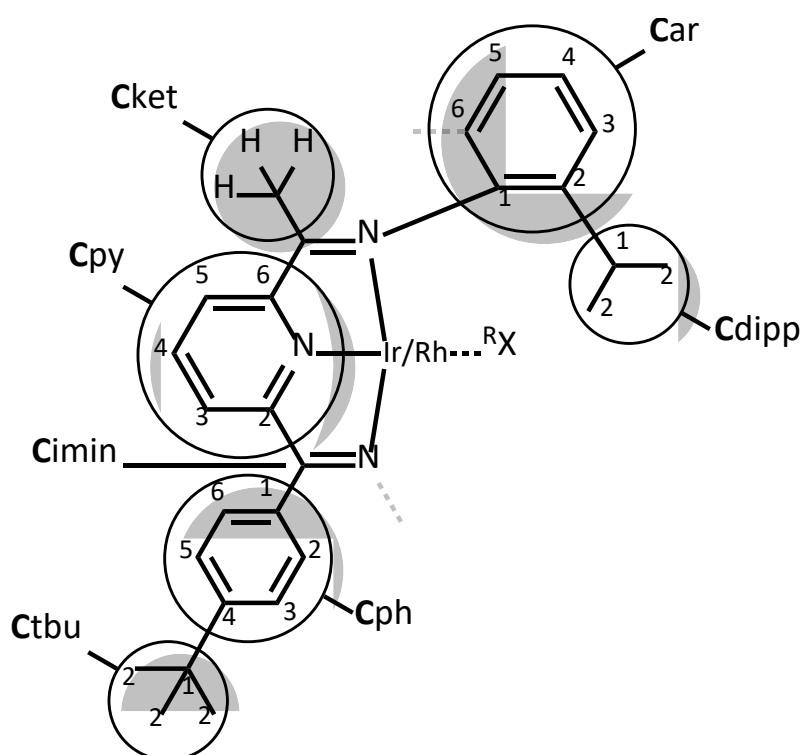

Figure S1: Labeling used for the NMR chemical shifts.



## Synthesis of **2**

5.61 g (14.1 mmol) **1**, 33.0 mL (175 mmol) diisopropylaniline and 250 mg para toluene sulphonic acid (PTSA) were dissolved in 170 mL toluene and heated to reflux with a Dean-Stark apparatus for 72 hours. The cooled suspension was filtered at -30 °C and the solvent was removed. The excess diisopropylaniline was removed by ball tube distillation, and the residue was recrystallized in methanol. 7.91 g (1.01 mmol, 78 %) of **2** were obtained as yellow crystals.

**<sup>1</sup>H-NMR** (400 MHz, DCM-*d*<sub>2</sub>)  $\delta$  [ppm] = 8.36 (m); 8.01 (m); 7.83 (m); 7.66 (m); 7.46 (m); 7.36 (m); 7.25 (m); 7.19 (m); 6.96 (m); 2.88 (m); 1.09 (m).

**<sup>13</sup>C{<sup>1</sup>H}-NMR** (101 MHz, DCM-*d*<sub>2</sub>)  $\delta$  [ppm] = 165.3 (s); 164.1 (s); 163.3 (s); 158.1 (s); 154.7 (s); 154.0 (s); 153.9 (s); 152.8 (s); 152.4 (s); 146.7 (s); 145.9 (s); 136.2 (s); 135.9 (s); 135.5 (s); 135.8 (s); 134.6 (s); 134.4 (s); 131.4 (s); 129.9 (s); 129.8 (s); 129.0 (s); 128.5 (s); 125.4 (s); 125.1 (s); 124.8 (s); 124.3 (s); 124.0 (s); 123.5 (s); 123.0 (s); 122.7 (s); 122.2 (s); 121.7 (s); 34.8 (s); 34.7 (s); 34.6 (s); 34.6 (s); 30.9 (s); 28.3 (s); 28.15 (s); 28.1 (s); 23.6 (s); 23.2 (s); 22.4 (s); 21.9 (s); 21.4 (s); 20.9 (s).

|                                                                             |                                   |
|-----------------------------------------------------------------------------|-----------------------------------|
| <b>CHN</b> (C <sub>51</sub> H <sub>63</sub> N <sub>3</sub> ; 718.09 g/mol): | calc. C, 85.30; H, 8.84; N, 5.85. |
|                                                                             | meas. C, 85.25; H, 8.90; N, 5.94. |

To a solution of 522 mg (727  $\mu\text{mol}$ ) **2** and 20 mL THF, a solution of 141 mg (363  $\mu\text{mol}$ ) di- $\mu$ -chlorotetraethylene dirhodium(I) and 20 mL THF was added. A color change from pale yellow to dark green was observed. The reaction solution was stirred for 2 hours. Then, the reaction mixture was overlaid with 100 mL pentane. Subsequently, the product was crystallized at -35  $^{\circ}\text{C}$  for 72 hours. The product (446 mg, 521  $\mu\text{mol}$ , 72 % yield) was obtained as dark green crystals, which were washed twice with 10 mL pentane and dried in an oil pump vacuum.

**<sup>13</sup>C{<sup>1</sup>H}-NMR** (151 MHz, THF-*d*<sub>8</sub>) δ [ppm] = 169.2 (s, 2C, Cimin); 158.8 (s, 2C, Cpy-2,6); 153.4 (s, 2C, Cph-4); 147.6 (s, 2C, Car-1); 141.6 (s, 4C, Car-2,6); 132.9 (s, 2C, Cph-1); 128.5 (s, 2C, Cpy-3,5); 128.2 (s, 4C, Cph-2,6); 127.0 (s, 2C, Car-4); 126.1 (s, 4C, Cph-3,5); 124.4 (s, 1C, Cpy-4); 123.6 (s, 4C, Car-3,5); 35.8 (s, 2C, Ctbu-1); 31.5 (s, 6C, Ctbu-2); 29.3 (s, 4C, Cdipp-1); 25.2 (s, 4C, Cdipp-2); 23.6 (s, 4C, Cdipp-2).

**CHN** (C<sub>51</sub>H<sub>63</sub>ClN<sub>3</sub>Rh; 856.44 g/mol): calc. C, 71.52; H, 7.41; N, 4.91.  
meas. C, 71.09 H, 7.33; N, 4.93.

## Synthesis of **5**

300 mg (495  $\mu\text{mol}$ ) **3** were dissolved in 10 mL toluene, giving a yellow solution. 140.5 mg (247.6  $\mu\text{mol}$ ) of the di- $\mu$ -chlorotetraethylene diiridium(I) were dissolved in 10 mL toluene, cooled to  $-30\text{ }^{\circ}\text{C}$ , and added to the vigorously stirred yellow solution of the ligand at room temperature. This gave a dark green suspension, with the product partly precipitating from the reaction solution. The solvent was removed under vacuum. The crude product was co-evaporated with pentane three times. The obtained green solid (371 mg, 446  $\mu\text{mol}$ , 90 %) was dried in vacuum.

**$^1\text{H-NMR}$**  (300 MHz,  $\text{THF-}d_8$ ):  $\delta$  [ppm] = 8.62 (t, 6 Hz, 1H, Cpy-4); 7.83 (d, 6 Hz, 2H, Cpy-3,4); 7.69 (dd, 6.3 Hz, 0.78 Hz, 4H, Cph-3,5); 7.57 (tt, 5.6 Hz, 0.96 Hz, 2H, Cph-4); 7.36 (t, 5.9 Hz, 4H, Cph-2,6); 7.05 (m, 6H, Car-3,4,5); 3.15 (sept, 5.2 Hz, 4H, Cdipp-1); 1.01 (d, 5.2 Hz, 12H, Cdipp-2); 0.87 (d, 5.2 Hz, 12H, Cdipp-2).

**$^{13}\text{C}\{^1\text{H}\}\text{-NMR}$**  (75 MHz,  $\text{THF-}d_8$ ):  $\delta$  [ppm] = 175.8 (s, 2C, Cimin); 166.4 (s, 2C, Cpy-2,6); 151.4 (s, 2C, Car-1); 141.9 (s, 4C, Car-2,6); 138.6 (s, 2C, Cph-1); 129.4 (s, 4C, Cph-2,6); 129.3 (s, 2C, Cph-4); 127.7 (s, 4C, Car-3,5); 125.5 (s, 4C, Cph-3,5); 125.3 (s, 2C, Cpy-3,5); 125.0 (s, 1C, Cpy-4); 123.6 (s, 2C, Car-4); 29.0 (s, 4C, Cdipp-1); 25.7 (s, 4C, Cdipp-2); 23.7 (s, 4C, Cdipp-2).





### Synthesis of **6D**

To a solution of 28 mg (33  $\mu\text{mol}$ ) **8** in 10 mL THF, 45 mg (2.3 mmol) degassed deuterium oxide was added. The reaction solution was stirred at RT for 15 hours. A color change from turquoise-green to grass-green was observed. The solvent was removed in an oil pump vacuum, the residue was co-evaporated twice with 2 mL THF, and the solid was dried in an oil pump vacuum. 20 mg (24  $\mu\text{mol}$ , 72 %) of a dark, grass-green solid were obtained as product.

**IR** (ATR-IR)  $\tilde{\nu}$  [ $\text{cm}^{-1}$ ] = 2633 (w, O-D).

## Synthesis of **7**

100 mg (120  $\mu$ mol) of **5** together with an excess of cesium hydroxide monohydrate (400 mg, 2.4 mmol) were transferred into a Schlenk tube equipped with a magnetic stirring bar. 10 mL of THF was added, giving a dark green suspension. The reaction mixture was stirred at 65 °C for 65 hours, upon which a color change from dark green to grass-green was observed. The solvent was removed under oil pump vacuum, and the crude product was extracted three times with toluene. The solvent was evaporated in an oil pump vacuum, yielding the product as a grass-green solid (97 mg, 119  $\mu$ mol, 99 %). Crystallization can be achieved by layering a THF solution of the product with pentane and crystallizing overnight at -35 °C.

**<sup>1</sup>H-NMR** (300 MHz, THF-*d*<sub>8</sub>):  $\delta$  [ppm] = 8.20 (m, 3H, Cpy-3,4,5); 8.05 (s, 1H, Ir-OH); 7.74 (dd, 8.4 Hz, 1.5 Hz, 4H, Cph-3,5); 7.56 (tt, 7.5 Hz, 1.3 Hz, 2H, Cph-4); 7.34 (t, 8.1 Hz, 4H, Cph-2,6); 7.06 (m, 6H, Car-3,4,5); 3.06 (sept, 6.8 Hz, 4H, Cdipp-1); 1.03 (d, 6.9 Hz, 12H, Cdipp-2); 0.86 (d, 6.9 Hz, 12H, Cdipp-2).

**<sup>13</sup>C{<sup>1</sup>H}-NMR** (75 MHz, THF-*d*<sub>8</sub>):  $\delta$  [ppm] = 169.7 (s, 2C, Cimin); 163.5 (s, 2C, Cpy-2,6); 157.3 (s, 6C, Car-1,2,6); 129.5 (s, 2C, Cph-1); 127.9 (s, 4C, Cph-2,6); 127.6 (s, 2C, Cph-4); 126.5 (s, 2C, Car-4); 123.9 (s, 4C, Cph-3,5); 123.3 (s, 2C, Cpy-3,5); 122.5 (s, 4C, Car-3,5); 118.2 (s, 1C, Cpy-4); 27.5 (s, 4C, Cdipp-1); 25.2 (s, 4C, Cdipp-2); 22.9 (s, 4C, Cdipp-2).

## Synthesis of **8**

To a solution of 446 mg (521  $\mu\text{mol}$ ) **4** and 20 mL THF, a solution of 259 mg (4.79 mmol) sodium methoxide and 40 mL methanol was added. A color change from dark green to turquoise-green was observed. The reaction solution was stirred at 60 °C for 15 hours. The solvent was removed in an oil pump vacuum, and the residue was extracted with 120 mL of toluene and filtered over diatomaceous earth. The solvent was removed with an oil pump vacuum. 385 mg (452  $\mu\text{mol}$ , 87 %) of a dark, turquoise-green solid was obtained as product.

**$^1\text{H}$ -NMR** (600 MHz, THF- $d_8$ )  $\delta$  [ppm] = 8.19 (t, 7.9 Hz, 1H, Cpy-4); 7.59 (d, 7.9 Hz, 2H, Cpy-3,5); 7.43 (m, 8H, Cph-2,3,5,6); 7.07 (m, 2H, Car-4); 6.98 (m, 4H, Car-3,5); 3.81 (s, 3H, Rh-OCH<sub>3</sub>); 3.17 (sept, 6.8 Hz, 4H, Cdipp-1); 1.31 (s, 18H, Ctbu-2); 1.00 (d, 6.9 Hz, 12H, Cdipp-2); 0.96 (d, 6.7 Hz, 12H, Cdipp-2).

**$^{13}\text{C}\{^1\text{H}\}$ -NMR** (151 MHz, THF- $d_8$ )  $\delta$  [ppm] = 165.5 (s, 1C, Cimin); 156.8 (s, 2C, Cpy-2,6); 152.4 (s, 2C, Cph-4); 148.1 (s, 2C, Car-1); 141.7 (s, 4C, Car-2,6); 134.4 (s, 2C, Cph-1); 128.0 (s, 2C, Cpy-3,5); 127.6 (s, 4C, Cph-2,6); 126.7 (s, 2C, Car-4); 125.6 (s, 4C, Cph-3,5); 123.5 (s, 4C, Car-3,5); 118.7 (s, 1C, Cpy-4); 59.2 (s, 1C, Rh-OCH<sub>3</sub>); 35.6 (s, 2C, Ctbu-1); 31.4 (s, 6C, Ctbu-2); 29.1 (s, 4C, Cdipp-1); 26.4 (s, 4C, Cdipp-2); 23.0 (s, 4C, Cdipp-2).

|                                                                                 |                                            |
|---------------------------------------------------------------------------------|--------------------------------------------|
| <b>CHNO</b> (C <sub>52</sub> H <sub>66</sub> N <sub>3</sub> ORh; 852.03 g/mol): | calc. C, 73.30; H, 7.81; N, 4.93; O, 1.88. |
|                                                                                 | meas. C, 73.52; H, 7.84; N, 4.58; O, 1.79. |

## Synthesis of **9**

500 mg (600  $\mu$ mol) of **5** together with an excess of 500 (9.3 mmol) mg sodium methoxide are transferred into a Schlenk tube equipped with a magnetic stirring bar. 10 mL of toluene and 20 mL of methanol were added, giving a dark green suspension. The reaction mixture was stirred at 65 °C for 16 hours. No color change is observed. The solvent mixture was removed in an oil pump vacuum. The crude product was extracted with toluene, and the solvent was subsequently evaporated to dryness. This extraction is performed three times. The obtained green solid (487 mg, 588  $\mu$ mol, 98 %) was dried in an oil pump vacuum. Crystallization can be achieved by layering a THF solution of the product with pentane and crystallizing overnight at -35 °C.

**<sup>1</sup>H-NMR** (600 MHz, THF-*d*<sub>8</sub>):  $\delta$  [ppm] = 8.11 (m, 3H, Cpy-3,4,5); 7.70 (d, 7.08 Hz, 4H, Cph-3,5); 7.52 (t, 7.5 Hz, 2H, Cph-4); 7.33 (t, 7.74 Hz, 4H, Cph-2,6); 7.08 (m, 2H, Car-4); 7.02 (m, 4H, Car-3,5); 5.01 (s, 3H, Ir-OCH<sub>3</sub>); 3.05 (sept, 6.8 Hz, 4H, Cdipp-1); 1.02 (d, 6.9 Hz, 12H, Cdipp-2); 0.84 (d, 6.7 Hz, 12H, Cdipp-2).

**<sup>13</sup>C{<sup>1</sup>H}-NMR** (151 MHz, THF-*d*<sub>8</sub>):  $\delta$  [ppm] = 168.6 (s, 2C, Cimin); 162.3 (s, 2C, Cpy-2,6); 152.2 (s, 2C, Car-1); 141.9 (s, 4C, Car-2,6); 140.3 (s, 2C, Cph-1); 128.8 (s, 4C, Cph-2,6); 128.7 (s, 2C, Cph-4); 127.5 (s, 2C, Car-4); 125.2 (s, 4C, Cph-3,5); 124.6 (s, 4C, Cpy-3,5); 123.7 (s, 4C, Car-3,5); 118.7 (s, 1C, Cpy-4); 66.4 (s, 1C, Ir-OCH<sub>3</sub>); 29.0 (s, 4C, Cdipp-1); 25.6 (s, 4C, Cdipp-2); 23.3 (s, 4C, Cdipp-2).

## Synthesis of **10**

To a solution of 52 mg (61  $\mu$ mol) **8** and 4 mL THF, a solution of 21 mg (75  $\mu$ mol) HNTf<sub>2</sub> and 14 mL THF was added. A color change from turquoise-green to curry-yellow was observed. The reaction solution was stirred for 10 minutes. The solvent was removed in an oil pump vacuum, and the residue was dissolved in 2 mL of THF, then overlaid with 6 mL of pentane. The product was then crystallized at -35 °C for 72 hours. The dark crystals were washed twice with 2 mL of pentane and dried in an oil pump vacuum. The product was obtained as dark crystals (80 mg, 61  $\mu$ mol, 100 % yield).

**<sup>1</sup>H-NMR** (600 MHz, THF-*d*<sub>8</sub>)  $\delta$  [ppm] = 8.37 (t, 8.1 Hz, 1H, Cpy-4); 7.72 (d, 8.1 Hz, 2H, Cpy-3,5); 7.47 (m, 8H, Cph-2,6); 7.29 (t, 7.7 Hz, 2H, Car-4); 7.18 (t, 7.8 Hz, 4H, Car-3,5); 3.62 (m, 4H, THF); 3.50 (sept, 6.8 Hz, 4H, Cdipp-1); 1.78 (m, 4H, THF); 1.30 (s, 18H, Ctbu-2); 1.23 (d, 6.8 Hz, 6H, Cdipp-2); 0.92 (d, 6.8 Hz, 6H, Cdipp-2).

**<sup>13</sup>C{<sup>1</sup>H}-NMR** (151 MHz, THF-*d*<sub>8</sub>)  $\delta$  [ppm] = 171.4 (s, 2C, Cimin); 159.2 (s, 2C, Cpy-2,6); 155.3 (s, 2C, Cph-4); 146.6 (s, 2C, Car-1); 141.6 (s, 4C, Car-2,6); 132.0 (s, 1C, Cpy-4); 130.1 (s, 2C, Cpy-3,5); 130.0 (s, 2C, Cph-1); 129.6 (s, 4C, Cph-2,6); 128.9 (s, 2C, Car-4); 126.7 (s, 4C, Cph-3,5); 125.6 (s, 4C, Car-3,5); 68.3 (s, 2C, THF); 35.9 (s, 2C, Ctbu-1); 31.3 (s, 6C, Ctbu-2); 29.9 (s, 4C, Cdipp-1); 26.5 (s, 2C, THF); 24.6 (s, 4C, Cdipp-2); 23.5 (s, 4C, Cdipp-2).

**<sup>19</sup>F-NMR** (565 MHz, THF-*d*<sub>8</sub>)  $\delta$  [ppm] = -79.8 (s, 6F, NTF<sub>2</sub><sup>-</sup>).

**CHN** (C<sub>57</sub>H<sub>71</sub>F<sub>6</sub>N<sub>4</sub>O<sub>5</sub>RhS<sub>2</sub>; 1173.23 g/mol):    calc.    C, 58.35; H, 6.10; N, 4.78; S, 5.47.  
                                                                  meas.    C, 57.88; H, 6.04; N, 5.13; S, 5.13.

## Synthesis of **11**

To 435 mg (524  $\mu\text{mol}$ ) of **9** dissolved in 10 mL toluene, a solution of 142 mg (505  $\mu\text{mol}$ )  $\text{HNTf}_2$  and 5 mL cold toluene were added dropwise under stirring. The reaction mixture is stirred for 10 minutes at room temperature. By adding 10 mL of pentane, precipitation of the product was observed. The liquid was decanted off, and the solid remainder was washed with pentane, then finally dried in an oil pump vacuum. The product was obtained as a glossy solid (550 mg, 495  $\mu\text{mol}$ , 98 %). Crystallization can be achieved by layering a toluene solution of the product with pentane and crystallizing overnight at  $-35\text{ }^\circ\text{C}$ .

**$^1\text{H}$ -NMR** (300 MHz,  $\text{THF-}d_8$ ):  $\delta$  [ppm] = 8.66 (t, 8.1 Hz, 1H, Cpy-4); 7.66 (d, 8.2 Hz, 2H, Cpy-3,5); 7.63-7.58 (m, 6H, Cph-2,4,6); 7.45 (m, 4H, Cph-3,5); 7.34 (m, 1H,  $\text{CH}_3\text{-OH}$ ); 7.28-7.23 (m, 6H, Car-3,4,5); 3.37 (sept, 6.8 Hz, 4H, Cdipp-1); 2.99 (d, 3.9 Hz, 1H,  $\text{CH}_3\text{-OH}$ ); 1.08 (d, 6.9 Hz, 12H, Cdipp-2); 1.00 (d, 6.9 Hz, 12H, Cdipp-2).

**$^{13}\text{C}\{^1\text{H}\}$ -NMR** (75 MHz,  $\text{THF-}d_8$ ):  $\delta$  [ppm] = 179.6 (s, 2C, Cimin); 148.5 (s, 2C, Cpy-2,6); 142.1 (s, 2C, Cph-1); 142.0 (s, 6C, Car-1,2,6); 127.0 (s, 4C, Cph-2,6); 130.1 (s, 2C, Cph-4); 129.9 (s, 4C, Cph-3,5); 129.7 (s, 2C, Car-4); 129.6 (s, 1C, Cpy-4); 127.6 (s, 2C, Cpy-3,5); 125.8 (s, 4C, Car-3,5); 58.4 (s, 1C,  $\text{CH}_3\text{-OH}$ ); 29.5 (s, 4C, Cdipp-1); 25.88 (s, 4C, Cdipp-2); 23.2 (s, 4C, Cdipp-2).

**$^1\text{H}$ -NMR** (600 MHz,  $\text{C}_6\text{D}_6$ ):  $\delta$  [ppm] = 7.76 (t, 8.0 Hz, 1H, Cpy-4); 7.29 (m, 4H, Cph-2,6); 7.21 (t, 7.8 Hz, 2H, Car-4); 7.09 (d, 7.8 Hz, 4H, Car-3,5); 7.04 (m, 2H, Cph-4); 7.01 (d, 8.0 Hz, 2H, Cpy-3,5); 6.92 (m, 4H, Cph-3,5); 6.21 (q, 4.3 Hz, 1H,  $\text{CH}_3\text{-OH}$ ); 3.21 (sept, 6.8 Hz, 4H, Cdipp-1); 3.16 (d, 4.0 Hz, 3H,  $\text{CH}_3\text{-OH}$ ); 1.03 (d, 6.8 Hz, 12H, Cdipp-2); 0.95 (d, 6.8 Hz, 12H, Cdipp-2).

**$^{19}\text{F}$ -NMR** (594 MHz,  $\text{C}_6\text{D}_6$ ):  $\delta$  [ppm] = -78.4 (s, 6F,  $\text{NTF}_2^-$ ).

$\text{C}_{46}\text{H}_{51}\text{F}_6\text{IrN}_3\text{O}_5\text{S}_2$  (1110.26 g/mol): calcd. C, 49.76; H, 4.63; N, 5.05; S, 5.78;  
meas. C, 49.65; H, 4.55; N, 5.02; S, 5.75.

## Synthesis of **12**

To 179 mg (220  $\mu$ mol) of **7** dissolved in 15 mL toluene, 61 mg (217  $\mu$ mol) HNTf<sub>2</sub> in 5 mL cold toluene were added dropwise under stirring. The reaction mixture was stirred for 10 minutes at room temperature, then 10 mL of pentane was added, which led to the precipitation of the product. The solvent was removed in an oil pump vacuum, and the residue was washed with pentane and dried in an oil pump vacuum. The product is obtained as a blue-green, glossy solid (220 mg, 201  $\mu$ mol, 93 %). Crystallization can be achieved by layering a THF solution of the product with pentane and crystallizing overnight at -35 °C.

**<sup>1</sup>H-NMR** (300 MHz, THF-*d*<sub>8</sub>):  $\delta$  [ppm] = 8.68 (t, 8.1 Hz, 1H, Cpy-4); 8.41 (s, 2H, Ir-OH<sub>2</sub>); 7.68 (d, 8.0 Hz, 2H, Cpy-3,5); 7.62-7.57 (m, 6H, Cph-2,4,6); 7.24 (m, 6H, Car-3,4,5); 7.43 (m, 4H, Cph-3,5); 3.37 (sept, 6.8 Hz, 4H, Cdipp-1); 1.10 (d, 6.7 Hz, 12H, Cdipp-2); 1.00 (d, 6.7 Hz, 12H, Cdipp-2).

**<sup>1</sup>H-NMR** (300 MHz, C<sub>6</sub>D<sub>6</sub>):  $\delta$  [ppm] = 7.78 (s, 2H, Ir-OH<sub>2</sub>); 7.71 (t, 8.0 Hz, 1H, Cpy-4); 7.26 (m, 6H, Cph-2,6, Car-4); 7.11 (d, 7.4 Hz, 4H, Car-3,5); 7.05 (tt, 7.5 Hz, 1.8 Hz, 2H, Cph-4); 7.00 (d, 8.0 Hz, 2H, Cpy-3,5); 6.87 (m, 4H, Cph-3,5); 3.19 (sept, 6.8 Hz, 4H, Cdipp-1); 1.11 (d, 6.8 Hz, 12H, Cdipp-2,3); 0.94 (d, 6.8 Hz, 12H, Cdipp-2).

**<sup>13</sup>C{<sup>1</sup>H}-NMR** (75 MHz, C<sub>6</sub>D<sub>6</sub>):  $\delta$  [ppm] = 179.9 (s, 2C, Cimin); 156.2 (s, 2C, Cpy-2,6); 137.4 (s, 2C, Cph-1); 130.5 (s, 6C, Car-1,2,6); 128.6 (s, 2C, Cph-4); 128.3 (s, 1C, Cpy-4); 127.3 (s, 4C, Cph-3,5); 125.7 (s, 4C, Cph-2,6); 125.2 (s, 2C, Car-4); 127.6 (s, 4C, Cpy-3,5); 124.7 (s, 4C, Car-3,5); 28.6 (s, 4C, Cdipp-1); 25.64 (s, 4C, Cdipp-2); 22.8 (s, 4C, Cdipp-2).

**<sup>19</sup>F-NMR** (594 MHz, C<sub>6</sub>D<sub>6</sub>):  $\delta$  [ppm] = -78.4 (s, 6F, NTF<sub>2</sub><sup>-</sup>).

C<sub>45</sub>H<sub>49</sub>F<sub>6</sub>IrN<sub>4</sub>O<sub>5</sub>S<sub>2</sub> (1096.24 g/mol): calcd. C, 49.30; H, 4.51; N, 5.11; S, 5.85;  
meas. C, 49.31; H, 4.47; N, 4.95; S 6.02.

## Synthesis of **13**

306 mg (276  $\mu$ mol) of **11** were dissolved in 15 mL THF and stirred at room temperature for 5 min. The solvent was removed in an oil pump vacuum, redissolved in 10 mL of THF, and stirred for 4 minutes. This procedure is repeated two more times. The product **13** was obtained as a green, glossy solid (314 mg, 273  $\mu$ mol, 99 %) after drying in an oil pump vacuum. Crystallization can be achieved by layering a THF solution of the product with pentane and crystallizing overnight at -35 °C.

**$^1\text{H}$ -NMR** (300 MHz, THF- $d_8$ ):  $\delta$  [ppm] = 8.61 (t, 8.1 Hz, 1H, Cpy-4); 7.72 (d, 8.1 Hz, 2H, Cpy-3,5); 7.64 (m, 6H, Cph-2,4,6); 7.47 (t, 8.3 Hz, 4H, Cph-3,5); 7.35-7.25 (m, 6 H, Car-3,4,5,); 3.38 (sept, 6.9 Hz, 4H, Cdipp-1); 3.13 (m, 4H, THF); 1.48 (m, 2H, THF); 1.05 (d, 6.8 Hz, 12H, Cdipp-2); 0.99 (d, 6.8 Hz, 12H, Cdipp-2).

**$^{13}\text{C}\{^1\text{H}\}$ -NMR** (75 MHz, THF- $d_8$ ):  $\delta$  [ppm] = 180.2 (s, 2C; Cimin); 165.6 (s, 2C, Cpy-2,6); 150.1 (s, 2C, Car-1); 142.1 (s, 4C, Car-2,6); 134.7 (s, 2C, Cph-1); 131.0 (s, 2C, Cph-4); 129.7 (s, 2C, Car-4); 130.1 (s, 4C, Cph-3,5); 127.7 (s, 8C, Cpy-3,5, Cph-2,6); 126.0 (s, 2C, Car-3,5); 132.1 (s, 1C, Cpy-4); 30.0 (s, 4C, Cdipp-1); 25.2 (s, 4C, Cdipp-2); 23.7 (s, 4C, Cdipp-2).

**$^{19}\text{F}$ -NMR** (564 MHz, THF- $d_8$ ):  $\delta$  [ppm] = -79.8 (s, 6F, NTF $_2^-$ ).

C<sub>49</sub>H<sub>54</sub>F<sub>6</sub>IrN<sub>4</sub>O<sub>5</sub>S<sub>2</sub> (1149.32 g/mol): cald. C, 51.21; H, 4.74; N, 4.87; S, 5.58;  
meas. C, 51.39; H, 5.10; N, 4.67; S, 5.52.



## Synthesis of **14**

To 100 mg (120  $\mu$ mol) of **5** dissolved in 10 mL THF, 120 mg (1.5 mmol) sodium thiomethoxide was added under vigorous stirring, followed by a rapid color change from dark green to deep violet. The reaction mixture was stirred for 3 hours at room temperature, then the solvent was removed in an oil pump vacuum. The crude product was extracted with toluene. The solvent was evaporated and extracted once more with toluene. This extraction procedure was repeated once. The obtained dark solid (99 mg, 117  $\mu$ mol, 98 %) was dried in an oil pump vacuum. Crystallization can be achieved by layering a THF solution of the product with pentane and crystallizing overnight at -35 °C.

**<sup>1</sup>H-NMR** (600 MHz, THF-*d*<sub>8</sub>)  $\delta$  [ppm] = 8.30 (t, 7.8 Hz, 1H, Cpy-4); 8.24 (d, 7.7 Hz, 1H, Cpy-3); 8.16 (d, 7.7 Hz, 1H, Cpy-5); 7.66 (m, 4H, Cph-3,5); 7.51 (m, 2H, Cph-4); 7.30 (m, 4H, Cph-2,6); 7.20-7.10 (m, 4H, Car-3,4); 6.97 (m, 2H, Car-5); 3.04 (sept, 6.8 Hz, 2H, Cdipp-1); 2.99 (sept, 6.8 Hz, 2H, Cdipp-1); 2.65 (s, 3H, Ir-SCH<sub>3</sub>); 1.02 (m, 12H, Cdipp-2); 0.93 (d, 6.8 Hz, 6H, Cdipp-2); 0.91 (d, 6.6 Hz, 6H, Cdipp-2).

**<sup>13</sup>C{<sup>1</sup>H}-NMR** (151 MHz, Tol-*d*<sub>8</sub>)  $\delta$  [ppm] = 170.5 (s, 2C, Cimin); 155.5 (s, 2C, Cpy-2,6); 139.9 (s, 6C, Car-1,2,6); 136.4 (s, 2C, Cph-1); 128.9 (s, 4C, Cph-2,6); 128.6 (s, 2C, Cph-4); 126.5 (s, 2C, Car-4); 125.8 (s, 4C, Cph-3,5); 125.0 (s, 1C, Cpy-5); 124.7 (s, 1C, Cpy-3); 122.5 (s, 4C, Car-3,5); 120.6 (s, 1C, Cpy-4); 28.7 (s, 2C, Cdipp-1); 28.6 (s, 2C, Cdipp-1); 26.4 (s, 2C, Cdipp-2); 24.5 (s, 2C, Cdipp-2); 24.1 (s, 2C, Cdipp-2); 23.6 (s, 2C, Cdipp-2); 19.7 (s, 1C, Ir-SCH<sub>3</sub>).

**<sup>1</sup>H-NMR** (300 MHz, THF-*d*<sub>8</sub>)  $\delta$  [ppm] = 8.30-8.20 (m, 2H, Cpy-4,5); 8.15 (d, 7.8 Hz, 1H, Cpy-3); 7.66 (m, 4H, Cph-3,5); 7.51 (m, 2H, Cph-4); 7.30 (m, 4H, Cph-2,6); 7.20-6.96 (m, 6H, Car-3,4,5); 3.01 (sept, 6.8 Hz, 4H, Cdipp-1); 2.65 (s, 3H, Ir-SCH<sub>3</sub>); 1.02 (m, 12H, Cdipp-2); 0.92 (d, 6.8 Hz, 12H, Cdipp-2).

## Synthesis of **15**

Under vigorous stirring, an excess of 150 mg (1.13 mmol) sodium thiophenolate is added to a solution of 150 mg (180  $\mu$ mol) of **5** in 10 mL THF. The reaction mixture was stirred overnight at room temperature, and a color change from dark green over black to violet was observed. The volatile compounds were removed in an oil pump vacuum. The crude product was extracted with toluene. The solvent was evaporated and extracted once more with toluene. This extraction procedure was repeated once. The product was obtained as a dark solid (147 mg, 162  $\mu$ mol, 90 %) upon drying in an oil pump vacuum. Crystallization can be achieved by layering a THF solution of the product with pentane and crystallizing overnight at -35 °C.

**<sup>1</sup>H-NMR** (300 MHz, THF-*d*<sub>8</sub>):  $\delta$  [ppm] = 8.41 (t, 8.0 Hz, 1H, Cpy-4); 8.10 (d, 8.0 Hz, 2H, Cpy-3,5); 7.60 (m, 4H, Cph-2,6); 7.50 (m, 2H, Cph-4); 7.28 (m, 4H, Cph-3,5); 7.01 (m, 2H, Car-4); 6.90 (m, 4H, Car-3,5); 6.66 (m, 2H, IrSC-2,6); 6.61 (m, 1H, IrSC-4); 6.56 (m, 2H, IrSC-3,5); 3.13 (sept, 6.8 Hz, 4H, Cdipp-1); 1.03 (d, 6.8 Hz, 12H, Cdipp-2); 0.90 (d, 6.8 Hz, 12H, Cdipp-2).

**<sup>13</sup>C{<sup>1</sup>H}-NMR** (75 MHz, THF-*d*<sub>8</sub>):  $\delta$  [ppm] = 169.1 (s, 2C, Cimin); 158.0 (s, 2C, Cpy-2,6); 151.9 (s, 1C, Car-1, IrSC-1); 141.3 (s, 4C, Car-2,6); 139.7 (s, 2C, Cph-1); 135.4 (s, 2C, IrSC-3,5); 128.9 (s, 4C, Cph-3,5); 128.7 (s, 2C, IrSC-2,6); 128.6 (s, 2C, Cph-4); 127.9 (s, 2C, Car-4); 126.0 (s, 4C, Cph-2,6); 125.4 (s, 2C, Cpy-3,5); 124.1 (s, 1C, IrSC-4); 123.7 (s, 4C, Car-3,5); 121.7 (s, 1C, Cpy-4); 28.9 (s, 4C, Cdipp-1); 25.6 (s, 4C, Cdipp-2); 24.0 (s, 4C, Cdipp-2).

## Synthesis of **16**

To 250 mg (302  $\mu$ mol) of **9** dissolved in 10 mL THF, 900  $\mu$ L (720  $\mu$ mol) of an 0.8 M hydrogen sulfide solution in THF was added under vigorous stirring, and an immediate color change from dark green to dark violet, almost black, was observed. The reaction mixture was stirred at RT for one hour, and then the solvent was removed in an oil pump vacuum. The obtained dark solid (246 mg, 296  $\mu$ mol, 98 %) was thoroughly dried in an oil pump vacuum for several hours. Crystallization can be achieved by layering a THF solution of the product with pentane and crystallizing overnight at -35 °C.

**$^1\text{H-NMR}$**  (600 MHz, Tol- $d_8$ ):  $\delta$  [ppm] = 7.95 (m, 3H, Cpy-3,4,5); 7.55 (dd, 8.5 Hz, 1.4 Hz, 4H, Cph-2,6); 7.15 (tt, 7.4 Hz, 1.3 Hz, 2H, Cph-4); 6.95 (t, 7.5 Hz, 4H, Cph-3,5); 7.03 (m, 6H, Car-3,4,5); 5.57 (s, 1H, Ir-SH); 3.21 (sept, 6.8 Hz, 4H, Cdipp-1); 1.2 (d, 6.7 Hz, 12H, Cdipp-2); 1.0 (d, 6.7 Hz, 12H, Cdipp-2).

**$^{13}\text{C}\{^1\text{H}\}\text{-NMR}$**  (151 MHz, Tol- $d_8$ ):  $\delta$  [ppm] = 168.4 (s, 2C, Cimin); 158.3 (s, 2C, Cpy-2,6); 141.0 (s, 6C, Car-1,2,6); 139.2 (s, 2C, Cph-1); 127.9 (s, 2C, Cph-4); 127.4 (s, 2C, Car-4); 128.3 (s, 4C, Cph-3,5); 124.5 (s, 4C, Cph-2,6); 123.9 (s, 2C, Cpy-3,5); 123.0 (s, 4C, Car-3,5); 120.6 (s, 1C, Cpy-4); 28.0 (s, 4C, Cdipp-1); 25.7 (s, 4C, Cdipp-2); 23.6 (s, 4C, Cdipp-2).

**$^1\text{H-NMR}$**  (300 MHz, THF- $d_8$ ):  $\delta$  [ppm] = 8.51 (t, 7.9 Hz, 1H, Cpy-4); 8.18 (d, 7.9 Hz, 2H, Cpy-3,5); 7.72 (dd, 8.2 Hz, 1.5 Hz, 4H, Cph-3,5); 7.55 (tt, 7.6 Hz, 1.3 Hz, 2H, Cph-4); 7.32 (t, 7.6 Hz, 4H, Cph-2,6); 7.06 (m, 6 H, Car-3,4,5); 4.87 (s, 1H, Ir-SH); 3.06 (sept, 6.8 Hz, 4H, Cdipp-1); 0.97 (d, 3.6 Hz, 12H, Cdipp-2); 0.94 (d, 3.6 Hz, 12H, Cdipp-2).

Synthesis of **18**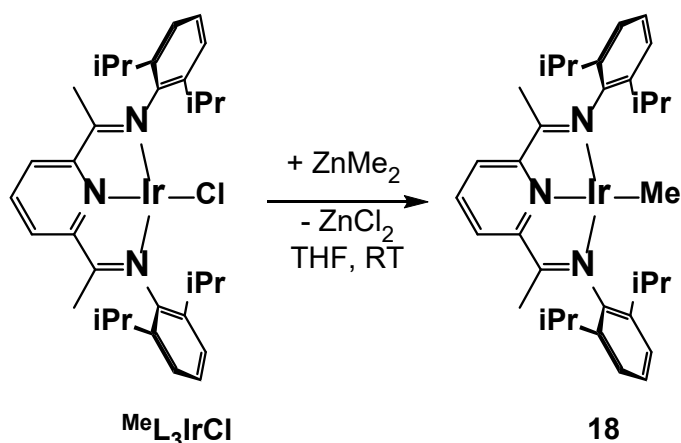

600  $\mu\text{L}$  (720  $\mu\text{mol}$ ) of a 1.2 molar solution of dimethylzinc in toluene was added to a solution of 0.57 g (0.80 mmol) of  $\text{MeL}_3\text{IrCl}$  in 6 mL THF under stirring. After 7 hours, a conversion of 78 % was observed by  $^1\text{H}$  NMR spectroscopy. The reaction mixture was stirred at room temperature for 24 hours and filtrated. The reaction solution was then concentrated to one half in an oil pump vacuum, and the product was crystallized at  $-30\text{ }^\circ\text{C}$ . The crystalline solid was washed three times with 2 mL of  $\text{Et}_2\text{O}$  and dried in an oil pump vacuum. Single crystals suitable for X-ray structural analysis could be obtained from a saturated solution of **18** in *n*-hexane at  $-30\text{ }^\circ\text{C}$ .

**$^1\text{H}$ -NMR** (300 MHz,  $\text{THF-}d_8$ ):  $\delta$  [ppm] = 8.97 (t, 7.9 Hz, 1H, Cpy-4); 8.40 (d, 7.9 Hz, 2H, Cpy-3,5); 7.33-7.16 (m, 6H, Car-3,4,5); 7.04 (s, 3H, Ir-CH<sub>3</sub>); 2.94 (sept, 6.8 Hz, 4H, Cdipp-1); 1.13 (d, 6.8 Hz, 12H, Cdipp-2); 0.69 (d, 6.8 Hz, 12H, Cdipp-2); 0.33 (s, 6H, Cket).

**$^{13}\text{C}\{^1\text{H}\}$ -NMR** (75 MHz,  $\text{THF-}d_8$ ):  $\delta$  [ppm] = 171.5 (s, 2C, Cimin); 164.5 (s, 2C, Cpy-2,6); 153.5 (s, 2C, Car-1); 141.5 (s, 4C, Car-2,6); 127.2 (s, 2C, Car-4); 123.9 (s, 4C, Car-3,5); 124.5 (s, 2C, Cpy-4); 121.1 (s, 4C, Cpy-3,5); 28.5 (s, 4C, Cdipp-1); 24.4 (s, 4C, Cdipp-2); 24.3 (s, 4C, Cdipp-2); 22.5 (s, 2C, Cket); 3.9 (s, 1C, Ir-CH<sub>3</sub>).

## NMR Spectroscopy

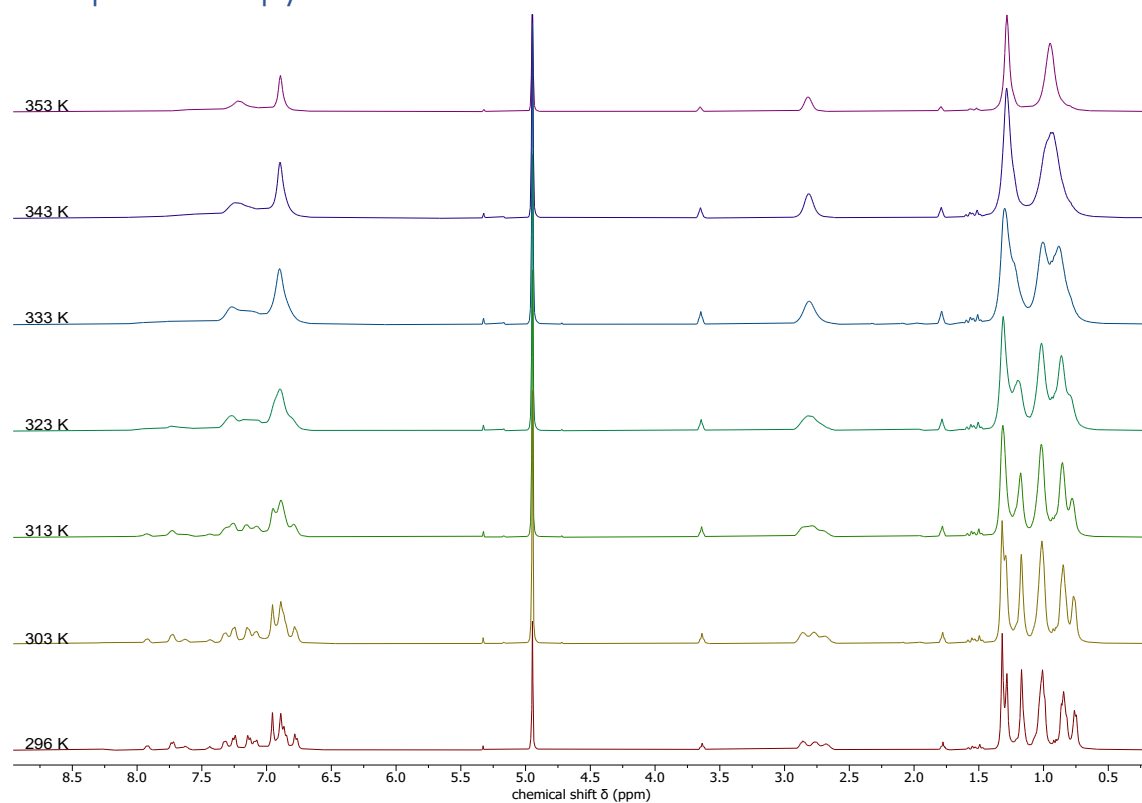

Figure S2:  $^1\text{H}$  NMR spectra of **2** in  $\text{dibromomethane-d}_2$  between 296 K and 353 K.

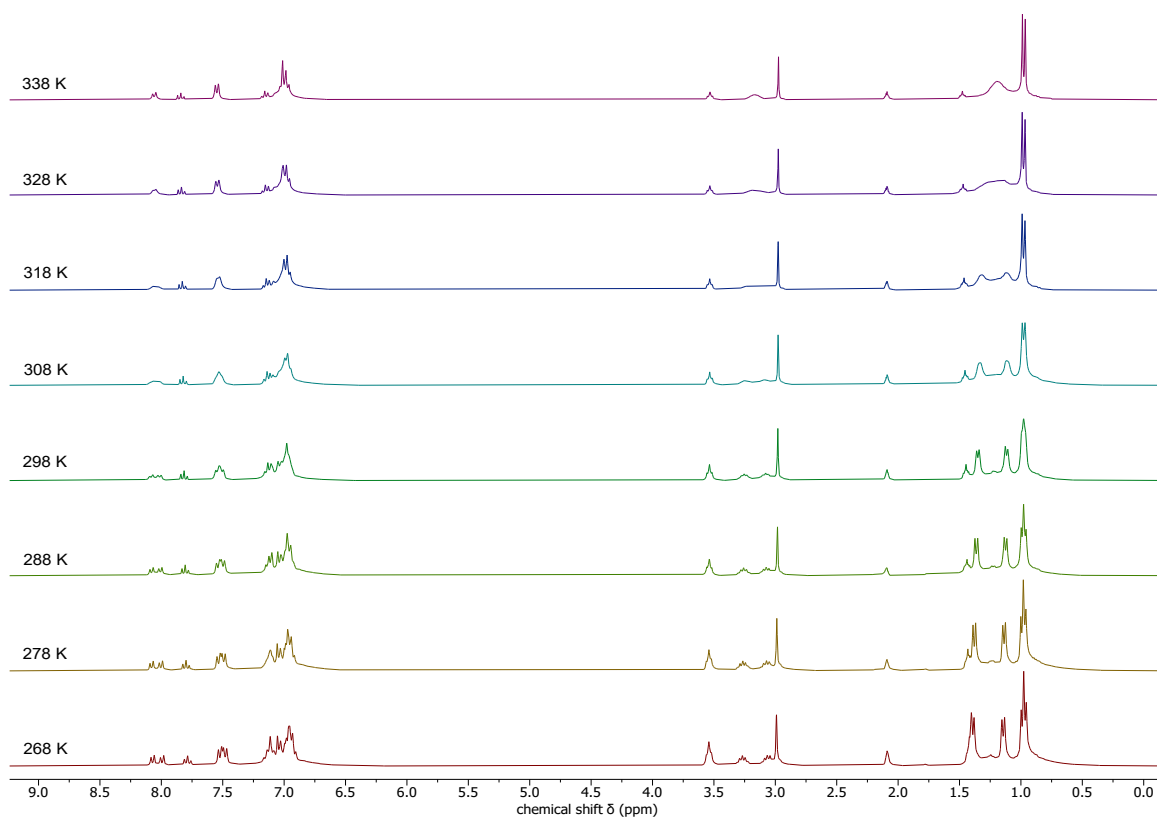

Figure S3:  $^1\text{H}$  NMR spectra of **14** in  $\text{toluene-d}_8$  between 268 K and 338 K.

## IR Spectroscopy

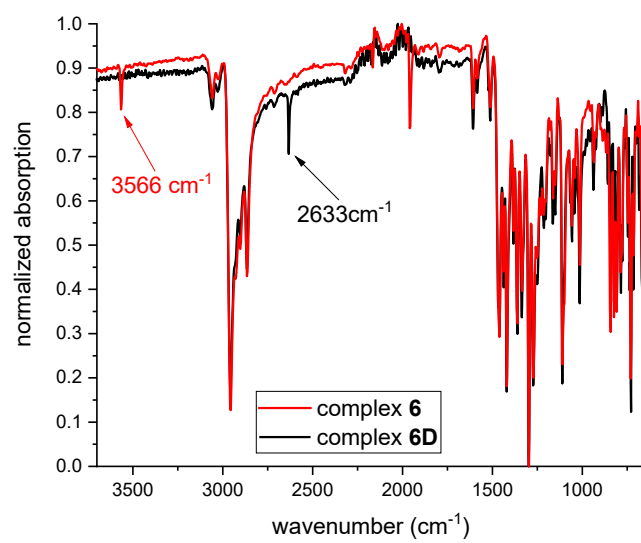

Figure S4: ATR-IR spectra of **6** (Rh-OH) and the deuterio isotopologue **6D** (Rh-OD).

## X-ray Crystallographic Studies

Single X-ray crystal measurements were performed using a BRUKER AXS SMART APEX single crystal diffractometer with graphite monochromatic MoK $\alpha$  radiation ( $\lambda = 0.71073 \text{ \AA}$ ) or an Oxford Diffractometer Supernova from AGILENT TECHNOLOGIES equipped with CuK $\alpha$  and a MoK $\alpha$  radiation sources at 100 K. The single crystals were mounted in high viscosity polybutene oil on a glass fibre of the goniometer head. Data were analysed using the software packages saint and sadabs (BRUKER) and ChrysAlis Pro (OXFORD DIFFRACTION). The structures were solved and refined with the Shelx[10] and Olex2[11] program packages. All atoms were refined anisotropically except for the hydrogen atoms.

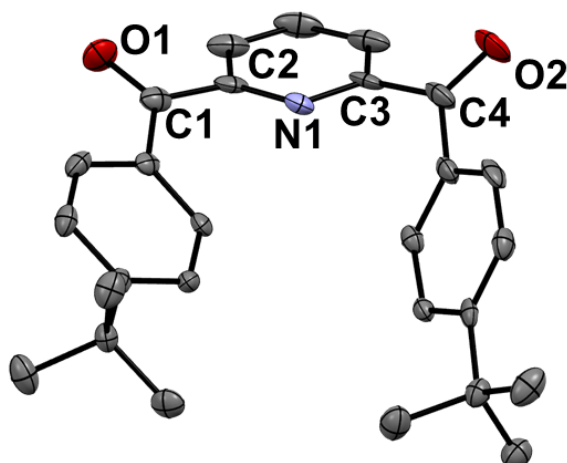

Figure S5: Ortep diagram of the molecular structure of **1**. Hydrogen atoms are omitted for clarity, ellipsoids are shown at the 50% probability level.

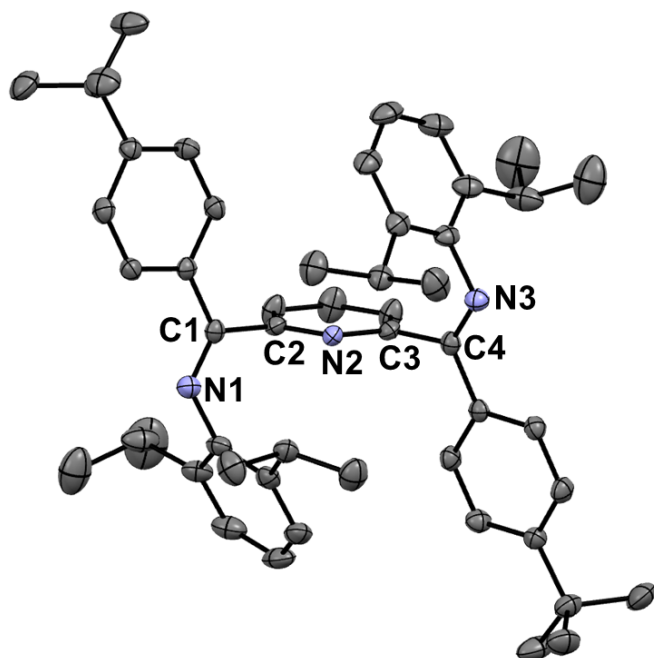

Figure S6: Ortep diagram of the molecular structure of **2**. Hydrogen atoms and solvent molecules are omitted for clarity, ellipsoids are shown at the 50% probability level.

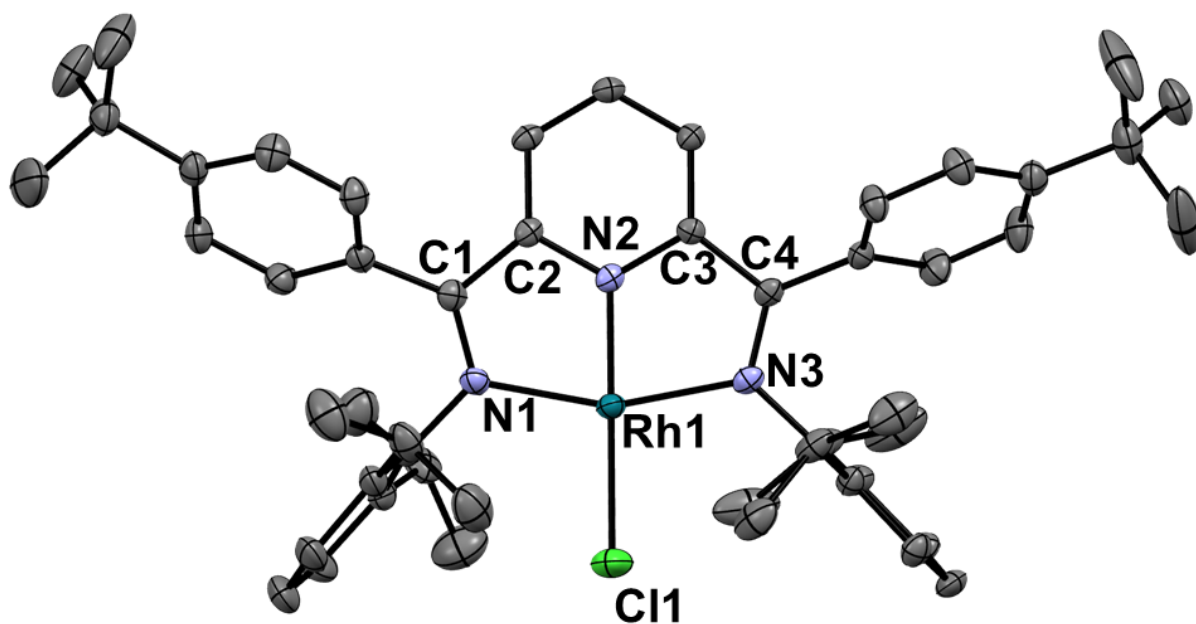

Figure S7: Ortep diagram of the molecular structure of **4**. Hydrogen atoms and solvent molecules are omitted for clarity, ellipsoids are shown at the 50% probability level.

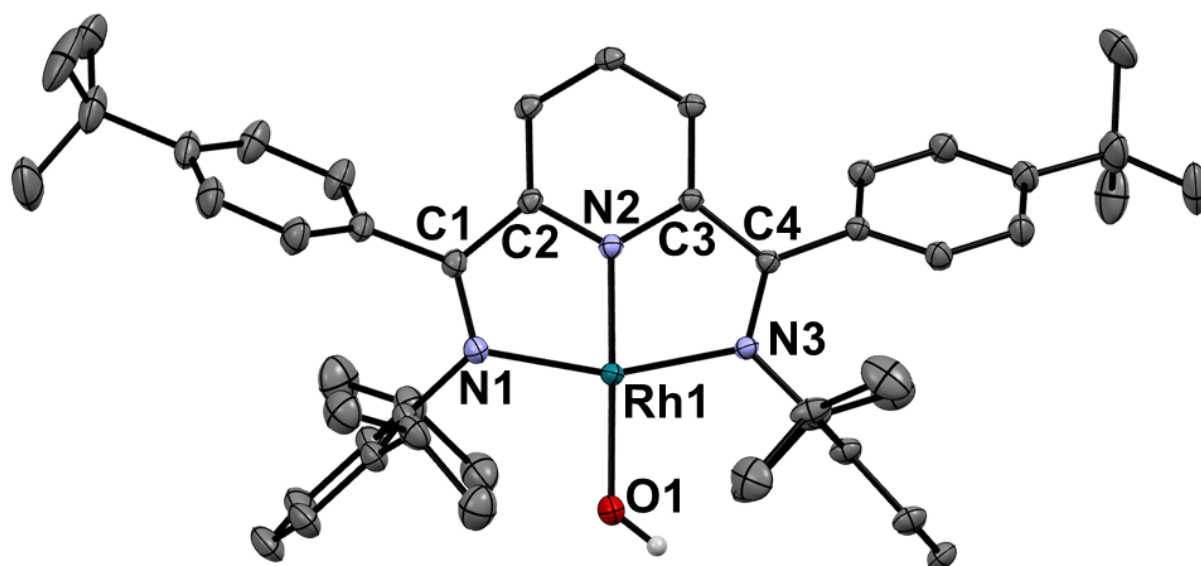

Figure S8: Ortep diagram of the molecular structure of **6**. Hydrogen atoms with exception of the OH group and solvent molecules are omitted for clarity, ellipsoids are shown at the 50% probability level.



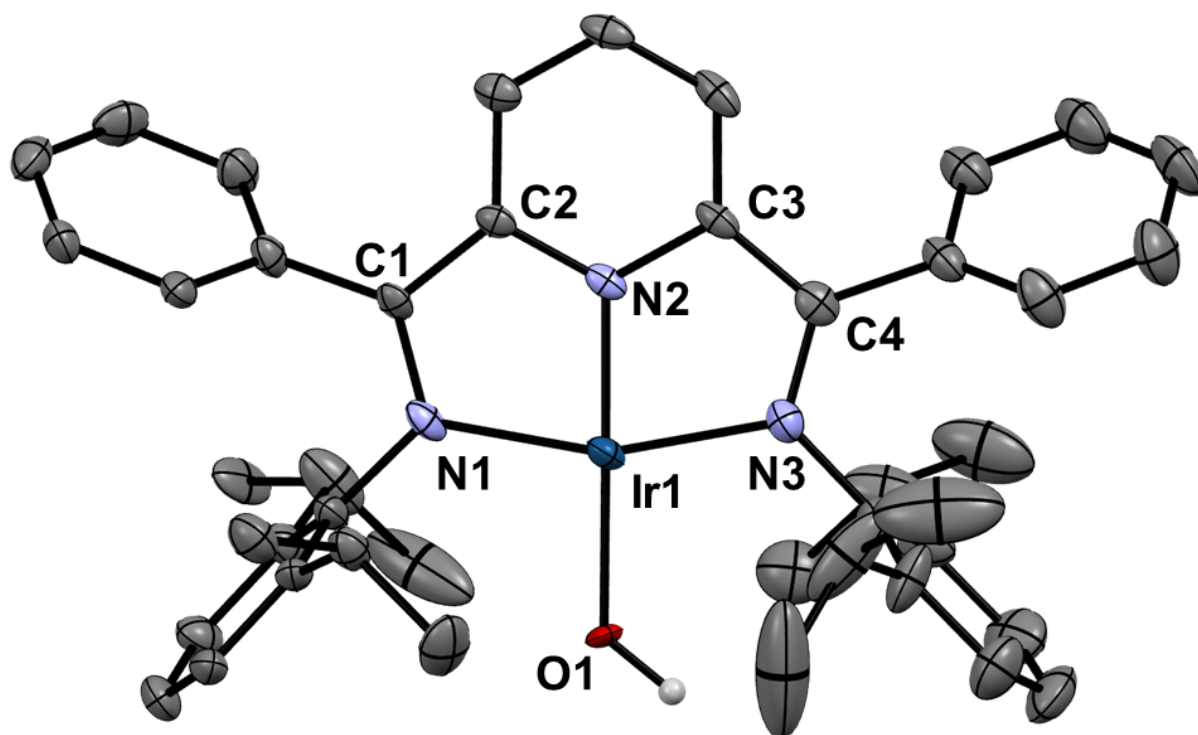

Figure S9: Ortep diagram of the molecular structure of **7**. Hydrogen atoms with exception of the OH group and solvent molecules are omitted for clarity, ellipsoids are shown at the 50% probability level.

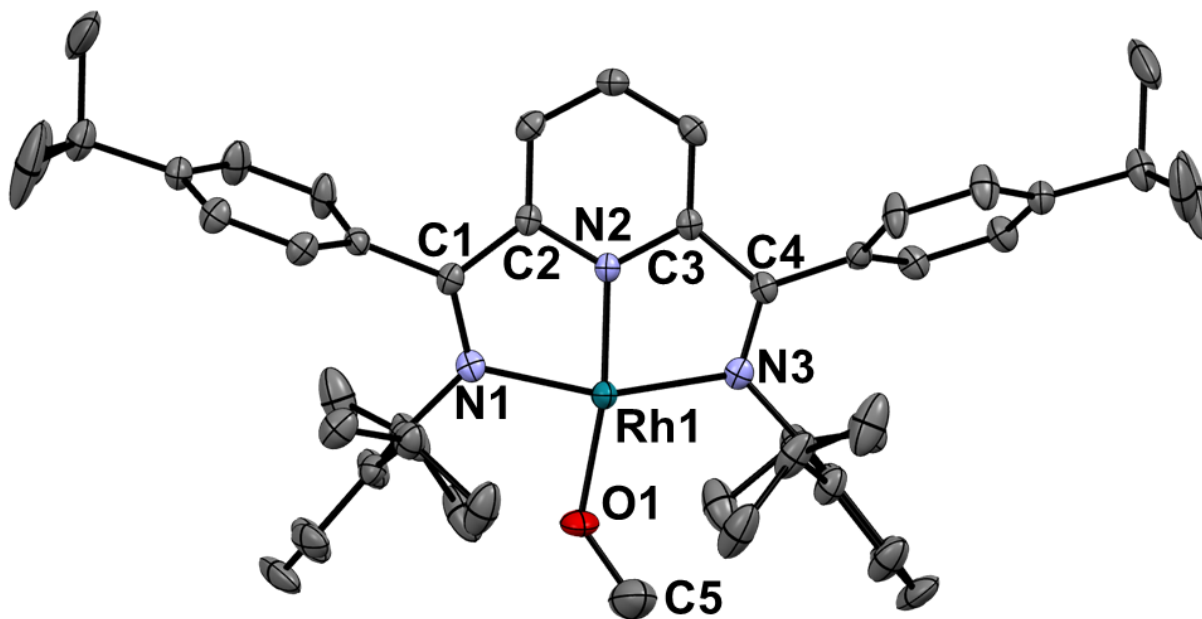

Figure S10: Ortep diagram of the molecular structure of **8**. Hydrogen atoms and solvent molecules are omitted for clarity, ellipsoids are shown at the 50% probability level.

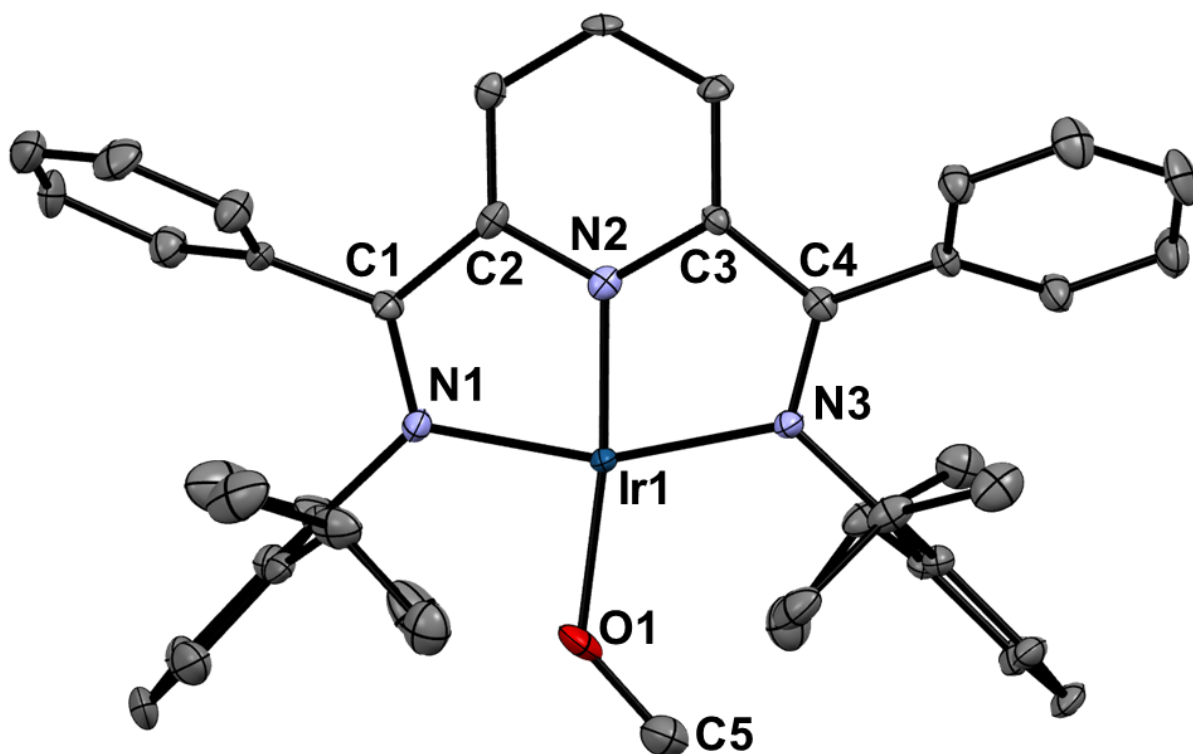

Figure S11: Ortep diagram of the molecular structure of **9**. Hydrogen atoms and solvent molecules are omitted for clarity, ellipsoids are shown at the 50% probability level.

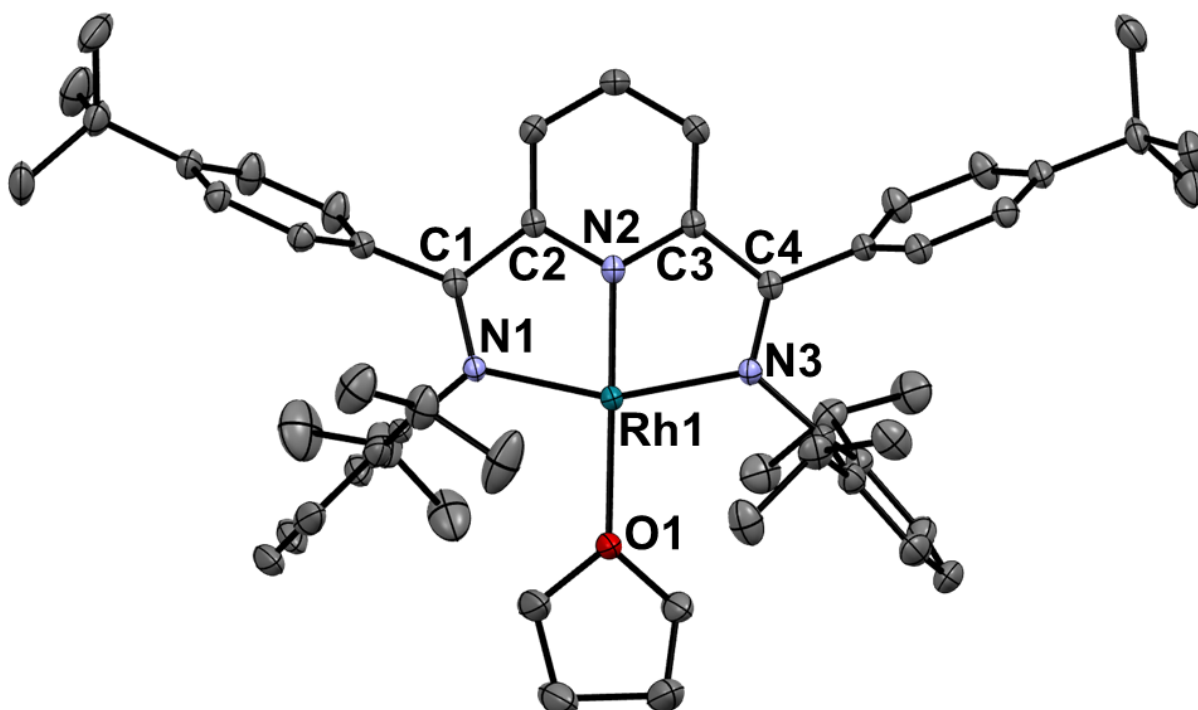

Figure S12: Ortep diagram of the molecular structure of **10**. Hydrogen atoms, solvent molecules and the counter ion are omitted for clarity, ellipsoids are shown at the 50% probability level.

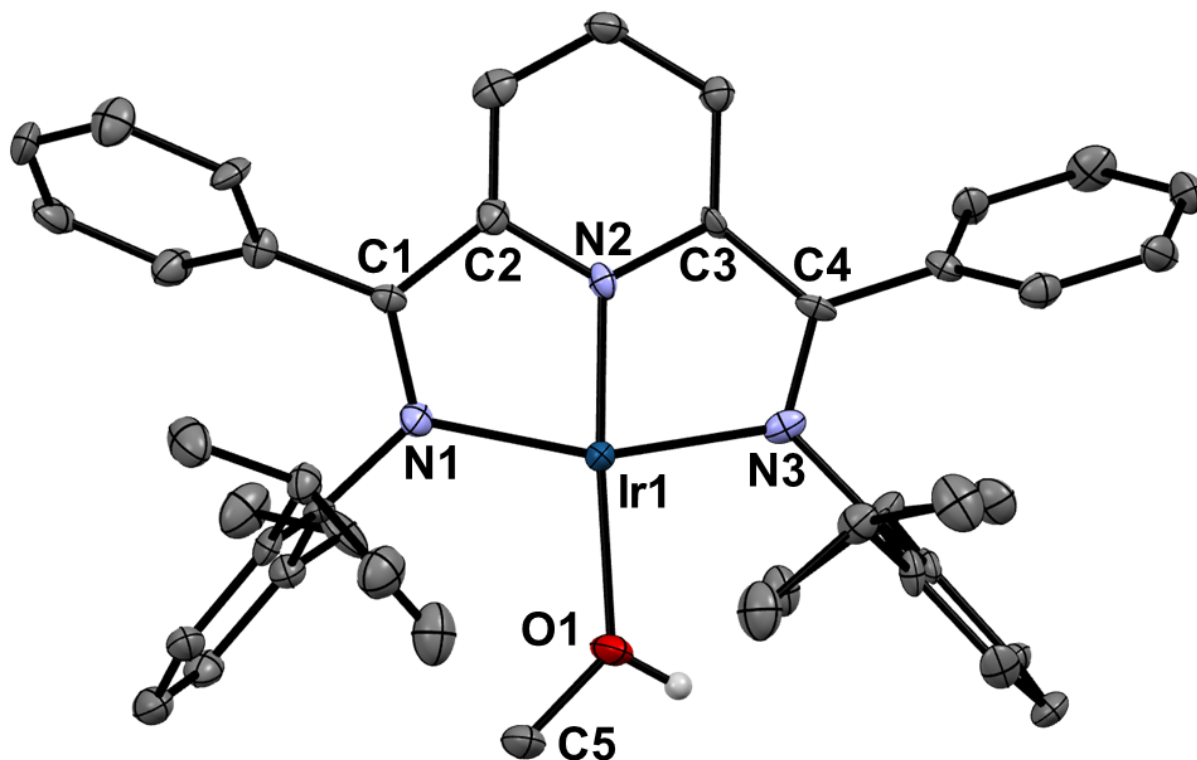

Figure S13: Ortep diagram of the molecular structure of **11**. Hydrogen atoms except of the OH group, solvent molecules and the counter ion are omitted for clarity, ellipsoids are shown at the 50% probability level.

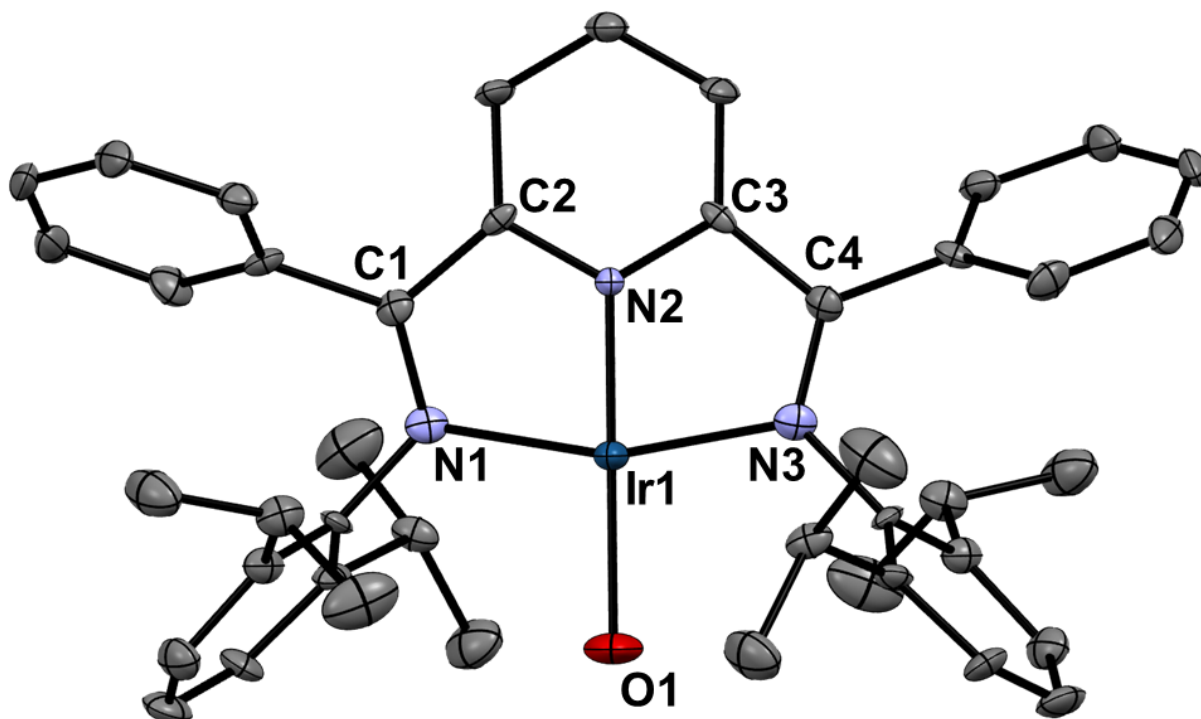

Figure S14: Ortep diagram of the molecular structure of **12**. Hydrogen atoms, solvent molecules and the counter ion are omitted for clarity, ellipsoids are shown at the 50% probability level.

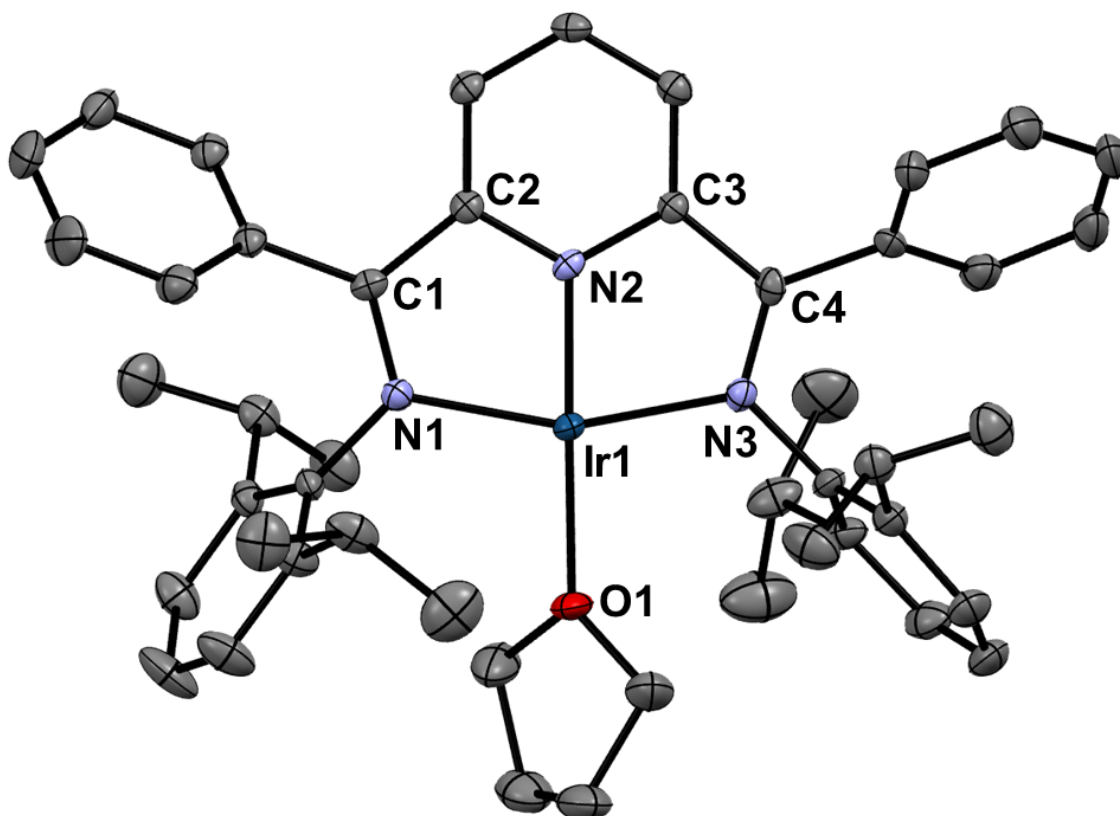

Figure S15: Ortep diagram of the molecular structure of **13**. Hydrogen atoms, solvent molecules and the counter ion are omitted for clarity, ellipsoids are shown at the 50% probability level.

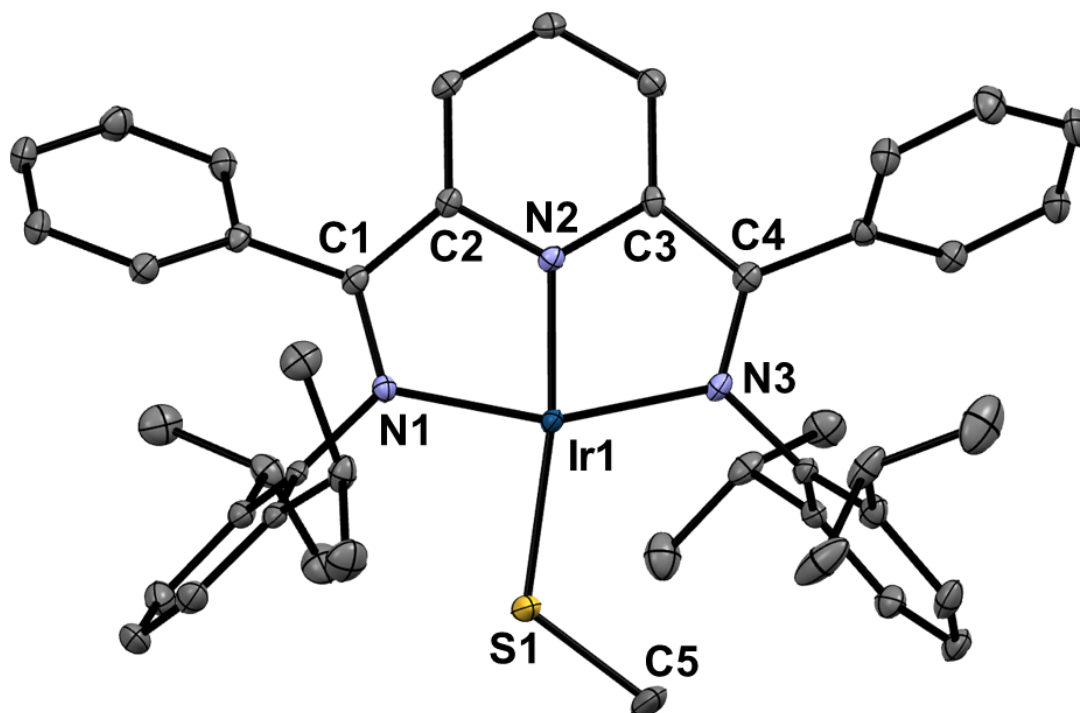

Figure S16: Ortep diagram of the molecular structure of **14**. Hydrogen atoms and solvent molecules are omitted for clarity, ellipsoids are shown at the 50% probability level.

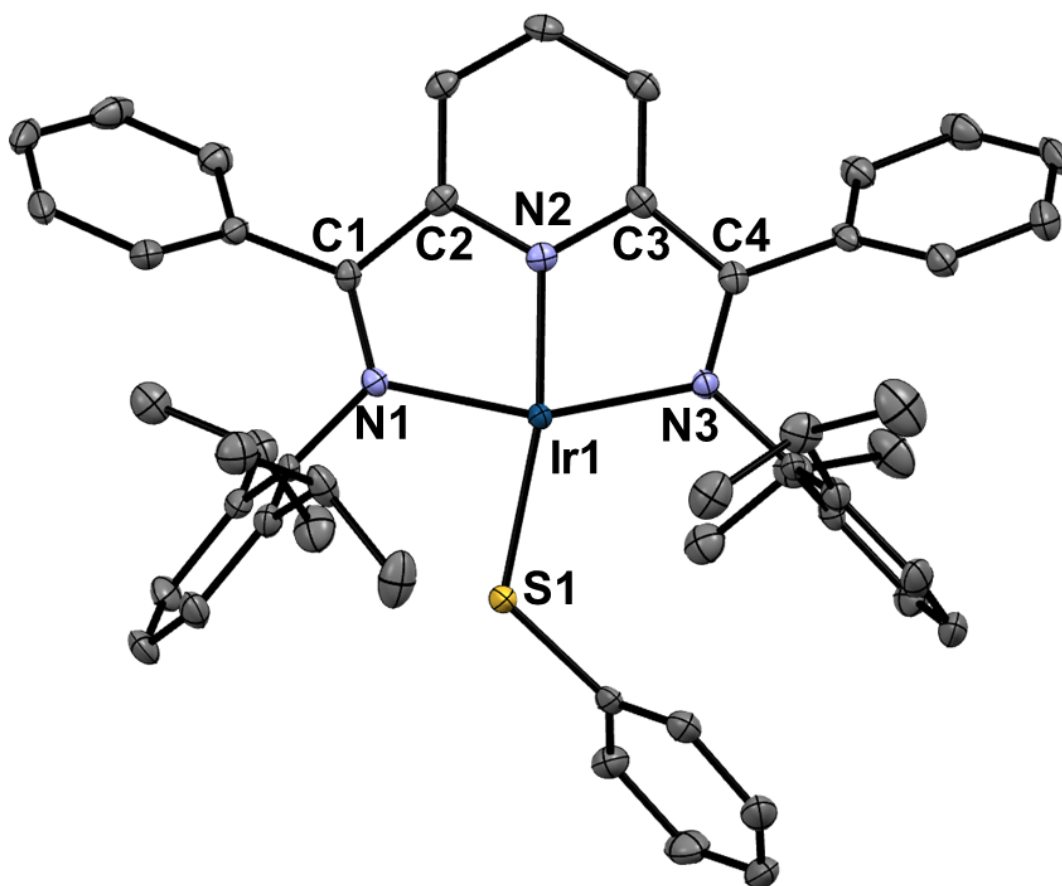

Figure S17: Ortep diagram of the molecular structure of **15**. Hydrogen atoms and solvent molecules are omitted for clarity, ellipsoids are shown at the 50% probability level.

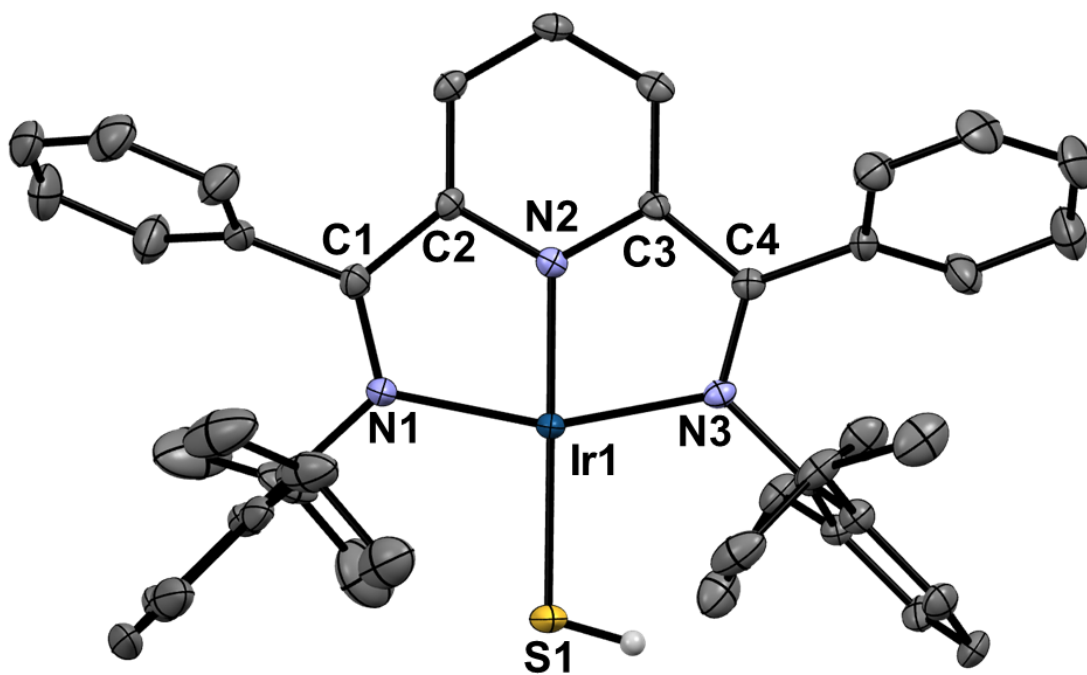

Figure S18: Ortep diagram of the molecular structure of **16**. Hydrogen atoms with exception of the SH group and solvent molecules are omitted for clarity, ellipsoids are shown at the 50% probability level.

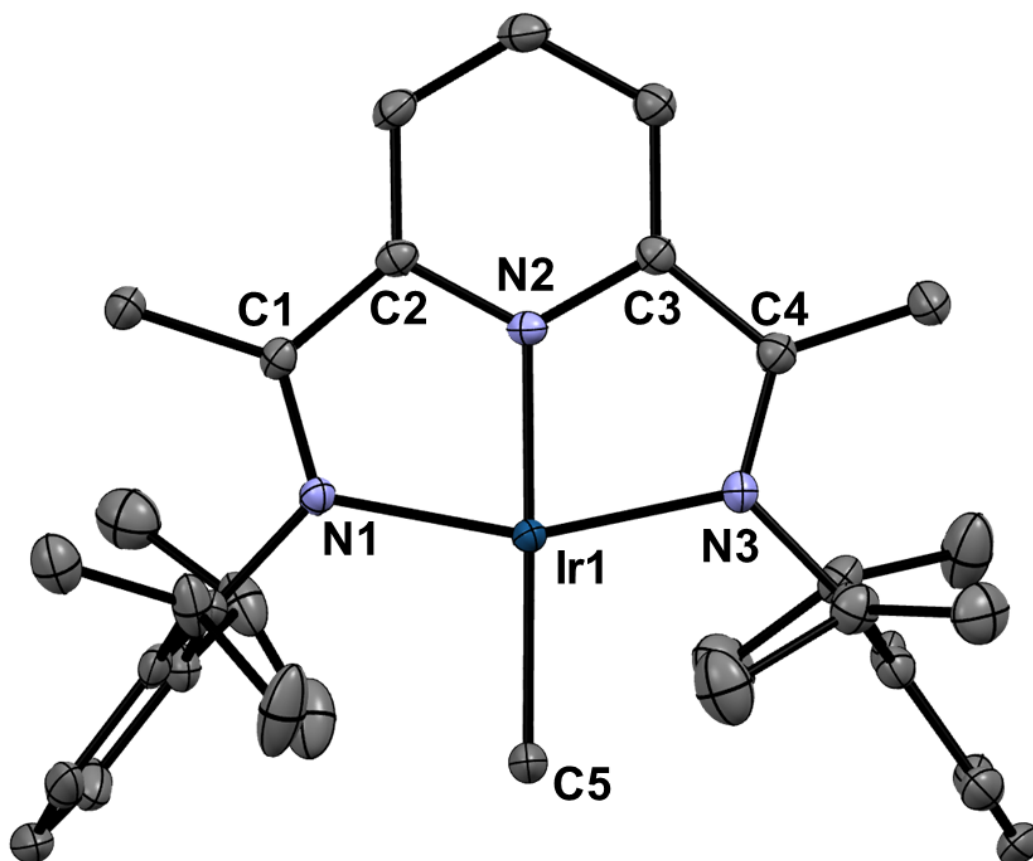

Figure S19: Ortep diagram of the molecular structure of **18**. Hydrogen atoms and solvent molecules are omitted for clarity, ellipsoids are shown at the 50% probability level.

Table S1: Summary of the crystal data and structure refinement.

|                                           | 1                                                             | 2                                                             | 4                                                              |
|-------------------------------------------|---------------------------------------------------------------|---------------------------------------------------------------|----------------------------------------------------------------|
| Empirical formula                         | C <sub>27</sub> H <sub>29</sub> NO <sub>2</sub>               | C <sub>51</sub> H <sub>63</sub> N <sub>3</sub>                | C <sub>51</sub> H <sub>63</sub> ClN <sub>3</sub> Rh            |
| Formula weight                            | 399.51                                                        | 718.09                                                        | 856.40                                                         |
| Temperature/K                             | 100                                                           | 100                                                           | 100                                                            |
| Crystal system                            | monoclinic                                                    | orthorhombic                                                  | monoclinic                                                     |
| Space group                               | P21/n                                                         | F2dd                                                          | P21/c                                                          |
| a/Å                                       | 9.857(3)                                                      | 9.7521(8)                                                     | 17.0626(11)                                                    |
| b/Å                                       | 12.624(4)                                                     | 24.506(2)                                                     | 13.2415(8)                                                     |
| c/Å                                       | 17.963(6)                                                     | 37.086(3)                                                     | 20.7408(13)                                                    |
| α/°                                       | 90                                                            | 90                                                            | 90                                                             |
| β/°                                       | 95.104(3)                                                     | 90                                                            | 100.030(2)                                                     |
| γ/°                                       | 90                                                            | 90                                                            | 90                                                             |
| Volume/Å <sup>3</sup>                     | 2226.5(12)                                                    | 8863.1(13)                                                    | 4614.4(5)                                                      |
| Z                                         | 4                                                             | 1                                                             | 4                                                              |
| ρ <sub>calc</sub> mg/cm <sup>3</sup>      | 1.192                                                         | 1.076                                                         | 1.233                                                          |
| μ/mm <sup>-1</sup>                        | 0.074                                                         | 0.062                                                         | 0.464                                                          |
| F(000)                                    | 856.0                                                         | 3120.0                                                        | 1808.0                                                         |
| Crystal size/mm <sup>3</sup>              | 0.3 × 0.1 × 0.1                                               | 0.01 × 0.01 × 0.01                                            | 0.01 × 0.01 × 0.01                                             |
| Radiation                                 | MoKα (λ = 0.71073)                                            | MoKα (λ = 0.71073)                                            | MoKα (λ = 0.71073)                                             |
| 2θ range for data collection/°            | 3.948 to 46.168                                               | 3.984 to 57.93                                                | 3.916 to 58                                                    |
| Index ranges                              | -10 ≤ h ≤ 10, -13 ≤ k ≤ 13, -19 ≤ l ≤ 19                      | -12 ≤ h ≤ 12, -33 ≤ k ≤ 32, -49 ≤ l ≤ 49                      | -23 ≤ h ≤ 23, -18 ≤ k ≤ 18, -28 ≤ l ≤ 28                       |
| Reflections collected                     | 35866                                                         | 33993                                                         | 113352                                                         |
| Independent reflections                   | 3129 [R <sub>int</sub> = 0.1154, R <sub>sigma</sub> = 0.0541] | 5535 [R <sub>int</sub> = 0.0670, R <sub>sigma</sub> = 0.0560] | 12246 [R <sub>int</sub> = 0.1917, R <sub>sigma</sub> = 0.1049] |
| Data/restraints/parameters                | 3129/0/277                                                    | 5535/1/253                                                    | 12246/9/550                                                    |
| Goodness-of-fit on F <sup>2</sup>         | 1.114                                                         | 1.029                                                         | 1.021                                                          |
| Final R indexes [I ≥ 2σ(I)]               | R <sub>1</sub> = 0.0560, wR <sub>2</sub> = 0.1034             | R <sub>1</sub> = 0.0476, wR <sub>2</sub> = 0.0990             | R <sub>1</sub> = 0.0512, wR <sub>2</sub> = 0.0874              |
| Final R indexes [all data]                | R <sub>1</sub> = 0.0886, wR <sub>2</sub> = 0.1156             | R <sub>1</sub> = 0.0812, wR <sub>2</sub> = 0.1113             | R <sub>1</sub> = 0.1129, wR <sub>2</sub> = 0.1097              |
| Largest diff. peak/hole/e Å <sup>-3</sup> | 0.17/-0.20                                                    | 0.18/-0.18                                                    | 0.48/-0.83                                                     |
| Flack parameter                           |                                                               | -2.4(10)                                                      |                                                                |

Table S2: Summary of the crystal data and structure refinement for the reported complexes.

|                                           | <b>6</b>                                                       | <b>7</b>                                                      | <b>8</b>                                                      |
|-------------------------------------------|----------------------------------------------------------------|---------------------------------------------------------------|---------------------------------------------------------------|
| Empirical formula                         | C <sub>51</sub> H <sub>64</sub> N <sub>3</sub> ORh             | C <sub>43</sub> H <sub>48</sub> IrN <sub>3</sub> O            | C <sub>52</sub> H <sub>66</sub> N <sub>3</sub> ORh            |
| Formula weight                            | 837.96                                                         | 815.04                                                        | 851.98                                                        |
| Temperature/K                             | 100                                                            | 100                                                           | 100                                                           |
| Crystal system                            | monoclinic                                                     | monoclinic                                                    | monoclinic                                                    |
| Space group                               | P2 <sub>1</sub> /c                                             | P2 <sub>1</sub>                                               | C2/c                                                          |
| a/Å                                       | 17.5768(4)                                                     | 13.806(3)                                                     | 13.2952(5)                                                    |
| b/Å                                       | 13.3760(3)                                                     | 11.209(2)                                                     | 18.3006(6)                                                    |
| c/Å                                       | 20.9060(4)                                                     | 14.634(3)                                                     | 18.2820(6)                                                    |
| α/°                                       | 90                                                             | 90                                                            | 90                                                            |
| β/°                                       | 110.2610(10)                                                   | 111.464(2)                                                    | 92.877(3)                                                     |
| γ/°                                       | 90                                                             | 90                                                            | 90                                                            |
| Volume/Å <sup>3</sup>                     | 4611.02(17)                                                    | 2107.6(7)                                                     | 4442.6(3)                                                     |
| Z                                         | 4                                                              | 2                                                             | 4                                                             |
| ρ <sub>calc</sub> mg/cm <sup>3</sup>      | 1.207                                                          | 1.284                                                         | 1.274                                                         |
| μ/mm <sup>-1</sup>                        | 0.408                                                          | 3.199                                                         | 0.425                                                         |
| F(000)                                    | 1776.0                                                         | 824.0                                                         | 1808.0                                                        |
| Crystal size/mm <sup>3</sup>              | 0.01 × 0.01 × 0.01                                             | 0.159 × 0.103 × 0.022                                         | 0.01 × 0.01 × 0.01                                            |
| Radiation                                 | MoKα (λ = 0.71073)                                             | MoKα (λ = 0.71073)                                            | Mo Kα (λ = 0.71073)                                           |
| 2θ range for data collection/°            | 3.686 to 68.488                                                | 2.99 to 52.992                                                | 7.352 to 53.99                                                |
| Index ranges                              | -27 ≤ h ≤ 27, -20 ≤ k ≤ 20, -33 ≤ l ≤ 32                       | -17 ≤ h ≤ 17, -14 ≤ k ≤ 14, -18 ≤ l ≤ 18                      | -16 ≤ h ≤ 16, -23 ≤ k ≤ 23, -23 ≤ l ≤ 23                      |
| Reflections collected                     | 128557                                                         | 27630                                                         | 34438                                                         |
| Independent reflections                   | 18440 [R <sub>int</sub> = 0.0223, R <sub>sigma</sub> = 0.0154] | 8668 [R <sub>int</sub> = 0.0383, R <sub>sigma</sub> = 0.0511] | 4843 [R <sub>int</sub> = 0.1038, R <sub>sigma</sub> = 0.0867] |
| Data/restraints/parameters                | 18440/0/586                                                    | 8668/32/454                                                   | 4843/0/284                                                    |
| Goodness-of-fit on F <sup>2</sup>         | 1.047                                                          | 1.036                                                         | 1.034                                                         |
| Final R indexes [I ≥ 2σ(I)]               | R <sub>1</sub> = 0.0277, wR <sub>2</sub> = 0.0704              | R <sub>1</sub> = 0.0317, wR <sub>2</sub> = 0.0683             | R <sub>1</sub> = 0.0517, wR <sub>2</sub> = 0.1066             |
| Final R indexes [all data]                | R <sub>1</sub> = 0.0330, wR <sub>2</sub> = 0.0744              | R <sub>1</sub> = 0.0369, wR <sub>2</sub> = 0.0699             | R <sub>1</sub> = 0.0765, wR <sub>2</sub> = 0.1179             |
| Largest diff. peak/hole/e Å <sup>-3</sup> | 1.20/-0.56                                                     | 1.95/-1.95                                                    | 0.80/-0.63                                                    |
| Flack parameter                           |                                                                | 0.016(5)                                                      |                                                               |



Table S3: Summary of the crystal data and structure refinement for the reported complexes.

|                                           | <b>9</b>                                                       | <b>10</b>                                                                                     | <b>11</b>                                                                                     |
|-------------------------------------------|----------------------------------------------------------------|-----------------------------------------------------------------------------------------------|-----------------------------------------------------------------------------------------------|
| Empirical formula                         | C <sub>44</sub> H <sub>50</sub> IrN <sub>3</sub> O             | C <sub>57</sub> H <sub>71</sub> F <sub>6</sub> N <sub>4</sub> O <sub>5</sub> RhS <sub>2</sub> | C <sub>46</sub> H <sub>51</sub> F <sub>6</sub> IrN <sub>4</sub> O <sub>5</sub> S <sub>2</sub> |
| Formula weight                            | 829.12                                                         | 1173.23                                                                                       | 1110.22                                                                                       |
| Temperature/K                             | 100                                                            | 100                                                                                           | 100                                                                                           |
| Crystal system                            | triclinic                                                      | orthorhombic                                                                                  | orthorhombic                                                                                  |
| Space group                               | P-1                                                            | Pbca                                                                                          | Pna2 <sub>1</sub>                                                                             |
| a/Å                                       | 14.1834(12)                                                    | 20.427(19)                                                                                    | 23.847(3)                                                                                     |
| b/Å                                       | 16.3279(14)                                                    | 25.08(2)                                                                                      | 10.9865(13)                                                                                   |
| c/Å                                       | 20.8214(17)                                                    | 25.37(3)                                                                                      | 17.654(2)                                                                                     |
| α/°                                       | 111.1830(10)                                                   | 90                                                                                            | 90                                                                                            |
| β/°                                       | 91.6490(10)                                                    | 90                                                                                            | 90                                                                                            |
| γ/°                                       | 114.3510(10)                                                   | 90                                                                                            | 90                                                                                            |
| Volume/Å <sup>3</sup>                     | 4005.4(6)                                                      | 12996(22)                                                                                     | 4625.3(9)                                                                                     |
| Z                                         | 2                                                              | 4                                                                                             | 4                                                                                             |
| ρ <sub>calc</sub> mg/cm <sup>3</sup>      | 1.435                                                          | 1.347                                                                                         | 1.594                                                                                         |
| μ/mm <sup>-1</sup>                        | 3.372                                                          | 0.398                                                                                         | 3.051                                                                                         |
| F(000)                                    | 1760.0                                                         | 5536.0                                                                                        | 2232.0                                                                                        |
| Crystal size/mm <sup>3</sup>              | 0.01 × 0.01 × 0.01                                             | 0.264 × 0.234 × 0.216                                                                         | 0.201 × 0.078 × 0.036                                                                         |
| Radiation                                 | MoKα (λ = 0.71073)                                             | MoKα (λ = 0.71073)                                                                            | MoKα (λ = 0.71073)                                                                            |
| 2θ range for data collection/°            | 2.146 to 57.848                                                | 3.032 to 58.018                                                                               | 3.416 to 54.996                                                                               |
| Index ranges                              | -18 ≤ h ≤ 17, -22 ≤ k ≤ 21, -27 ≤ l ≤ 27                       | -27 ≤ h ≤ 27, -33 ≤ k ≤ 32, -33 ≤ l ≤ 33                                                      | -30 ≤ h ≤ 30, -14 ≤ k ≤ 14, -22 ≤ l ≤ 22                                                      |
| Reflections collected                     | 39576                                                          | 151038                                                                                        | 67592                                                                                         |
| Independent reflections                   | 12845 [R <sub>int</sub> = 0.0236, R <sub>sigma</sub> = 0.0265] | 16614 [R <sub>int</sub> = 0.0240, R <sub>sigma</sub> = 0.0141]                                | 10603 [R <sub>int</sub> = 0.1262, R <sub>sigma</sub> = 0.0917]                                |
| Data/restraints/parameters                | 12845/0/946                                                    | 16614/194/821                                                                                 | 10603/10/589                                                                                  |
| Goodness-of-fit on F <sup>2</sup>         | 1.025                                                          | 1.055                                                                                         | 1.022                                                                                         |
| Final R indexes [I ≥ 2σ(I)]               | R <sub>1</sub> = 0.0192, wR <sub>2</sub> = 0.0395              | R <sub>1</sub> = 0.0398, wR <sub>2</sub> = 0.0981                                             | R <sub>1</sub> = 0.0446, wR <sub>2</sub> = 0.0860                                             |
| Final R indexes [all data]                | R <sub>1</sub> = 0.0262, wR <sub>2</sub> = 0.0416              | R <sub>1</sub> = 0.0501, wR <sub>2</sub> = 0.1083                                             | R <sub>1</sub> = 0.0730, wR <sub>2</sub> = 0.0977                                             |
| Largest diff. peak/hole/e Å <sup>-3</sup> | 0.54/-0.28                                                     | 1.22/-0.65                                                                                    | 2.02/-2.07                                                                                    |
| Flack parameter                           |                                                                |                                                                                               | -0.005(6)                                                                                     |

Table S4: Summary of the crystal data and structure refinement for the reported complexes.

|                                           | <b>12</b>                                                                                     | <b>13</b>                                                                                     | <b>14</b>                                                      |
|-------------------------------------------|-----------------------------------------------------------------------------------------------|-----------------------------------------------------------------------------------------------|----------------------------------------------------------------|
| Empirical formula                         | C <sub>45</sub> H <sub>47</sub> F <sub>6</sub> IrN <sub>4</sub> O <sub>5</sub> S <sub>2</sub> | C <sub>49</sub> H <sub>55</sub> F <sub>6</sub> IrN <sub>4</sub> O <sub>5</sub> S <sub>2</sub> | C <sub>44</sub> H <sub>50</sub> IrN <sub>3</sub> S             |
| Formula weight                            | 1094.18                                                                                       | 1186.34                                                                                       | 845.18                                                         |
| Temperature/K                             | 100                                                                                           | 100                                                                                           | 100                                                            |
| Crystal system                            | orthorhombic                                                                                  | monoclinic                                                                                    | monoclinic                                                     |
| Space group                               | Aea2                                                                                          | P2 <sub>1</sub> /c                                                                            | P2 <sub>1</sub> /n                                             |
| a/Å                                       | 23.495(5)                                                                                     | 14.1152(17)                                                                                   | 11.2777(9)                                                     |
| b/Å                                       | 11.022(2)                                                                                     | 23.586(3)                                                                                     | 29.588(2)                                                      |
| c/Å                                       | 17.639(4)                                                                                     | 15.1227(18)                                                                                   | 26.378(2)                                                      |
| α/°                                       | 90                                                                                            | 90                                                                                            | 90                                                             |
| β/°                                       | 90                                                                                            | 101.4344(15)                                                                                  | 94.8920(10)                                                    |
| γ/°                                       | 90                                                                                            | 90                                                                                            | 90                                                             |
| Volume/Å <sup>3</sup>                     | 4567.7(17)                                                                                    | 4934.7(10)                                                                                    | 8769.9(11)                                                     |
| Z                                         | 4                                                                                             | 4                                                                                             | 4                                                              |
| ρ <sub>calc</sub> mg/cm <sup>3</sup>      | 1.591                                                                                         | 1.597                                                                                         | 1.428                                                          |
| μ/mm <sup>-1</sup>                        | 3.088                                                                                         | 2.866                                                                                         | 3.131                                                          |
| F(000)                                    | 2192.0                                                                                        | 2400.0                                                                                        | 3844.0                                                         |
| Crystal size/mm <sup>3</sup>              | 0.125 × 0.052 × 0.038                                                                         | 0.03 × 0.03 × 0.001                                                                           | 0.137 × 0.075 × 0.049                                          |
| Radiation                                 | MoKα (λ = 0.71073)                                                                            | MoKα (λ = 0.71073)                                                                            | MoKα (λ = 0.71073)                                             |
| 2θ range for data collection/°            | 4.618 to 54.994                                                                               | 2.944 to 57.728                                                                               | 2.072 to 54.996                                                |
| Index ranges                              | -30 ≤ h ≤ 30, -14 ≤ k ≤ 13, -22 ≤ l ≤ 22                                                      | -18 ≤ h ≤ 18, -30 ≤ k ≤ 30, -20 ≤ l ≤ 20                                                      | -14 ≤ h ≤ 14, -38 ≤ k ≤ 38, -34 ≤ l ≤ 34                       |
| Reflections collected                     | 28962                                                                                         | 73632                                                                                         | 133021                                                         |
| Independent reflections                   | 5196 [R <sub>int</sub> = 0.0721, R <sub>sigma</sub> = 0.0568]                                 | 12199 [R <sub>int</sub> = 0.0590, R <sub>sigma</sub> = 0.0437]                                | 20090 [R <sub>int</sub> = 0.0405, R <sub>sigma</sub> = 0.0265] |
| Data/restraints/parameters                | 5196/1/289                                                                                    | 12199/9/767                                                                                   | 20090/0/1151                                                   |
| Goodness-of-fit on F <sup>2</sup>         | 1.115                                                                                         | 1.041                                                                                         | 1.037                                                          |
| Final R indexes [I ≥ 2σ(I)]               | R <sub>1</sub> = 0.0436, wR <sub>2</sub> = 0.0715                                             | R <sub>1</sub> = 0.0335, wR <sub>2</sub> = 0.0710                                             | R <sub>1</sub> = 0.0211, wR <sub>2</sub> = 0.0459              |
| Final R indexes [all data]                | R <sub>1</sub> = 0.0702, wR <sub>2</sub> = 0.0773                                             | R <sub>1</sub> = 0.0493, wR <sub>2</sub> = 0.0769                                             | R <sub>1</sub> = 0.0280, wR <sub>2</sub> = 0.0491              |
| Largest diff. peak/hole/e Å <sup>-3</sup> | 1.52/-2.37                                                                                    | 1.40/-1.09                                                                                    | 1.19/-0.51                                                     |
| Flack parameter                           | 0.482(13)                                                                                     | -0.005(6)                                                                                     | -0.005(6)                                                      |

Table S5: Summary of the crystal data and structure refinement for the reported complexes.

|                                           | <b>15</b>                                                     | <b>16</b>                                                      | <b>18</b>                                                      |
|-------------------------------------------|---------------------------------------------------------------|----------------------------------------------------------------|----------------------------------------------------------------|
| Empirical formula                         | C <sub>49</sub> H <sub>52</sub> IrN <sub>3</sub> S            | C <sub>43</sub> H <sub>48</sub> IrN <sub>3</sub> S             | C <sub>34</sub> H <sub>46</sub> IrN <sub>3</sub>               |
| Formula weight                            | 907.25                                                        | 831.16                                                         | 688.94                                                         |
| Temperature/K                             | 100                                                           | 100                                                            | 100                                                            |
| Crystal system                            | monoclinic                                                    | triclinic                                                      | orthorhombic                                                   |
| Space group                               | P2 <sub>1</sub> /c                                            | P-1                                                            | P2 <sub>1</sub> 2 <sub>1</sub> 2 <sub>1</sub>                  |
| a/Å                                       | 15.0917(15)                                                   | 14.1777(11)                                                    | 8.40294(7)                                                     |
| b/Å                                       | 10.7852(11)                                                   | 16.3944(13)                                                    | 18.04559(14)                                                   |
| c/Å                                       | 25.300(3)                                                     | 20.7684(16)                                                    | 20.27655(16)                                                   |
| α/°                                       | 90                                                            | 110.9310(10)                                                   | 90                                                             |
| β/°                                       | 100.5470(10)                                                  | 91.7428(10)                                                    | 90                                                             |
| γ/°                                       | 90                                                            | 114.2710(9)                                                    | 90                                                             |
| Volume/Å <sup>3</sup>                     | 4048.4(8)                                                     | 4020.2(5)                                                      | 3074.66(4)                                                     |
| Z                                         | 4                                                             | 2                                                              | 4                                                              |
| ρ <sub>calc</sub> mg/cm <sup>3</sup>      | 1.488                                                         | 1.433                                                          | 1.488                                                          |
| μ/mm <sup>-1</sup>                        | 3.388                                                         | 3.409                                                          | 4.368                                                          |
| F(000)                                    | 1840.0                                                        | 1760.0                                                         | 1392.0                                                         |
| Crystal size/mm <sup>3</sup>              | 0.147 × 0.133 × 0.107                                         | 0.087 × 0.057 × 0.045                                          | 0.3 × 0.07 × 0.07                                              |
| Radiation                                 | MoKα (λ = 0.71073)                                            | MoKα (λ = 0.71073)                                             | MoKα (λ = 0.71073)                                             |
| 2θ range for data collection/°            | 2.744 to 54.998                                               | 2.146 to 54                                                    | 5.712 to 65.238                                                |
| Index ranges                              | -19 ≤ h ≤ 19, -14 ≤ k ≤ 14, -32 ≤ l ≤ 32                      | -18 ≤ h ≤ 18, -20 ≤ k ≤ 20, -26 ≤ l ≤ 26                       | -12 ≤ h ≤ 12, -27 ≤ k ≤ 27, -30 ≤ l ≤ 30                       |
| Reflections collected                     | 59248                                                         | 59972                                                          | 60851                                                          |
| Independent reflections                   | 9292 [R <sub>int</sub> = 0.0432, R <sub>sigma</sub> = 0.0299] | 17453 [R <sub>int</sub> = 0.0387, R <sub>sigma</sub> = 0.0402] | 10693 [R <sub>int</sub> = 0.0421, R <sub>sigma</sub> = 0.0316] |
| Data/restraints/parameters                | 9292/0/546                                                    | 17453/18/1031                                                  | 10693/0/354                                                    |
| Goodness-of-fit on F <sup>2</sup>         | 1.147                                                         | 1.027                                                          | 1.034                                                          |
| Final R indexes [I ≥ 2σ(I)]               | R <sub>1</sub> = 0.0285, wR <sub>2</sub> = 0.0523             | R <sub>1</sub> = 0.0274, wR <sub>2</sub> = 0.0541              | R <sub>1</sub> = 0.0221, wR <sub>2</sub> = 0.0435              |
| Final R indexes [all data]                | R <sub>1</sub> = 0.0382, wR <sub>2</sub> = 0.0548             | R <sub>1</sub> = 0.0400, wR <sub>2</sub> = 0.0585              | R <sub>1</sub> = 0.0259, wR <sub>2</sub> = 0.0447              |
| Largest diff. peak/hole/e Å <sup>-3</sup> | 1.59/-1.55                                                    | 0.95/-0.82                                                     | 1.21/-0.43                                                     |
| Flack parameter                           |                                                               |                                                                | 0.153(3)                                                       |

## CSD Statistical Analysis of Rh,Ir-O,S Bond Distances

CSD Statistical Analysis of Rh,Ir-O,S Bond Distances in CCSD Database (CSD 5.44 April 2023)

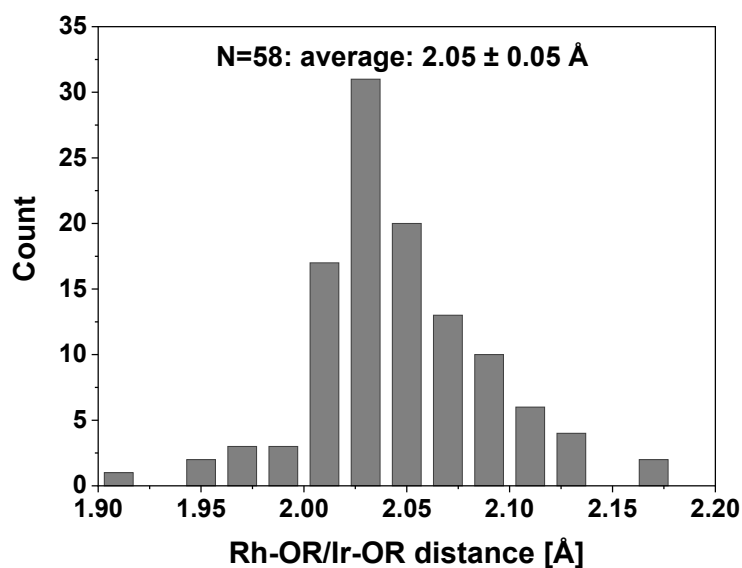

BRNPIR;CAJGUQ;DAKFUR;DOBZEZ;DOBZEZ;BRNPIR;CEZJUP;CEZJUP;FADWUF;IBIWEZ;FADXIU;CTROP01;FADXAM;HAYQEF;  
DORWEM;HESDAL;IBIWID;DAVCAE;HAZCIV;CTROP01;FADXEQ;ERAYAA;HILGAM;FOHDUC;HIMFOY;DENQAO;DENQAO;DIBJ  
UT;GOLPEC;FAFGIC;GETWUY;GAGHOL;DUZJUD;DENQAO;FOHDUC;DACCUG;DENQAO;EXOXIY;HOWRAM;DACCOA;EXOXIY;D  
AKHED;IYIXUK;ETIQAA;ETIPAZ;GETWUY;DACDER;IBIHUZ;FUJHEX;IBIJAH;IBEWOE;IBEXAR;EXIXIS;FUJHIB;UDIVAI;DUKMAZ;JIM  
GER

Figure S20, Rh,Ir-O Bond Distances and employed structures by CCSD code.

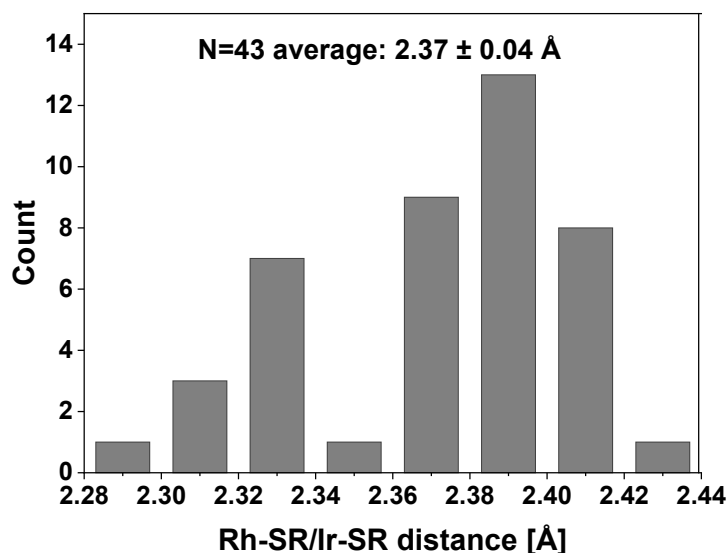

DOQKUP;JANWOK;JANWOK;SOJBUO;CETMRH;CEHTIW;NUXSAC;UGANEW;GIPYIN;DUKMAZ;YIVQOJ;DOQKUP;ICASEK;JASPEZ  
;CEHTIW;DAQKAH;WOHKIN;PUFLIL;GOHSEB;ICIVUN;GOHSEB;ICIVOH;ICIVOH;WEQFUT;ICIVUN;XIKDUR;PUFLIL01;GOHSIF;QE  
FFIQ;WAXTOE;WOHKOT;ICIWU;ICIWU;GOHSIF;EGIBIG;WOHKOT;NETVUE;ICIWEY;DEQLOB;WAXTUK;WETJEL;WETJIP;PER  
CIY

Figure S21: Rh,Ir-S bond distances and employed structures by CCSD code.

## Computational Details

The calculations were carried out on our local 32 core and 96 core machines equipped with 512 GB respectively 3 TB RAM and the two 40 core nodes (1 TB RAM) of the “Hummel” computing cluster of the University of Hamburg computing center (RRZ) employing fast SSD/NVME scratch disk space.

DFT calculations were carried out with version 7.7.1 of the parallelized Turbomole program package.[12] def2-TZVP basis sets were employed for all atoms, for the rhodium and iridium atoms the def2-ECP pseudopotentials were used (Ir: ECP-60-MWB, Rh: ECP-28-MWB). The RI-DFT method was used with the corresponding RIJ-auxiliary basis for the PBE functional. For the PW6B95 hybrid functional seminumeric exchange (\$senex keyword) was employed. Dispersion was included in the DFT calculations with Grimme’s D3 method in combination with Becke-Johnson damping (D3BJ). Solvation effects were included within the COSMO formalism using a dielectric constant of  $\epsilon = 7.6$  for THF. The geometries were fully optimized without geometry or symmetry constraints; minima were confirmed by the absence of imaginary frequencies in the calculations of the analytic second derivatives, for transition states only one imaginary frequency was observed. Transition state optimizations were carried with Kästners DL-FIND optimizer[13] implemented in TCL-Chemshell 3.7[14] starting from transition state geometries obtained from linear transit searches. IRC calculations were carried out to confirm that the transition states connect the starting material and product. The coordinates of the optimized geometries are tabulated below.

Local natural orbital LNO-CCSD(T) calculations were carried out with the freely available MRCC (2022) program package (<https://www.mrcc.hu/>) using the default thresholds (lcorthr=normal).[15] Geometries optimized at the PBE-D3BJ/def2-TZVP with or without/Cosmo solvation (see text:  $\epsilon=7.6$ ) level were employed with def2-TZVPP basis sets in combination with complementary def2-QZVPP/C auxiliary correlation basis sets and the aforementioned pseudopotentials. The solvation correction was obtained from the energy differences of two single point calculations at the PBE-D3BJ(COSMO( $\epsilon=7.6$ )/def2-TZVP) and PBE-D3BJ/def2-TZVP (gas phase) level. Back corrections for the LNO-CCSD(T) energies to free enthalpies ( $\Delta G_{298}$ ) were carried out with thermochemical data obtained from the DFT calculations at the PBE-D3BJ/def2-TZVP level. A value of 1.011 was taken as scaling factor from Truhlers database (ver. 5.0). The values for the T1 and D1 diagnostics were typically  $T1 \approx 0.015$  and  $D1 \approx 0.15$  signaling single reference cases.

The QTAIM calculations were performed with the MultiWfn (ver. 3.8) program package (<http://sobereva.com/multiwfn/>).[16,17] The required wfx file was obtained from a Turbomole generated Molden file and subsequent conversion by Molden2aim (<https://github.com/zorkzou/Molden2AIM>). Both, basis sets with ECPs (def2-TZVP) and the x2c-TZVPall all-electron basis sets in combination with the X2C relativistic all-electron approach were tested and gave essentially identical results.

For the oxidation states analyses Head-Gordon’s WB97X-D functional was employed using either Qchem 6.0[18] or Gaussssian 16 rev. C01[19] with tight DFT grids (def2-TZVP basis and def2-ECP pseudopotentials for rhodium and iridium). Oxidation states based on the LOBA and OSLO method were calculated with a prelease version of Q-Chem 6.1 with either Loewdin or Mulliken charges.[18] The APOST-3D program of Pedro Salvador Sedano[20] was used to perform the calculations of the oxidation states by the EOS method using a Gaussian 16 formatted checkpoint file. QTAIM and TFVC charges were employed.

ALMO-EDA calculations were performed with Qchem 6.0 for converged WB97X-D Kohn-Sham wavefunctions (def2-TZVP basis and def2-ECP pseudopotentials for rhodium and iridium).[18]

The NBO 7.0 calculations[21] were performed with a FILE47 input file generated by a Orca 5.04[22] DFT PBE-D3BJ/def2-TZVP single point calculation using geometries optimized by Turbomole.

The AOMIX program package ver. 6.92 was utilized to decompose the Wiberg/Mayer bond orders into their symmetry components.[23,24] The required Molden input file was prepared by Turbomole with the tm2aomix program for a PBE-D3BJ/def2-TZVP(def2-ECP) calculation of an optimized geometry at that level.

PNO-UCCSD(T1) calculations were carried out with Molpro version 2022.3 with the domopt=tight setting.[25] The SO-SCI SCF optimization scheme was employed to converge to the ground state of the Hartree-Fock reference wave function. Enthalpy corrections to the thermochemical data were provided by the “freeh” program of the Turbomole package from the analytical second derivatives obtained at the UPBE-D3BJ/def2-TZVP level. A value of 1.011 was taken as scaling factor from Truhlers database (ver. 5.0). For the hydrogen atom a value of 5/2 RT was employed. The default def2-TZVP pseudopotentials were employed for rhodium (ECP-28MWB) and iridium (ECP-60MWB). For all atoms the corresponding RIJK auxiliary density fitting basis was used. The values for the T1 and D1 diagnostics were typically  $T1 \approx 0.015$  and  $D1 \approx 0.15$  signaling single reference cases, which was further corroborated by negligible spin contamination ( $\langle S^2 \rangle \approx 0.75$ ) of the Hartree-Fock reference wave functions of the  $S=1/2$  radicals.

Local vibrational force constants were derived employing the local mode vibrational theory developed by Cremer and Kraka et al..[27,28] The calculations were performed with the LMODEA(F90) program kindly provided by Elfi Kraka.[29] The required Hessians (and dipole gradients) were obtained from Turbomole (aoforce) calculations of the analytical second derivatives.

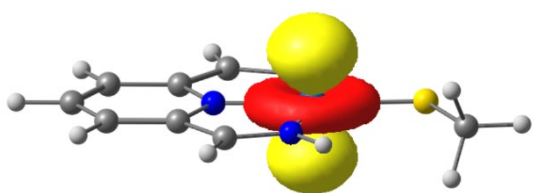

**LP: Ir s(9.54%) d ( 90.46%)**

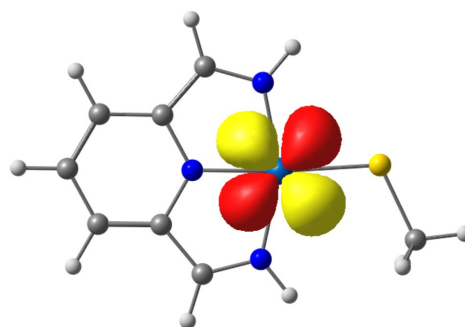

**LP: Ir d(99.7%)**

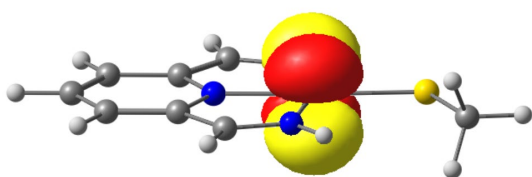

**LP: Ir d (100.00%)**

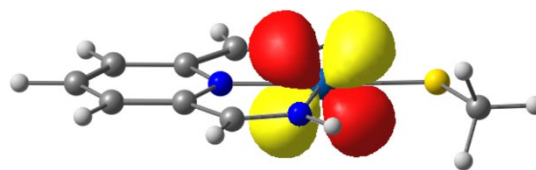

**LP: Ir d(99.99%)**

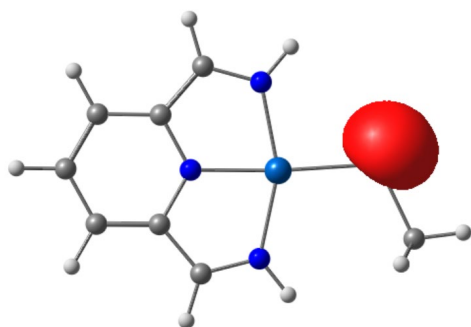

**LP: S s(66.22%) p(33.75%)**

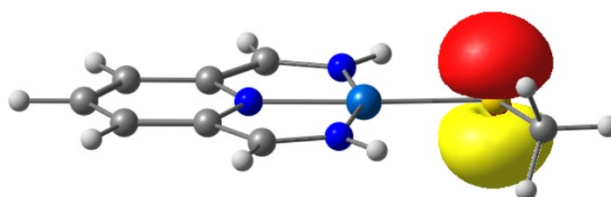

**LP: S p(99.86%)**

*Figure S22: NBOs of (PDI)Ir-SMe model complex: LPs of the Ir and S atoms.*

**Cpd. (PDI)Ir-CH<sub>2</sub>OH**: Xmol xyz coordinates (Å) and total energy in Hartree of DFT PBE-D3BJ/def2-TZVP optimized geometry (gas phase); Ir: def2-ECP (60e); selected hydrogen atoms with H-H interatomic distances in Å are shown.

99

Energy = -2049.087769268

|    |            |            |            |
|----|------------|------------|------------|
| H  | 0.1783483  | 4.2047743  | -2.1733143 |
| C  | 0.0878847  | 3.6748665  | -1.2259648 |
| C  | -0.0525788 | 2.2992848  | 1.2292662  |
| C  | -0.0079310 | 2.2850709  | -1.2318594 |
| C  | 0.0795693  | 4.3758601  | -0.0120213 |
| C  | 0.0065474  | 3.6948881  | 1.2066185  |
| N  | -0.1122578 | 1.6209530  | -0.0005988 |
| H  | 0.1461641  | 5.4636595  | -0.0181762 |
| H  | -0.0091265 | 4.2431330  | 2.1474028  |
| C  | 0.0404388  | 1.3785735  | -2.3343893 |
| C  | -0.1313370 | 1.4112838  | 2.3398170  |
| N  | -0.2173083 | 0.0975394  | 1.9811487  |
| N  | 0.1209163  | 0.0696478  | -1.9572898 |
| Ir | -0.0486506 | -0.2705547 | 0.0170471  |
| C  | 0.9708352  | -2.0634645 | 0.1106182  |
| O  | -0.4004613 | -2.5033763 | 0.1065461  |
| H  | -0.6882074 | -2.6284159 | 1.0413811  |
| C  | 0.3734637  | -0.9526116 | -2.9213998 |
| C  | 0.9030443  | -2.9424258 | -4.7958772 |
| C  | 1.7160057  | -1.3609626 | -3.1305458 |
| C  | -0.7004313 | -1.5561151 | -3.6037289 |
| C  | -0.4083482 | -2.5508468 | -4.5448279 |
| C  | 1.9505649  | -2.3585735 | -4.0833209 |
| H  | -1.2269583 | -3.0226747 | -5.0920499 |
| H  | 2.9734746  | -2.6877853 | -4.2711343 |
| H  | 1.1120867  | -3.7150506 | -5.5378019 |
| C  | -0.2683103 | -0.9999838 | 2.8862950  |
| C  | -0.3109511 | -3.4562739 | 4.2255121  |
| C  | 0.9105270  | -1.4677516 | 3.5158814  |
| C  | -1.4912548 | -1.7167634 | 2.9939912  |
| C  | -1.4777096 | -2.9554618 | 3.6500170  |
| C  | 0.8582516  | -2.7008446 | 4.1779581  |
| H  | -2.4056235 | -3.5252338 | 3.7299049  |
| H  | 1.7612031  | -3.0799201 | 4.6609555  |
| H  | -0.3193203 | -4.4243101 | 4.7285661  |
| C  | 2.8700958  | -0.7345466 | -2.3559255 |
| C  | 2.1987851  | -0.6602666 | 3.5297282  |
| C  | -2.8078433 | -1.1305167 | 2.4944159  |
| C  | -2.1399882 | -1.1584779 | -3.3339820 |
| H  | 1.4535178  | -2.4273372 | -0.8022090 |
| H  | -2.6042415 | -0.0909385 | 2.1958023  |
| H  | 2.0371057  | 0.2388146  | 2.9193110  |
| H  | 2.4543153  | -0.3929464 | -1.3942385 |
| H  | -2.1248554 | -0.3509540 | -2.5876402 |
| H  | 1.4914570  | -2.3424611 | 1.0333581  |
| C  | -0.1670035 | 1.8327676  | -3.7247552 |
| C  | -0.7731723 | 2.7276575  | -6.3445019 |
| C  | -1.1861531 | 2.7816347  | -3.9616421 |
| C  | 0.5308123  | 1.3373870  | -4.8442278 |
| C  | 0.2291403  | 1.7795169  | -6.1313782 |
| C  | -1.4805262 | 3.2262768  | -5.2485403 |
| H  | -1.7773405 | 3.1419807  | -3.1197009 |
| H  | 1.3140594  | 0.5959677  | -4.7160617 |
| H  | 0.7881398  | 1.3747076  | -6.9767398 |
| H  | -2.2822112 | 3.9521207  | -5.3958378 |
| H  | -1.0070743 | 3.0673773  | -7.3545244 |
| C  | -0.1078291 | 1.8654824  | 3.7375704  |
| C  | -0.0014867 | 2.7208309  | 6.4275539  |
| C  | -1.0139839 | 1.3684610  | 4.6923732  |
| C  | 0.8560470  | 2.8006576  | 4.1650810  |
| C  | 0.9028069  | 3.2275284  | 5.4908306  |
| C  | -0.9577170 | 1.7870385  | 6.0202861  |
| H  | -1.7770198 | 0.6564496  | 4.3846280  |
| H  | 1.5975716  | 3.1626486  | 3.4520723  |
| H  | 1.6648341  | 3.9455844  | 5.7987852  |
| H  | -1.6724212 | 1.3859102  | 6.7410420  |
| H  | 0.0416031  | 3.0473158  | 7.4675399  |
| C  | 2.5178810  | -0.2120534 | 4.9663972  |
| H  | 3.3899150  | 0.4583656  | 4.9729782  |
| H  | 2.7540287  | -1.0787887 | 5.6024508  |
| H  | 1.6723370  | 0.3217405  | 5.4186622  |
| C  | 3.3943668  | -1.4134331 | 2.9292196  |

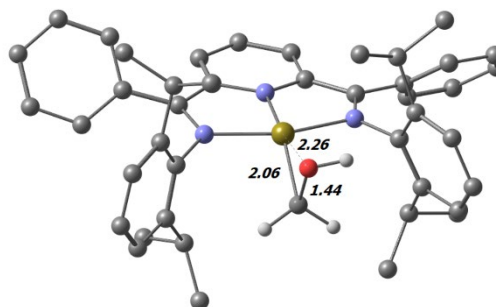



|   |            |            |            |
|---|------------|------------|------------|
| H | 4.3020920  | -0.7970661 | 3.0066229  |
| H | 3.2395806  | -1.6451965 | 1.8671483  |
| H | 3.5880518  | -2.3566117 | 3.4616532  |
| C | -3.3666172 | -1.8526316 | 1.2597798  |
| H | -2.7164535 | -1.7059473 | 0.3870052  |
| H | -4.3596627 | -1.4543609 | 1.0043328  |
| H | -3.4772012 | -2.9326240 | 1.4445532  |
| C | -3.8602214 | -1.1116178 | 3.6158384  |
| H | -3.4804212 | -0.6371371 | 4.5318956  |
| H | -4.1841879 | -2.1289794 | 3.8806031  |
| H | -4.7502673 | -0.5560674 | 3.2868095  |
| C | -2.8318873 | -0.6256068 | -4.5966189 |
| H | -2.9062186 | -1.4057246 | -5.3695446 |
| H | -2.2844729 | 0.2250535  | -5.0243593 |
| H | -3.8537258 | -0.2933974 | -4.3598051 |
| C | -2.9192190 | -2.3336220 | -2.7238738 |
| H | -2.4185420 | -2.7100004 | -1.8214167 |
| H | -3.0029613 | -3.1670389 | -3.4381085 |
| H | -3.9382098 | -2.0199926 | -2.4516616 |
| C | 3.9936430  | -1.7333763 | -2.0510263 |
| H | 4.7069446  | -1.2860509 | -1.3436407 |
| H | 4.5605197  | -2.0042373 | -2.9547388 |
| H | 3.6084858  | -2.6619875 | -1.6056742 |
| C | 3.4526735  | 0.5048053  | -3.0562248 |
| H | 4.3052499  | 0.8946910  | -2.4801775 |
| H | 2.7141014  | 1.3115987  | -3.1429615 |
| H | 3.8133665  | 0.2550068  | -4.0663943 |

**Cpd. TS-rota (PDI)Ir(H) ( $\eta^2$ -CH<sub>2</sub>O):** Xmol xyz coordinates (Å) and total energy in Hartree of DFT PBE-D3BJ/def2-TZVP optimized geometry (gas phase); Ir: def2-ECP (60e); selected hydrogen atoms with H-H interatomic distances in Å are shown.

99

Energy = -2049.073217203  $\nu(\text{imag})=-103.5 \text{ cm}^{-1}$ 

|    |            |            |            |
|----|------------|------------|------------|
| H  | 4.1639050  | -2.1699538 | -0.1748448 |
| C  | 3.6387071  | -1.2192476 | -0.0988382 |
| C  | 2.2477250  | 1.2125088  | -0.0322362 |
| C  | 2.2456436  | -1.2234470 | -0.0135454 |
| C  | 4.3376043  | -0.0085767 | -0.1125633 |
| C  | 3.6412650  | 1.2035855  | -0.0862703 |
| N  | 1.5741566  | -0.0090013 | 0.0709715  |
| H  | 5.4258040  | -0.0093556 | -0.1690221 |
| H  | 4.1707969  | 2.1548723  | -0.1099907 |
| C  | 1.3657198  | -2.3352097 | -0.0717422 |
| C  | 1.3798312  | 2.3348207  | 0.0200476  |
| N  | 0.0643276  | 2.0043266  | 0.1441268  |
| N  | 0.0477041  | -1.9843712 | -0.1423741 |
| Ir | -0.3734915 | 0.0340583  | -0.0815229 |
| C  | -0.9509308 | -3.0026427 | -0.2835433 |
| C  | -3.0202352 | -4.8577865 | -0.5398452 |
| C  | -1.4151620 | -3.6822681 | 0.8640750  |
| C  | -1.4879353 | -3.2679408 | -1.5671311 |
| C  | -2.5288457 | -4.1984718 | -1.6643111 |
| C  | -2.4582781 | -4.6037184 | 0.7076907  |
| H  | -2.9590982 | -4.4147260 | -2.6442397 |
| H  | -2.8334665 | -5.1341233 | 1.5851054  |
| H  | -3.8349668 | -5.5769727 | -0.6383989 |
| C  | -0.9176252 | 3.0207516  | 0.3691924  |
| C  | -2.8141990 | 5.0002191  | 0.8451862  |
| C  | -1.3604377 | 3.2437795  | 1.6919348  |
| C  | -1.4303060 | 3.7527494  | -0.7187270 |
| C  | -2.3795412 | 4.7464156  | -0.4527445 |
| C  | -2.3112284 | 4.2473951  | 1.9040834  |
| H  | -2.7866751 | 5.3294623  | -1.2807722 |
| H  | -2.6651708 | 4.4408922  | 2.9186346  |
| H  | -3.5534736 | 5.7810447  | 1.0320028  |
| C  | -0.8077869 | -3.4683489 | 2.2419179  |
| H  | 0.0226400  | -2.7559300 | 2.1351673  |
| C  | -1.8111003 | -2.8631505 | 3.2357317  |
| H  | -1.3417407 | -2.7444530 | 4.2235460  |
| H  | -2.6909480 | -3.5122404 | 3.3580449  |
| H  | -2.1619132 | -1.8729242 | 2.9134460  |
| C  | -0.2362116 | -4.7835241 | 2.7961536  |
| H  | 0.3015115  | -4.5979277 | 3.7376353  |
| H  | 0.4614586  | -5.2492775 | 2.0885147  |
| H  | -1.0395835 | -5.5051903 | 3.0083055  |
| C  | -0.8544588 | 2.4185319  | 2.8651476  |
| H  | -0.0375895 | 1.7812942  | 2.4944892  |
| C  | -1.9614075 | 1.4886813  | 3.3880304  |
| H  | -1.5675720 | 0.8198379  | 4.1681877  |
| H  | -2.3726432 | 0.8837715  | 2.5699615  |
| H  | -2.7866801 | 2.0715232  | 3.8249331  |
| C  | -0.2955411 | 3.2830179  | 4.0039173  |
| H  | 0.0937937  | 2.6421194  | 4.8088521  |
| H  | -1.0731544 | 3.9270376  | 4.4408400  |
| H  | 0.5258195  | 3.9302957  | 3.6649587  |
| C  | -1.0163540 | 3.4566339  | -2.1482651 |
| H  | -0.1669845 | 2.7597661  | -2.1117833 |
| C  | -2.1607164 | 2.7454121  | -2.8889700 |
| H  | -1.8424624 | 2.4471293  | -3.8993281 |
| H  | -3.0337873 | 3.4083225  | -2.9886313 |
| H  | -2.4783625 | 1.8487641  | -2.3387707 |
| C  | -0.5564188 | 4.7135488  | -2.8973288 |
| H  | 0.2607183  | 5.2181747  | -2.3636260 |
| H  | -1.3794019 | 5.4331223  | -3.0217885 |
| H  | -0.1975706 | 4.4466917  | -3.9026691 |
| C  | -0.9593675 | -2.6037073 | -2.8333013 |
| H  | -0.0984317 | -1.9818652 | -2.5491789 |
| C  | -2.0049227 | -1.6848025 | -3.4848048 |
| H  | -2.9131104 | -2.2454578 | -3.7528308 |
| H  | -1.5984921 | -1.2413119 | -4.4058977 |
| H  | -2.2952672 | -0.8592267 | -2.8217601 |
| C  | -0.4765767 | -3.6368582 | -3.8655692 |
| H  | -1.3029236 | -4.2743441 | -4.2131740 |
| H  | 0.3069270  | -4.2935117 | -3.4640831 |
| H  | -0.0618411 | -3.1222220 | -4.7446687 |

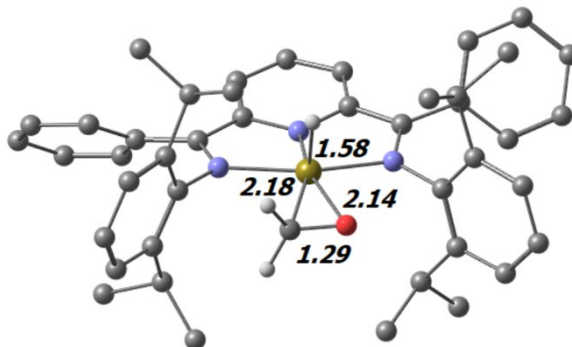

|   |            |            |            |
|---|------------|------------|------------|
| C | 1.8606638  | -3.7163285 | 0.0677774  |
| C | 2.8738301  | -6.3307220 | 0.4550478  |
| C | 2.8078794  | -3.9935919 | 1.0775715  |
| C | 1.4273515  | -4.7902235 | -0.7321385 |
| C | 1.9245706  | -6.0770505 | -0.5383484 |
| C | 3.3133841  | -5.2789530 | 1.2616237  |
| H | 3.1198507  | -3.1904620 | 1.7456764  |
| H | 0.6917403  | -4.6169704 | -1.5122273 |
| H | 1.5683185  | -6.8885611 | -1.1751376 |
| H | 4.0387046  | -5.4625392 | 2.0562091  |
| H | 3.2601495  | -7.3398246 | 0.6045764  |
| C | 1.8729626  | 3.7197589  | -0.1122693 |
| C | 2.8466118  | 6.3452334  | -0.4787237 |
| C | 2.7020109  | 4.0423182  | -1.2054573 |
| C | 1.5395433  | 4.7466532  | 0.7887595  |
| C | 2.0179654  | 6.0421521  | 0.6045480  |
| C | 3.1882231  | 5.3371777  | -1.3822329 |
| H | 2.9371079  | 3.2694414  | -1.9385810 |
| H | 0.8966649  | 4.5286301  | 1.6381527  |
| H | 1.7423081  | 6.8206146  | 1.3178331  |
| H | 3.8211016  | 5.5621365  | -2.2424301 |
| H | 3.2178286  | 7.3612624  | -0.6208177 |
| C | -2.4482149 | -0.6006022 | 0.0956258  |
| O | -2.3928953 | 0.6886783  | 0.1535981  |
| H | -0.7173429 | 0.1671196  | -1.6155758 |
| H | -2.5756250 | -1.1813261 | 1.0258070  |
| H | -2.7959651 | -1.0944816 | -0.8260579 |

**Cpd. TS  $\beta$ -O-H (PDI)IrCH<sub>2</sub>O-H:** Xmol xyz coordinates (Å) and total energy in Hartree of DFT PBE-D3BJ/def2-TZVP optimized geometry (gas phase); Ir: def2-ECP (60e); selected hydrogen atoms with H-H interatomic distances in Å are shown.

99

Energy = -2049.058418777  $\nu(\text{imag})=-1155.71 \text{ cm}^{-1}$

|    |              |              |              |
|----|--------------|--------------|--------------|
| H  | 1.141768829  | 4.550674623  | -2.057098428 |
| C  | 0.991774104  | 4.001460977  | -1.129143639 |
| C  | 0.551354364  | 2.597936134  | 1.267535058  |
| C  | 0.793689746  | 2.621335215  | -1.183026991 |
| C  | 0.995590182  | 4.670523300  | 0.099772962  |
| C  | 0.794673460  | 3.969832481  | 1.295140351  |
| N  | 0.526558409  | 1.952705415  | 0.023538645  |
| H  | 1.170881786  | 5.745639117  | 0.127024194  |
| H  | 0.831036346  | 4.482799676  | 2.255189062  |
| C  | 0.772465531  | 1.749539092  | -2.311766588 |
| C  | 0.371587148  | 1.690135326  | 2.352514807  |
| N  | 0.327759085  | 0.384323417  | 1.973250092  |
| N  | 0.472442976  | 0.454261451  | -2.004124472 |
| Ir | 0.273368654  | 0.082261429  | -0.034646208 |
| He | 0.808720772  | -1.977314353 | 0.027339403  |
| O  | -0.547621680 | -1.966325051 | -0.165660367 |
| H  | -1.098234772 | -0.864704079 | 0.239943708  |
| C  | 0.467875653  | -0.581985117 | -2.989432497 |
| C  | 0.451325803  | -2.692425627 | -4.815847290 |
| C  | 1.696172937  | -1.072633404 | -3.491315683 |
| C  | -0.769201122 | -1.147766477 | -3.381949086 |
| C  | -0.746475642 | -2.197485887 | -4.306953701 |
| C  | 1.657702973  | -2.134719856 | -4.402010323 |
| H  | -1.690711960 | -2.639530816 | -4.630224293 |
| H  | 2.595925229  | -2.528178825 | -4.797705945 |
| H  | 0.444718634  | -3.516486353 | -5.531248564 |
| C  | 0.333715509  | -0.657137473 | 2.952095168  |
| C  | 0.393391748  | -2.682189006 | 4.861750802  |
| C  | 1.570799194  | -1.281992651 | 3.253865342  |
| C  | -0.870435296 | -1.062764862 | 3.559789345  |
| C  | -0.813609364 | -2.082219768 | 4.518455973  |
| C  | 1.570431707  | -2.289362953 | 4.224449221  |
| H  | -1.735138724 | -2.405344705 | 5.006410785  |
| H  | 2.508568114  | -2.782161304 | 4.482568791  |
| H  | 0.418726495  | -3.469639741 | 5.616884471  |
| C  | 3.042768044  | -0.494737076 | -3.081426326 |
| C  | 2.860587055  | -0.877736577 | 2.549504531  |
| C  | -2.204344548 | -0.434466777 | 3.197852867  |
| C  | -2.107133253 | -0.643518080 | -2.857283999 |
| H  | -1.897116757 | 0.038287540  | -2.020617843 |
| H  | 1.355143749  | -2.347334776 | -0.848756820 |
| H  | -2.006644129 | 0.380013517  | 2.485979665  |
| H  | 2.569737025  | -0.505373904 | 1.554275709  |
| H  | 2.857305351  | 0.399817156  | -2.471981678 |
| H  | 1.145248874  | -2.340831595 | 1.007009752  |
| C  | 1.147047918  | 2.211006080  | -3.661120020 |
| C  | 1.953639143  | 3.111334022  | -6.218071837 |
| C  | 0.448923667  | 1.825157081  | -4.820255759 |
| C  | 2.273418673  | 3.044775065  | -3.820838780 |
| C  | 2.665038577  | 3.496105213  | -5.079712566 |
| C  | 0.848520336  | 2.268220153  | -6.079452280 |
| H  | -0.412560130 | 1.167851569  | -4.736310271 |
| H  | 2.869485906  | 3.305785859  | -2.946149571 |
| H  | 3.545955663  | 4.133613618  | -5.172580157 |
| H  | 0.287122791  | 1.951786345  | -6.960080895 |
| H  | 2.264432984  | 3.455545232  | -7.205524045 |
| C  | 0.119968271  | 2.168252802  | 3.728451703  |
| C  | -0.535271815 | 3.136222836  | 6.304896774  |
| C  | -0.808273204 | 3.216718311  | 3.903196228  |
| C  | 0.702177997  | 1.610987952  | 4.882728938  |
| C  | 0.376495642  | 2.090141012  | 6.150676008  |
| C  | -1.127044689 | 3.697461861  | 5.171528533  |
| H  | -1.309465370 | 3.630487463  | 3.027872953  |
| H  | 1.412988590  | 0.794017730  | 4.794920700  |
| H  | 0.843642168  | 1.637695226  | 7.026925554  |
| H  | -1.857030983 | 4.502188461  | 5.273905773  |
| H  | -0.789168763 | 3.504742481  | 7.299854208  |
| C  | 3.845590712  | -1.475905865 | -2.212771547 |
| H  | 4.826565166  | -1.045426058 | -1.960802393 |
| H  | 4.019555362  | -2.424875748 | -2.741899641 |
| H  | 3.324388572  | -1.698197479 | -1.272039843 |
| C  | 3.863542997  | -0.064217511 | -4.306713121 |

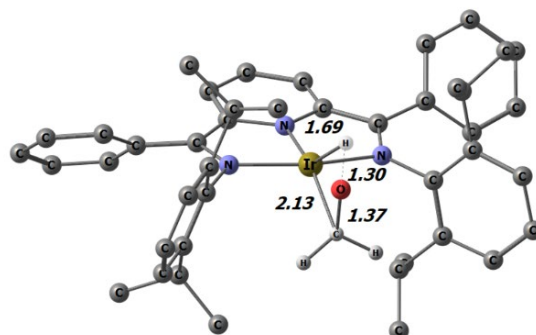

|   |              |              |              |
|---|--------------|--------------|--------------|
| H | 4.168020363  | -0.933607783 | -4.908337720 |
| H | 4.779542492  | 0.454696737  | -3.987593167 |
| H | 3.293065835  | 0.614473562  | -4.953842899 |
| C | 3.590473604  | 0.272132702  | 3.263612633  |
| H | 4.528684202  | 0.505608446  | 2.738282593  |
| H | 3.843417979  | -0.003027762 | 4.299495239  |
| H | 2.987306358  | 1.188903711  | 3.287234291  |
| C | 3.818890963  | -2.055880293 | 2.338054261  |
| H | 4.640052337  | -1.752066633 | 1.672684622  |
| H | 3.311613656  | -2.917244978 | 1.880534385  |
| H | 4.273911630  | -2.393302969 | 3.281772721  |
| C | -3.113885820 | -1.454214625 | 2.493848139  |
| H | -3.377352192 | -2.280407068 | 3.171564902  |
| H | -2.622476856 | -1.892328815 | 1.613473090  |
| H | -4.048872311 | -0.974721294 | 2.167917055  |
| C | -2.902711913 | 0.171380286  | 4.423875843  |
| H | -2.259259848 | 0.901534709  | 4.932206524  |
| H | -3.175839331 | -0.607157158 | 5.152088419  |
| H | -3.829133961 | 0.681305548  | 4.120596910  |
| C | -2.882505455 | 0.147079075  | -3.924400778 |
| H | -2.356237522 | 1.062049065  | -4.228245983 |
| H | -3.865758059 | 0.447252880  | -3.532272568 |
| H | -3.050603153 | -0.463982067 | -4.824376415 |
| C | -2.979863638 | -1.786976488 | -2.318236102 |
| H | -3.331360466 | -2.442751885 | -3.129130459 |
| H | -3.871361718 | -1.376660445 | -1.820661975 |
| H | -2.426304648 | -2.399301696 | -1.596170708 |

**Cpd. (PDI)IrCH<sub>2</sub>OH:** Xmol xyz coordinates (Å) and total energy in Hartree of DFT PBE-D3BJ/def2-TZVP optimized geometry (gas phase); Ir: def2-ECP (60e); selected hydrogen atoms with H-H interatomic distances in Å are shown

99

Energy = -2049.083646611

|    |            |            |            |
|----|------------|------------|------------|
| H  | 2.0029679  | 5.1636407  | 2.0029090  |
| C  | 1.1816484  | 4.5814260  | 2.4187725  |
| C  | -0.9945592 | 3.1286520  | 3.4319277  |
| C  | 0.7032094  | 3.4772128  | 1.7131126  |
| C  | 0.6057504  | 4.9309026  | 3.6455820  |
| C  | -0.4770736 | 4.2061447  | 4.1542699  |
| N  | -0.3621092 | 2.7499659  | 2.2476944  |
| H  | 0.9937875  | 5.7843644  | 4.2012619  |
| H  | -0.9239894 | 4.4729510  | 5.1104836  |
| C  | 1.1194802  | 2.9654331  | 0.4447300  |
| C  | -2.1085546 | 2.2852965  | 3.7418778  |
| N  | -2.3375495 | 1.3026659  | 2.8333385  |
| N  | 0.3098592  | 1.9879760  | -0.0482045 |
| Ir | -1.1504659 | 1.3540284  | 1.1906803  |
| C  | -2.3557491 | 0.2558756  | 0.0635482  |
| O  | -2.2668797 | 0.0173476  | -1.2925754 |
| H  | -3.0304053 | -0.5182799 | -1.5725071 |
| C  | 0.5572318  | 1.4563891  | -1.3537617 |
| C  | 1.0376067  | 0.4672919  | -3.9068360 |
| C  | 1.5491102  | 0.4736245  | -1.5306051 |
| C  | -0.2358437 | 1.9249549  | -2.4289569 |
| C  | 0.0385099  | 1.4197578  | -3.7029237 |
| C  | 1.7705918  | -0.0110550 | -2.8257828 |
| H  | -0.5484430 | 1.7679018  | -4.5534921 |
| H  | 2.5376541  | -0.7709622 | -2.9868615 |
| H  | 1.2327313  | 0.0880392  | -4.9115908 |
| C  | -3.4403887 | 0.4031901  | 2.9746407  |
| C  | -5.5630663 | -1.4058060 | 3.1146966  |
| C  | -3.1806986 | -0.9450435 | 3.3158409  |
| C  | -4.7482467 | 0.8471073  | 2.6731011  |
| C  | -5.7932381 | -0.0812595 | 2.7513286  |
| C  | -4.2645915 | -1.8279206 | 3.3880479  |
| H  | -6.8094229 | 0.2440190  | 2.5206477  |
| H  | -4.0834173 | -2.8688772 | 3.6634121  |
| H  | -6.3941533 | -2.1103869 | 3.1760625  |
| C  | 2.3437840  | -0.0809029 | -0.3614192 |
| H  | 2.1256224  | 0.5421347  | 0.5172525  |
| C  | 1.8812337  | -1.5084472 | -0.0297403 |
| H  | 2.4312763  | -1.9013795 | 0.8387485  |
| H  | 2.0539380  | -2.1872443 | -0.8787741 |
| H  | 0.8083353  | -1.5261734 | 0.2083285  |
| C  | 3.8569012  | -0.0264697 | -0.6088831 |
| H  | 4.4009289  | -0.3586596 | 0.2878601  |
| H  | 4.1834039  | 0.9943143  | -0.8497602 |
| H  | 4.1549125  | -0.6852722 | -1.4383050 |
| C  | -1.7765832 | -1.4574951 | 3.6063755  |
| H  | -1.0771904 | -0.6262874 | 3.4333081  |
| C  | -1.3865538 | -2.5924739 | 2.6479809  |
| H  | -0.3445156 | -2.8986948 | 2.8215522  |
| H  | -1.4763465 | -2.2788142 | 1.5983886  |
| H  | -2.0261396 | -3.4765132 | 2.7901410  |
| C  | -1.6188459 | -1.9224593 | 5.0625899  |
| H  | -0.5974777 | -2.2935582 | 5.2337164  |
| H  | -2.3173474 | -2.7390953 | 5.2996566  |
| H  | -1.7991020 | -1.1078409 | 5.7774431  |
| C  | -5.0434287 | 2.2719100  | 2.2321375  |
| H  | -4.1332747 | 2.8680048  | 2.3814185  |
| C  | -5.3749436 | 2.3264057  | 0.7317890  |
| H  | -5.5892318 | 3.3613361  | 0.4254005  |
| H  | -6.2600874 | 1.7145535  | 0.4998108  |
| H  | -4.5311507 | 1.9635857  | 0.1289653  |
| C  | -6.1635240 | 2.9088086  | 3.0661729  |
| H  | -5.9436776 | 2.8519374  | 4.1405879  |
| H  | -7.1298909 | 2.4139103  | 2.8877786  |
| H  | -6.2814223 | 3.9685748  | 2.7957869  |
| C  | -1.3603585 | 2.9254564  | -2.2018486 |
| H  | -1.7802735 | 2.6936056  | -1.2092085 |
| C  | -2.4936028 | 2.7961171  | -3.2234787 |
| H  | -2.1940229 | 3.1485965  | -4.2227288 |
| H  | -3.3492879 | 3.4105893  | -2.9071616 |
| H  | -2.8316408 | 1.7549388  | -3.3116895 |
| C  | -0.8664584 | 4.3810573  | -2.1506425 |

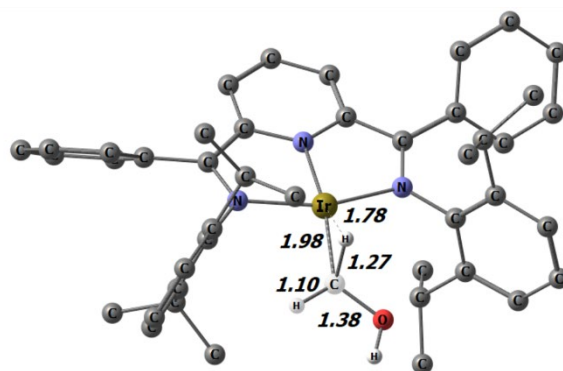

|   |            |            |            |
|---|------------|------------|------------|
| H | -0.3787473 | 4.6670302  | -3.0960224 |
| H | -0.1553850 | 4.5469468  | -1.3310690 |
| H | -1.7176406 | 5.0605494  | -1.9932244 |
| C | 2.3970669  | 3.3836223  | -0.1700819 |
| C | 4.9297917  | 4.0953726  | -1.2125258 |
| C | 3.5364646  | 3.4592827  | 0.6590809  |
| C | 2.5653455  | 3.6670778  | -1.5389243 |
| C | 3.8144481  | 4.0165180  | -2.0490683 |
| C | 4.7829466  | 3.8142101  | 0.1472636  |
| H | 3.4410985  | 3.1998913  | 1.7138173  |
| H | 1.7163696  | 3.6105819  | -2.2145257 |
| H | 3.9134513  | 4.2295598  | -3.1147484 |
| H | 5.6469286  | 3.8522865  | 0.8129901  |
| H | 5.9059613  | 4.3655520  | -1.6180601 |
| C | -2.9740075 | 2.5381586  | 4.9102841  |
| C | -4.6606032 | 3.0947396  | 7.1061150  |
| C | -3.4422271 | 3.8444545  | 5.1550332  |
| C | -3.3811547 | 1.5170678  | 5.7869189  |
| C | -4.2145628 | 1.7922821  | 6.8689811  |
| C | -4.2695163 | 4.1199081  | 6.2425244  |
| H | -3.1790542 | 4.6423332  | 4.4599519  |
| H | -3.0422044 | 0.4977388  | 5.6177762  |
| H | -4.5145616 | 0.9809575  | 7.5342248  |
| H | -4.6255654 | 5.1388528  | 6.4035594  |
| H | -5.3141266 | 3.3074239  | 7.9534012  |
| H | -3.2874695 | -0.1480208 | 0.4935160  |
| H | -1.4012896 | -0.3300127 | 0.6553852  |

**Cpd. (PDI)RhCH<sub>2</sub>OH:** Xmol xyz coordinates (Å) and total energy in Hartree of DFT PBE-D3BJ/def2-TZVP optimized geometry (gas phase); Ir: def2-ECP (60e); selected hydrogen atoms with H-H interatomic distances in Å are shown.

99

Energy = -2055.25819006

|    |            |            |            |
|----|------------|------------|------------|
| H  | 2.1404081  | 0.3598896  | 4.1481147  |
| C  | 1.1955573  | 0.2122881  | 3.6265864  |
| C  | -1.2183242 | -0.0613747 | 2.2430095  |
| C  | 1.1971018  | 0.0432825  | 2.2407438  |
| C  | -0.0159103 | 0.1930972  | 4.3259563  |
| C  | -1.2248602 | 0.0588303  | 3.6358730  |
| N  | -0.0063034 | -0.1339756 | 1.5762373  |
| H  | -0.0195415 | 0.3068907  | 5.4097531  |
| H  | -2.1719862 | 0.0473202  | 4.1723262  |
| C  | 2.3143551  | 0.0887240  | 1.3358711  |
| C  | -2.3398051 | -0.1516653 | 1.3437797  |
| N  | -2.0052313 | -0.2296569 | 0.0422466  |
| N  | 1.9623842  | 0.1666777  | 0.0351362  |
| Rh | -0.0098897 | -0.0853970 | -0.3480916 |
| C  | -0.2403295 | 0.3801102  | -2.2707316 |
| O  | 0.7201140  | 0.8740714  | -3.1467254 |
| H  | 0.2684047  | 1.2850524  | -3.9035996 |
| C  | 2.9631005  | 0.2993398  | -0.9723032 |
| C  | 4.9284387  | 0.6145526  | -2.9143907 |
| C  | 3.6874628  | -0.8293140 | -1.4024614 |
| C  | 3.1639331  | 1.5797898  | -1.5429883 |
| C  | 4.1695892  | 1.7114395  | -2.5038871 |
| C  | 4.6717145  | -0.6444591 | -2.3813007 |
| H  | 4.3552756  | 2.6875758  | -2.9527578 |
| H  | 5.2485035  | -1.5049486 | -2.7258396 |
| H  | 5.7086845  | 0.7420835  | -3.6668521 |
| C  | -2.9940254 | -0.3144226 | -0.9804382 |
| C  | -4.8303390 | -0.4763313 | -3.0791232 |
| C  | -3.1414526 | -1.5352146 | -1.6819399 |
| C  | -3.7291447 | 0.8366856  | -1.3474370 |
| C  | -4.6424690 | 0.7264029  | -2.4022720 |
| C  | -4.0774821 | -1.5915163 | -2.7207313 |
| H  | -5.2174385 | 1.6051984  | -2.6998249 |
| H  | -4.2144612 | -2.5296384 | -3.2622520 |
| H  | -5.5542388 | -0.5407683 | -3.8930967 |
| C  | 3.4002482  | -2.2192664 | -0.8626487 |
| H  | 2.6958036  | -2.1156402 | -0.0249652 |
| C  | 2.7065699  | -3.0758912 | -1.9344102 |
| H  | 2.4643305  | -4.0728025 | -1.5358996 |
| H  | 3.3557526  | -3.2072684 | -2.8129332 |
| H  | 1.7719682  | -2.6046598 | -2.2699293 |
| C  | 4.6639344  | -2.9087417 | -0.3304574 |
| H  | 4.4049373  | -3.8733462 | 0.1311746  |
| H  | 5.1666970  | -2.2899365 | 0.4249757  |
| H  | 5.3836130  | -3.1121986 | -1.1378360 |
| C  | -2.3274136 | -2.7744166 | -1.3342158 |
| H  | -1.5756610 | -2.4754759 | -0.5882130 |
| C  | -1.5741316 | -3.3187766 | -2.5556234 |
| H  | -0.9067423 | -4.1404541 | -2.2571834 |
| H  | -0.9623685 | -2.5383992 | -3.0298582 |
| H  | -2.2658798 | -3.7093811 | -3.3169052 |
| C  | -3.1954749 | -3.8803640 | -0.7146548 |
| H  | -2.5816929 | -4.7661627 | -0.4934904 |
| H  | -3.9978239 | -4.1899164 | -1.4019474 |
| H  | -3.6628876 | -3.5587613 | 0.2261111  |
| C  | -3.5188781 | 2.1826408  | -0.6722868 |
| H  | -2.9092161 | 2.0197779  | 0.2263060  |
| C  | -2.7230464 | 3.1313048  | -1.5837846 |
| H  | -2.5777040 | 4.1041018  | -1.0902949 |
| H  | -3.2553004 | 3.3075112  | -2.5311540 |
| H  | -1.7316404 | 2.7151245  | -1.8107134 |
| C  | -4.8420425 | 2.8213698  | -0.2299778 |
| H  | -5.4251134 | 2.1359187  | 0.3992389  |
| H  | -5.4631383 | 3.1058698  | -1.0926466 |
| H  | -4.6460205 | 3.7357897  | 0.3492202  |
| C  | 2.2928318  | 2.7587576  | -1.1366492 |
| H  | 1.2860526  | 2.3420616  | -0.9609773 |
| C  | 2.1704586  | 3.8228038  | -2.2305226 |
| H  | 3.1051517  | 4.3897245  | -2.3654899 |
| H  | 1.3898981  | 4.5470035  | -1.9558675 |
| H  | 1.8991580  | 3.3731790  | -3.1953491 |
| C  | 2.7458452  | 3.4126431  | 0.1796122  |

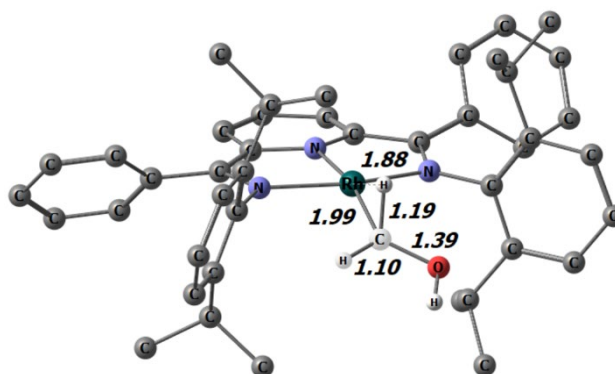



|   |            |            |            |
|---|------------|------------|------------|
| H | 3.7734267  | 3.8002802  | 0.0951908  |
| H | 2.7111521  | 2.7086893  | 1.0215259  |
| H | 2.0863224  | 4.2578380  | 0.4279361  |
| C | 3.6999259  | -0.0505797 | 1.8329364  |
| C | 6.3127132  | -0.4913736 | 2.8175449  |
| C | 3.9591844  | -1.0446363 | 2.7999826  |
| C | 4.7871394  | 0.7133614  | 1.3682206  |
| C | 6.0736544  | 0.4939199  | 1.8569313  |
| C | 5.2466037  | -1.2611466 | 3.2870761  |
| H | 3.1389873  | -1.6760430 | 3.1426610  |
| H | 4.6292848  | 1.4833349  | 0.6176236  |
| H | 6.8979209  | 1.1010781  | 1.4793597  |
| H | 5.4186072  | -2.0466445 | 4.0248090  |
| H | 7.3231537  | -0.6625571 | 3.1918041  |
| C | -3.7327231 | -0.0698093 | 1.8323336  |
| C | -6.3837010 | 0.1783549  | 2.7686568  |
| C | -4.0947728 | 0.9600883  | 2.7228065  |
| C | -4.7336228 | -0.9626580 | 1.4115647  |
| C | -6.0417195 | -0.8399984 | 1.8755438  |
| C | -5.4033242 | 1.0795459  | 3.1884410  |
| H | -3.3455765 | 1.6939558  | 3.0207591  |
| H | -4.4846352 | -1.7570820 | 0.7119755  |
| H | -6.7996390 | -1.5474465 | 1.5354563  |
| H | -5.6606102 | 1.8926114  | 3.8692543  |
| H | -7.4094710 | 0.2741716  | 3.1275575  |
| H | -1.2648785 | 0.5203143  | -2.6466943 |
| H | -0.0539953 | -0.7781879 | -2.0994415 |

**Cpd. (PDI) (H) Ir=C(H) (OH) :** (hydroxycarbene) Xmol xyz coordinates (Å) and total energy in Hartree of DFT PBE-D3BJ/def2-TZVP optimized geometry (gas phase); Ir: def2-ECP (60e); selected hydrogen atoms with H-H interatomic distances in Å are shown

99

Energy =-2049.095638964

|    |            |            |            |
|----|------------|------------|------------|
| H  | 2.0677532  | 5.1263723  | 2.0851768  |
| C  | 1.2405306  | 4.5419922  | 2.4857148  |
| C  | -0.9506451 | 3.0903504  | 3.4792619  |
| C  | 0.7409682  | 3.4584900  | 1.7608125  |
| C  | 0.6661773  | 4.8706713  | 3.7216967  |
| C  | -0.4170092 | 4.1435557  | 4.2276468  |
| N  | -0.3414802 | 2.7630186  | 2.2761758  |
| H  | 1.0653943  | 5.7086379  | 4.2933377  |
| H  | -0.8495751 | 4.3915999  | 5.1961641  |
| C  | 1.1472531  | 2.9678221  | 0.4746160  |
| C  | -2.0637593 | 2.2449537  | 3.7750840  |
| N  | -2.3104693 | 1.2781065  | 2.8394321  |
| N  | 0.3460135  | 1.9901260  | -0.0338913 |
| Ir | -1.0667511 | 1.2579166  | 1.2324291  |
| C  | -1.9556489 | 0.1066910  | -0.0319492 |
| O  | -3.0769917 | -0.6245098 | 0.0548200  |
| H  | -3.4468282 | -0.5352874 | 0.9657837  |
| C  | 0.5617857  | 1.4731858  | -1.3494993 |
| C  | 0.9144292  | 0.4353506  | -3.9140563 |
| C  | 1.5466238  | 0.4863444  | -1.5642291 |
| C  | -0.2737280 | 1.9257541  | -2.3985644 |
| C  | -0.0683594 | 1.3933706  | -3.6769611 |
| C  | 1.7039791  | -0.0175954 | -2.8604199 |
| H  | -0.6944813 | 1.7371528  | -4.5026895 |
| H  | 2.4630361  | -0.7801145 | -3.0455911 |
| H  | 1.0570036  | 0.0335292  | -4.9185871 |
| C  | -3.4711464 | 0.4497669  | 2.9359871  |
| C  | -5.7194146 | -1.2141393 | 2.8982674  |
| C  | -3.3395091 | -0.9089236 | 3.3234324  |
| C  | -4.7253199 | 0.9808371  | 2.5436239  |
| C  | -5.8325820 | 0.1244960  | 2.5321965  |
| C  | -4.4819831 | -1.7182389 | 3.2908168  |
| H  | -6.8022567 | 0.5165441  | 2.2206788  |
| H  | -4.3965873 | -2.7669253 | 3.5809853  |
| H  | -6.5945727 | -1.8651832 | 2.8754588  |
| C  | 2.4084400  | -0.0490562 | -0.4348635 |
| H  | 2.1881735  | 0.5430571  | 0.4642235  |
| C  | 2.0443313  | -1.5090071 | -0.1234461 |
| H  | 2.6351318  | -1.8801901 | 0.7274587  |
| H  | 2.2483000  | -2.1598914 | -0.9871986 |
| H  | 0.9791570  | -1.6028843 | 0.1301609  |
| C  | 3.9060633  | 0.0975214  | -0.7380524 |
| H  | 4.5028284  | -0.2285055 | 0.1268100  |
| H  | 4.1679697  | 1.1403767  | -0.9617225 |
| H  | 4.2039485  | -0.5210648 | -1.5979891 |
| C  | -2.0096481 | -1.5094286 | 3.7535914  |
| H  | -1.2829657 | -0.6868223 | 3.8241398  |
| C  | -1.4876235 | -2.5073575 | 2.7073445  |
| H  | -0.5101232 | -2.9070164 | 3.0159176  |
| H  | -1.3667465 | -2.0321810 | 1.7260737  |
| H  | -2.1804795 | -3.3551543 | 2.5952797  |
| C  | -2.0963984 | -2.1968842 | 5.1255965  |
| H  | -1.1007781 | -2.5498118 | 5.4312942  |
| H  | -2.7619223 | -3.0721662 | 5.0950028  |
| H  | -2.4702536 | -1.5238559 | 5.9095495  |
| C  | -4.8858671 | 2.4202840  | 2.0849951  |
| H  | -3.9540299 | 2.9537683  | 2.3170527  |
| C  | -5.0799386 | 2.4837501  | 0.5617919  |
| H  | -5.1669768 | 3.5292757  | 0.2300097  |
| H  | -5.9946263 | 1.9528139  | 0.2575430  |
| H  | -4.2296287 | 2.0281116  | 0.0366969  |
| C  | -6.0265847 | 3.1341656  | 2.8222056  |
| H  | -5.8942870 | 3.0774622  | 3.9111129  |
| H  | -7.0057298 | 2.6993504  | 2.5718553  |
| H  | -6.0552551 | 4.1954863  | 2.5344366  |
| C  | -1.3640767 | 2.9684359  | -2.1859138 |
| H  | -1.4304090 | 3.1610148  | -1.1047722 |
| C  | -2.7358152 | 2.4547768  | -2.6464285 |
| H  | -2.7554446 | 2.2771422  | -3.7320075 |
| H  | -3.5156070 | 3.1955217  | -2.4159236 |
| H  | -3.0023804 | 1.5139693  | -2.1466056 |
| C  | -1.0359791 | 4.2982696  | -2.8836722 |

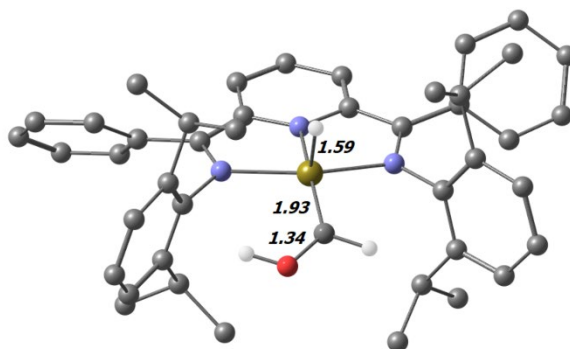

|   |            |            |            |
|---|------------|------------|------------|
| H | -0.9098121 | 4.1579674  | -3.9680492 |
| H | -0.1159939 | 4.7521944  | -2.4911001 |
| H | -1.8535275 | 5.0185515  | -2.7309556 |
| C | 2.3967593  | 3.4278850  | -0.1625671 |
| C | 4.8696671  | 4.2359204  | -1.2749683 |
| C | 3.5626721  | 3.5123830  | 0.6279442  |
| C | 2.5087548  | 3.7490226  | -1.5283264 |
| C | 3.7280257  | 4.1455423  | -2.0744538 |
| C | 4.7792023  | 3.9166698  | 0.0813997  |
| H | 3.5129388  | 3.2203386  | 1.6772035  |
| H | 1.6362181  | 3.6832932  | -2.1728489 |
| H | 3.7830625  | 4.3878427  | -3.1370516 |
| H | 5.6655502  | 3.9622146  | 0.7165518  |
| H | 5.8229077  | 4.5438478  | -1.7070688 |
| C | -2.9243502 | 2.4697293  | 4.9497475  |
| C | -4.6002826 | 2.9541788  | 7.1713899  |
| C | -3.4176490 | 3.7617666  | 5.2202181  |
| C | -3.2939591 | 1.4286295  | 5.8195440  |
| C | -4.1242878 | 1.6661479  | 6.9122629  |
| C | -4.2389113 | 4.0014489  | 6.3210623  |
| H | -3.1767728 | 4.5759834  | 4.5355321  |
| H | -2.9136077 | 0.4259178  | 5.6395950  |
| H | -4.3951100 | 0.8394160  | 7.5713176  |
| H | -4.6142956 | 5.0099045  | 6.5035177  |
| H | -5.2503800 | 3.1392433  | 8.0277075  |
| H | -0.2369025 | -0.0342120 | 1.6282293  |
| H | -1.5714007 | -0.0356173 | -1.0605726 |

.

**Cpd. (PDI) (H)Rh=C(H) (OH) :** (hydroxycarbene) Xmol xyz coordinates (Å) and total energy in Hartree of DFT PBE-D3BJ/def2-TZVP optimized geometry (gas phase); Ir: def2-ECP (60e); selected hydrogen atoms with H-H interatomic distances in Å are shown

99

Energy = -2055.265707362

|    |            |            |            |
|----|------------|------------|------------|
| H  | 2.0715050  | 5.1146366  | 2.0766468  |
| C  | 1.2466711  | 4.5311331  | 2.4837710  |
| C  | -0.9378132 | 3.0845686  | 3.4753936  |
| C  | 0.7418704  | 3.4455725  | 1.7651522  |
| C  | 0.6758047  | 4.8654748  | 3.7197570  |
| C  | -0.4084757 | 4.1398863  | 4.2246851  |
| N  | -0.3308409 | 2.7491294  | 2.2808426  |
| H  | 1.0740999  | 5.7066633  | 4.2872521  |
| H  | -0.8472835 | 4.3924690  | 5.1893000  |
| C  | 1.1430255  | 2.9615699  | 0.4703594  |
| C  | -2.0587095 | 2.2456537  | 3.7756604  |
| N  | -2.3166972 | 1.2898724  | 2.8435668  |
| N  | 0.3253656  | 2.0135585  | -0.0488202 |
| Rh | -1.0720994 | 1.2627359  | 1.2349576  |
| C  | -1.9314504 | 0.0889745  | -0.0009785 |
| O  | -3.0120966 | -0.6868895 | 0.1038509  |
| H  | -3.3848771 | -0.6038812 | 1.0163473  |
| C  | 0.5440107  | 1.4864745  | -1.3550010 |
| C  | 0.9105641  | 0.4566631  | -3.9234759 |
| C  | 1.5336886  | 0.5029329  | -1.5703465 |
| C  | -0.2962244 | 1.9281803  | -2.4056664 |
| C  | -0.0825756 | 1.4039157  | -3.6856672 |
| C  | 1.6978135  | 0.0043350  | -2.8678210 |
| H  | -0.7103117 | 1.7438374  | -4.5116594 |
| H  | 2.4611584  | -0.7539611 | -3.0527634 |
| H  | 1.0613018  | 0.0608841  | -4.9292123 |
| C  | -3.4724096 | 0.4618150  | 2.9354111  |
| C  | -5.7179699 | -1.2094859 | 2.8612876  |
| C  | -3.3446624 | -0.8985585 | 3.3225993  |
| C  | -4.7240735 | 0.9883725  | 2.5254144  |
| C  | -5.8292895 | 0.1307453  | 2.4984391  |
| C  | -4.4850099 | -1.7112859 | 3.2697344  |
| H  | -6.7952103 | 0.5217484  | 2.1744958  |
| H  | -4.4006272 | -2.7605574 | 3.5578307  |
| H  | -6.5908212 | -1.8627360 | 2.8235089  |
| C  | 2.3904915  | -0.0399482 | -0.4405758 |
| H  | 2.1686398  | 0.5472231  | 0.4612401  |
| C  | 2.0173120  | -1.4997532 | -0.1384622 |
| H  | 2.6078112  | -1.8813890 | 0.7080317  |
| H  | 2.2133152  | -2.1459086 | -1.0075193 |
| H  | 0.9525011  | -1.5867299 | 0.1194801  |
| C  | 3.8898924  | 0.0987816  | -0.7373879 |
| H  | 4.4810503  | -0.2310546 | 0.1300392  |
| H  | 4.1591420  | 1.1396931  | -0.9601636 |
| H  | 4.1881590  | -0.5219223 | -1.5957489 |
| C  | -2.0215791 | -1.4952188 | 3.7800338  |
| H  | -1.3019151 | -0.6683158 | 3.8742947  |
| C  | -1.4638802 | -2.4835807 | 2.7435961  |
| H  | -0.5052552 | -2.8970862 | 3.0900640  |
| H  | -1.2914441 | -1.9957378 | 1.7763790  |
| H  | -2.1596031 | -3.3220423 | 2.5892491  |
| C  | -2.1417951 | -2.1949247 | 5.1436636  |
| H  | -1.1494595 | -2.5221098 | 5.4857226  |
| H  | -2.7795904 | -3.0890637 | 5.0809297  |
| H  | -2.5678362 | -1.5407299 | 5.9168365  |
| C  | -4.8766230 | 2.4271454  | 2.0619464  |
| H  | -3.9499928 | 2.9611713  | 2.3131145  |
| C  | -5.0329519 | 2.4856496  | 0.5344431  |
| H  | -5.1085021 | 3.5301740  | 0.1962789  |
| H  | -5.9411767 | 1.9563136  | 0.2081350  |
| H  | -4.1702494 | 2.0254688  | 0.0341417  |
| C  | -6.0323803 | 3.1430319  | 2.7720261  |
| H  | -5.9192047 | 3.0942211  | 3.8635609  |
| H  | -7.0061131 | 2.7047104  | 2.5072463  |
| H  | -6.0584386 | 4.2021923  | 2.4764017  |
| C  | -1.4007581 | 2.9531694  | -2.1852260 |
| H  | -1.4833051 | 3.1165214  | -1.1004304 |
| C  | -2.7592595 | 2.4352284  | -2.6779327 |
| H  | -2.7646739 | 2.2868542  | -3.7680834 |
| H  | -3.5521905 | 3.1581646  | -2.4364663 |
| H  | -3.0186592 | 1.4767076  | -2.2074748 |
| C  | -1.0738844 | 4.3035957  | -2.8418177 |

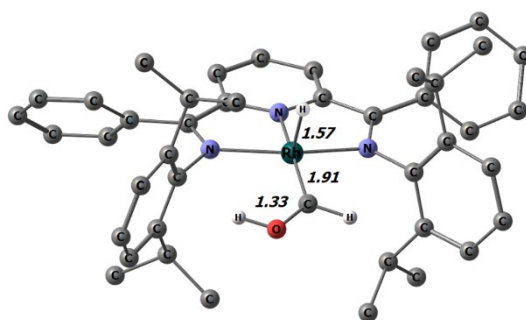

|   |            |            |            |
|---|------------|------------|------------|
| H | -0.9253947 | 4.1928239  | -3.9268671 |
| H | -0.1656579 | 4.7541601  | -2.4190339 |
| H | -1.9005249 | 5.0128426  | -2.6857307 |
| C | 2.3981490  | 3.4174750  | -0.1602064 |
| C | 4.8726171  | 4.2259164  | -1.2661797 |
| C | 3.5633622  | 3.4941026  | 0.6318772  |
| C | 2.5107400  | 3.7462147  | -1.5244060 |
| C | 3.7308870  | 4.1441825  | -2.0669511 |
| C | 4.7813549  | 3.8982219  | 0.0880963  |
| H | 3.5120013  | 3.1965522  | 1.6793708  |
| H | 1.6375596  | 3.6865579  | -2.1688080 |
| H | 3.7874650  | 4.3936609  | -3.1277286 |
| H | 5.6676717  | 3.9378985  | 0.7235350  |
| H | 5.8268046  | 4.5340082  | -1.6960680 |
| C | -2.9065895 | 2.4696493  | 4.9612365  |
| C | -4.5688105 | 2.9422004  | 7.1930514  |
| C | -3.4211604 | 3.7547480  | 5.2230695  |
| C | -3.2465691 | 1.4294621  | 5.8432806  |
| C | -4.0691570 | 1.6613561  | 6.9429254  |
| C | -4.2376870 | 3.9881492  | 6.3290200  |
| H | -3.2008619 | 4.5669731  | 4.5289805  |
| H | -2.8455102 | 0.4335371  | 5.6685821  |
| H | -4.3163519 | 0.8367196  | 7.6138400  |
| H | -4.6316098 | 4.9904729  | 6.5057943  |
| H | -5.2137594 | 3.1231245  | 8.0540858  |
| H | -0.2241283 | 0.0032710  | 1.6168472  |
| H | -1.5346501 | -0.0440253 | -1.0260628 |

**Cpd. Ir(H)( $\eta^2$ CH<sub>2</sub>O):** Xmol xyz coordinates (Å) and total energy in Hartree of DFT PBE-D3BJ/def2-TZVP optimized geometry (gas phase); Ir: def2-ECP (60e); selected hydrogen atoms with H-H interatomic distances in Å are shown.

99

Energy = -2049.095651245

|    |            |            |            |
|----|------------|------------|------------|
| H  | 4.3797377  | 0.1588537  | -1.8974918 |
| C  | 3.8102673  | 0.1017277  | -0.9712461 |
| C  | 2.3488328  | 0.0669588  | 1.4328366  |
| C  | 2.4246975  | 0.2630781  | -1.0113575 |
| C  | 4.4535391  | -0.1214949 | 0.2516272  |
| C  | 3.7288067  | -0.1412363 | 1.4483482  |
| N  | 1.7241424  | 0.2371833  | 0.1951136  |
| H  | 5.5329216  | -0.2693227 | 0.2733812  |
| H  | 4.2299392  | -0.3125657 | 2.3998373  |
| C  | 1.5685826  | 0.4881348  | -2.1344812 |
| C  | 1.4222725  | 0.0906829  | 2.5234810  |
| N  | 0.1263970  | 0.2322151  | 2.1386377  |
| N  | 0.2704783  | 0.7252614  | -1.8108706 |
| Ir | -0.1264851 | 0.6795452  | 0.1824175  |
| C  | -0.7546999 | 0.7997798  | -2.8097044 |
| C  | -2.9204870 | 0.8993350  | -4.5662378 |
| C  | -1.2089498 | -0.3956315 | -3.4164232 |
| C  | -1.3587328 | 2.0472333  | -3.0919124 |
| C  | -2.4432085 | 2.0658067  | -3.9756908 |
| C  | -2.2998354 | -0.3154342 | -4.2897007 |
| H  | -2.9233645 | 3.0192344  | -4.2039030 |
| H  | -2.6701610 | -1.2280706 | -4.7606841 |
| H  | -3.7731909 | 0.9374777  | -5.2460807 |
| C  | -0.9392770 | 0.0508588  | 3.0739205  |
| C  | -3.0067040 | -0.3468934 | 4.8885550  |
| C  | -1.5330513 | -1.2329308 | 3.1639149  |
| C  | -1.3875205 | 1.1384501  | 3.8463054  |
| C  | -2.4298830 | 0.9119845  | 4.7533313  |
| C  | -2.5651629 | -1.4040798 | 4.0932289  |
| H  | -2.7913512 | 1.7401963  | 5.3653389  |
| H  | -3.0370631 | -2.3822771 | 4.1926502  |
| H  | -3.8139778 | -0.5051712 | 5.6055616  |
| C  | -0.5676311 | -1.7516014 | -3.1592850 |
| H  | 0.3191066  | -1.5974489 | -2.5288276 |
| C  | -1.5048316 | -2.7028259 | -2.3982870 |
| H  | -1.0198133 | -3.6805049 | -2.2569409 |
| H  | -2.4398902 | -2.8684622 | -2.9540881 |
| H  | -1.7636170 | -2.3073548 | -1.4073256 |
| C  | -0.0998759 | -2.3971710 | -4.4732334 |
| H  | 0.4625268  | -3.3196883 | -4.2654751 |
| H  | 0.5486434  | -1.7202248 | -5.0441503 |
| H  | -0.9557736 | -2.6662502 | -5.1100644 |
| C  | -1.0711831 | -2.3980741 | 2.2946776  |
| H  | -0.6461108 | -1.9608936 | 1.3773421  |
| C  | -2.2243408 | -3.3179987 | 1.8731783  |
| H  | -1.8749318 | -4.0274573 | 1.1091710  |
| H  | -3.0667433 | -2.7510768 | 1.4519847  |
| H  | -2.6051492 | -3.9109492 | 2.7180799  |
| C  | 0.0420501  | -3.2279726 | 2.9549224  |
| H  | 0.3099264  | -4.0786914 | 2.3103046  |
| H  | -0.2895866 | -3.6306681 | 3.9244403  |
| H  | 0.9523780  | -2.6379471 | 3.1202525  |
| C  | -0.7804496 | 2.5219354  | 3.7066252  |
| H  | 0.0867748  | 2.4387328  | 3.0361324  |
| C  | -1.7809761 | 3.4800649  | 3.0417576  |
| H  | -1.3176396 | 4.4647928  | 2.8779942  |
| H  | -2.6665383 | 3.6252381  | 3.6792322  |
| H  | -2.1151032 | 3.0803995  | 2.0750817  |
| C  | -0.2765831 | 3.0671513  | 5.0498589  |
| H  | 0.4466312  | 2.3824071  | 5.5143005  |
| H  | -1.1042493 | 3.2206754  | 5.7585881  |
| H  | 0.2158201  | 4.0398383  | 4.9025580  |
| C  | -0.8616392 | 3.3571742  | -2.4973049 |
| H  | 0.0365549  | 3.1332974  | -1.9033985 |
| C  | -1.9030158 | 3.9773866  | -1.5534290 |
| H  | -2.8046017 | 4.2741291  | -2.1122224 |
| H  | -1.4929884 | 4.8815400  | -1.0782943 |
| H  | -2.1989780 | 3.2640315  | -0.7753513 |
| C  | -0.4747728 | 4.3752824  | -3.5839632 |
| H  | -1.3503097 | 4.6733676  | -4.1791893 |
| H  | 0.2820828  | 3.9882752  | -4.2808102 |
| H  | -0.0668588 | 5.2837332  | -3.1170038 |

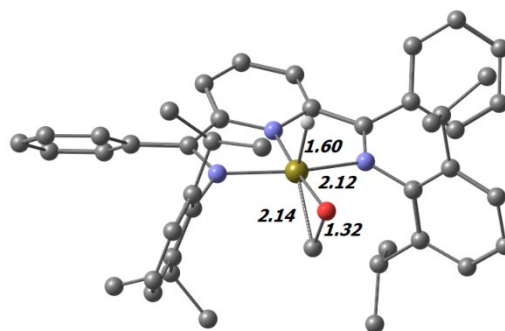

|   |            |            |            |
|---|------------|------------|------------|
| C | 2.0682731  | 0.3854219  | -3.5170860 |
| C | 3.0316199  | 0.1315913  | -6.1569294 |
| C | 2.8981118  | -0.6915388 | -3.8857802 |
| C | 1.7307549  | 1.3285338  | -4.5026940 |
| C | 2.2032957  | 1.2010756  | -5.8066696 |
| C | 3.3788150  | -0.8127991 | -5.1886291 |
| H | 3.1347265  | -1.4589479 | -3.1480830 |
| H | 1.0958029  | 2.1701452  | -4.2382365 |
| H | 1.9258172  | 1.9466233  | -6.5535802 |
| H | 4.0110989  | -1.6619897 | -5.4528581 |
| H | 3.3993059  | 0.0321388  | -7.1792091 |
| C | 1.8733605  | 0.1391174  | 3.9315670  |
| C | 2.7737462  | 0.4445779  | 6.5960171  |
| C | 2.9109659  | 1.0390068  | 4.2561010  |
| C | 1.2892234  | -0.5922452 | 4.9827327  |
| C | 1.7363166  | -0.4393583 | 6.2943112  |
| C | 3.3582738  | 1.1859940  | 5.5675382  |
| H | 3.3415813  | 1.6574738  | 3.4682611  |
| H | 0.4747123  | -1.2821308 | 4.7817017  |
| H | 1.2635601  | -1.0195433 | 7.0883140  |
| H | 4.1550597  | 1.8984917  | 5.7871646  |
| H | 3.1165498  | 0.5624224  | 7.6249752  |
| C | -2.1623070 | 0.0342298  | -0.0007202 |
| O | -2.1484883 | 1.3217102  | 0.2746839  |
| H | 0.0604943  | 2.2480867  | 0.4232752  |
| H | -2.4633507 | -0.6631989 | 0.7996167  |
| H | -2.4151426 | -0.2719717 | -1.0303261 |

**Cpd. TS  $\beta$ -elim. Ir(OMe):** Xmol xyz coordinates (Å) and total energy in Hartree of DFT PBE-D3BJ/def2-TZVP optimized geometry (gas phase); Ir: def2-ECP (60e); selected hydrogen atoms with H-H interatomic distances in Å are shown.

99

Energy = -2049.084702476  $\nu(\text{imag}) = -613.24 \text{ cm}^{-1}$

|    |            |            |            |
|----|------------|------------|------------|
| H  | 4.4321608  | 0.3607709  | -1.9796695 |
| C  | 3.8764611  | 0.2843873  | -1.0461325 |
| C  | 2.4385169  | 0.1496216  | 1.3697738  |
| C  | 2.4823453  | 0.2916639  | -1.0836591 |
| C  | 4.5472321  | 0.1774209  | 0.1770797  |
| C  | 3.8320004  | 0.0979250  | 1.3774923  |
| N  | 1.7826292  | 0.2303293  | 0.1314447  |
| H  | 5.6363765  | 0.1516357  | 0.1951446  |
| H  | 4.3533236  | -0.0129384 | 2.3271888  |
| C  | 1.6026701  | 0.3916642  | -2.2055839 |
| C  | 1.5173352  | 0.0779428  | 2.4618288  |
| N  | 0.2173938  | 0.0208924  | 2.0776412  |
| N  | 0.2901787  | 0.4712375  | -1.8694074 |
| Ir | -0.1008691 | 0.2639650  | 0.0978095  |
| C  | -0.7355725 | 0.6673786  | -2.8480956 |
| C  | -2.8253286 | 1.0532908  | -4.6512673 |
| C  | -1.2430117 | -0.4403932 | -3.5585391 |
| C  | -1.2661308 | 1.9691683  | -3.0210940 |
| C  | -2.3110692 | 2.1335253  | -3.9368176 |
| C  | -2.2941527 | -0.2182212 | -4.4563805 |
| H  | -2.7289165 | 3.1301031  | -4.0939734 |
| H  | -2.7021509 | -1.0638349 | -5.0132676 |
| H  | -3.6431400 | 1.2037003  | -5.3580190 |
| C  | -0.8504047 | -0.1013388 | 3.0200422  |
| C  | -2.9717458 | -0.3599010 | 4.8040816  |
| C  | -1.4905585 | -1.3584333 | 3.1462563  |
| C  | -1.2830357 | 1.0313583  | 3.7421828  |
| C  | -2.3509048 | 0.8738473  | 4.6335734  |
| C  | -2.5456924 | -1.4586337 | 4.0597769  |
| H  | -2.6981967 | 1.7363590  | 5.2057797  |
| H  | -3.0495934 | -2.4179784 | 4.1848284  |
| H  | -3.7987416 | -0.4643799 | 5.5085617  |
| C  | -0.6920941 | -1.8435739 | -3.3764376 |
| H  | 0.1547045  | -1.7832580 | -2.6780854 |
| C  | -1.7407436 | -2.7708071 | -2.7426270 |
| H  | -1.3120505 | -3.7706339 | -2.5757599 |
| H  | -2.6137297 | -2.8873966 | -3.4032957 |
| H  | -2.0821253 | -2.3663187 | -1.7806885 |
| C  | -0.1695112 | -2.4165005 | -4.7024627 |
| H  | 0.2960405  | -3.3989479 | -4.5339215 |
| H  | 0.5785767  | -1.7561337 | -5.1613906 |
| H  | -0.9880799 | -2.5573343 | -5.4244224 |
| C  | -1.0475635 | -2.5770945 | 2.3476915  |
| H  | -0.5254894 | -2.2037887 | 1.4559762  |
| C  | -2.2324440 | -3.4155894 | 1.8547018  |
| H  | -1.8744024 | -4.1885222 | 1.1589794  |
| H  | -2.9563535 | -2.7870324 | 1.3212288  |
| H  | -2.7467923 | -3.9329286 | 2.6792295  |
| C  | -0.0602973 | -3.4554195 | 3.1345236  |
| H  | 0.1891645  | -4.3552122 | 2.5523371  |
| H  | -0.4952641 | -3.7831369 | 4.0918103  |
| H  | 0.8806215  | -2.9299005 | 3.3469211  |
| C  | -0.6462380 | 2.3996352  | 3.5644179  |
| H  | 0.2202589  | 2.2855232  | 2.8982020  |
| C  | -1.6204203 | 3.3731327  | 2.8827311  |
| H  | -1.1423516 | 4.3520012  | 2.7283812  |
| H  | -2.5201276 | 3.5278456  | 3.4969941  |
| H  | -1.9414764 | 2.9949299  | 1.9019982  |
| C  | -0.1442033 | 2.9737039  | 4.8969735  |
| H  | 0.5433743  | 2.2798108  | 5.3981498  |
| H  | -0.9796805 | 3.1800652  | 5.5826733  |
| H  | 0.3874608  | 3.9217968  | 4.7274588  |
| C  | -0.7326948 | 3.1821054  | -2.2671032 |
| H  | 0.0343106  | 2.8279782  | -1.5636848 |
| C  | -1.8321865 | 3.8701434  | -1.4436690 |
| H  | -2.6178715 | 4.2853048  | -2.0923118 |
| H  | -1.4076574 | 4.6989413  | -0.8583256 |
| H  | -2.3128480 | 3.1746552  | -0.7429653 |
| C  | -0.0777065 | 4.2073525  | -3.2072472 |
| H  | -0.7922087 | 4.5693189  | -3.9617694 |
| H  | 0.7893709  | 3.7897102  | -3.7361938 |
| H  | 0.2730673  | 5.0773946  | -2.6324543 |

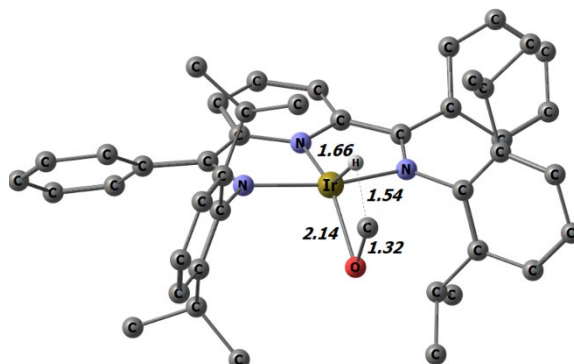



|   |            |            |            |
|---|------------|------------|------------|
| C | 2.0946747  | 0.2818997  | -3.5934579 |
| C | 3.0440187  | -0.0797217 | -6.2299253 |
| C | 3.0122798  | -0.7426334 | -3.9037836 |
| C | 1.6567063  | 1.1116988  | -4.6405541 |
| C | 2.1258533  | 0.9318470  | -5.9405035 |
| C | 3.4843190  | -0.9174740 | -5.2032241 |
| H | 3.3256452  | -1.4306098 | -3.1181932 |
| H | 0.9358883  | 1.8994441  | -4.4397319 |
| H | 1.7680534  | 1.5903467  | -6.7336084 |
| H | 4.1850398  | -1.7262818 | -5.4169255 |
| H | 3.4061734  | -0.2201999 | -7.2493716 |
| C | 1.9642531  | 0.1871294  | 3.8653838  |
| C | 2.8470034  | 0.5392040  | 6.5279514  |
| C | 2.9299250  | 1.1617941  | 4.1922213  |
| C | 1.4411855  | -0.5952877 | 4.9115438  |
| C | 1.8786685  | -0.4197232 | 6.2231878  |
| C | 3.3692320  | 1.3315349  | 5.5036659  |
| H | 3.3090735  | 1.8172984  | 3.4080546  |
| H | 0.6822581  | -1.3443839 | 4.7025530  |
| H | 1.4557245  | -1.0413467 | 7.0139365  |
| H | 4.1097276  | 2.1011961  | 5.7276843  |
| H | 3.1840389  | 0.6750091  | 7.5566230  |
| O | -1.9713787 | -0.7658290 | -0.0364094 |
| C | -2.3393296 | 0.5005064  | 0.0879314  |
| H | -2.7691024 | 0.9889486  | -0.8062828 |
| H | -2.8103499 | 0.7961338  | 1.0455015  |
| H | -1.1873276 | 1.5035461  | 0.2475904  |

**Cpd. TS:  $\beta$ -elim. Ir(SMe):** Xmol xyz coordinates (Å) and total energy in Hartree of DFT PBE-D3BJ/def2-TZVP optimized geometry (gas phase); Ir: def2-ECP (60e); selected hydrogen atoms with H-H interatomic distances in Å are shown.

99

Energy = -2371.968479204  $\nu(\text{imag}) = -639.28 \text{ cm}^{-1}$

|    |            |            |            |
|----|------------|------------|------------|
| H  | 4.4694370  | -0.0740011 | -2.0812796 |
| C  | 3.9233353  | -0.1261925 | -1.1409769 |
| C  | 2.5175312  | -0.1521792 | 1.2896848  |
| C  | 2.5310177  | -0.0159603 | -1.1534240 |
| C  | 4.6027579  | -0.2958030 | 0.0687756  |
| C  | 3.9027904  | -0.3136330 | 1.2803361  |
| N  | 1.8499026  | -0.0438970 | 0.0664174  |
| H  | 5.6868508  | -0.4057737 | 0.0690654  |
| H  | 4.4283454  | -0.4506212 | 2.2241785  |
| C  | 1.6508053  | 0.1995960  | -2.2609594 |
| C  | 1.6188862  | -0.0967543 | 2.4042454  |
| N  | 0.3101987  | -0.0732998 | 2.0495102  |
| N  | 0.3510909  | 0.3783607  | -1.9156295 |
| Ir | -0.0480543 | 0.1281834  | 0.0600645  |
| C  | -0.6357995 | 0.7586527  | -2.8861307 |
| C  | -2.6157829 | 1.5538242  | -4.6891618 |
| C  | -1.2182836 | -0.2045463 | -3.7406652 |
| C  | -1.0349115 | 2.1191624  | -2.9264631 |
| C  | -2.0255260 | 2.4888035  | -3.8426807 |
| C  | -2.2115422 | 0.2247646  | -4.6304891 |
| H  | -2.3362797 | 3.5340759  | -3.8953278 |
| H  | -2.6730333 | -0.5068347 | -5.2960832 |
| H  | -3.3900030 | 1.8623714  | -5.3936323 |
| C  | -0.7208010 | -0.0974485 | 3.0422011  |
| C  | -2.7474422 | -0.1700154 | 4.9474986  |
| C  | -1.3193966 | -1.3431507 | 3.3570300  |
| C  | -1.1354740 | 1.1056378  | 3.6493468  |
| C  | -2.1581772 | 1.0421057  | 4.6040649  |
| C  | -2.3306145 | -1.3453507 | 4.3241285  |
| H  | -2.4890240 | 1.9612742  | 5.0915592  |
| H  | -2.8073529 | -2.2889263 | 4.5910493  |
| H  | -3.5401022 | -0.2012079 | 5.6970423  |
| C  | -0.7941018 | -1.6639860 | -3.7710240 |
| H  | -0.0464865 | -1.8149078 | -2.9783171 |
| C  | -1.9706539 | -2.6109592 | -3.4907756 |
| H  | -1.6154165 | -3.6517833 | -3.4556335 |
| H  | -2.7275480 | -2.5469801 | -4.2872355 |
| H  | -2.4471939 | -2.3678368 | -2.5330795 |
| C  | -0.1548876 | -2.0203735 | -5.1246698 |
| H  | 0.2362542  | -3.0484547 | -5.1007202 |
| H  | 0.6678468  | -1.3452570 | -5.3870029 |
| H  | -0.9040367 | -1.9686176 | -5.9294198 |
| C  | -0.8748677 | -2.6470200 | 2.7041126  |
| H  | -0.4934085 | -2.3833766 | 1.7081053  |
| C  | -2.0364802 | -3.6258936 | 2.5005114  |
| H  | -1.7057456 | -4.4658244 | 1.8723593  |
| H  | -2.8794428 | -3.1340774 | 1.9978636  |
| H  | -2.3896054 | -4.0528089 | 3.4519299  |
| C  | 0.2655934  | -3.3427955 | 3.4676148  |
| H  | 0.4915647  | -4.3101014 | 2.9943953  |
| H  | -0.0150529 | -3.5399083 | 4.5143741  |
| H  | 1.1900897  | -2.7509423 | 3.4637705  |
| C  | -0.4987117 | 2.4456541  | 3.3193835  |
| H  | 0.2907209  | 2.2687803  | 2.5746115  |
| C  | -1.5164557 | 3.4097107  | 2.6926987  |
| H  | -1.0302332 | 4.3577973  | 2.4184373  |
| H  | -2.3304479 | 3.6401187  | 3.3961762  |
| H  | -1.9668707 | 2.9852774  | 1.7853920  |
| C  | 0.1503037  | 3.0796935  | 4.5593727  |
| H  | 0.8785245  | 2.4027360  | 5.0240546  |
| H  | -0.6078911 | 3.3333147  | 5.3154190  |
| H  | 0.6709529  | 4.0090754  | 4.2841106  |
| C  | -0.4071739 | 3.1960738  | -2.0478834 |
| H  | 0.2581604  | 2.6982707  | -1.3285877 |
| C  | -1.4652860 | 3.9639265  | -1.2420209 |
| H  | -2.1242670 | 4.5508313  | -1.8989267 |
| H  | -0.9799165 | 4.6635976  | -0.5459978 |
| H  | -2.0997595 | 3.2874975  | -0.6541483 |
| C  | 0.4392626  | 4.1870504  | -2.8643127 |
| H  | -0.1634364 | 4.6774930  | -3.6437126 |
| H  | 1.2920272  | 3.6970896  | -3.3527606 |
| H  | 0.8412989  | 4.9718567  | -2.2061705 |

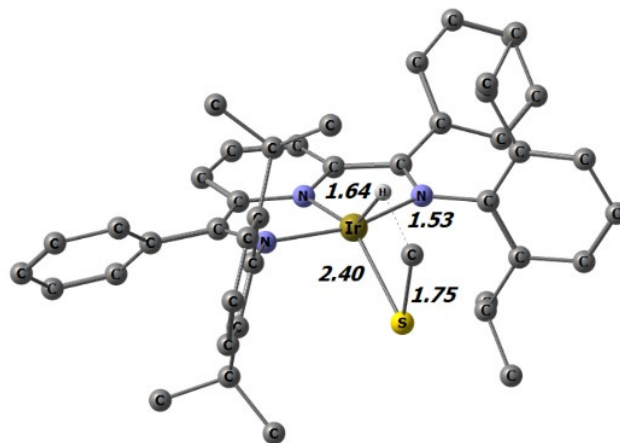

|   |            |            |            |
|---|------------|------------|------------|
| C | 2.1554706  | 0.1646132  | -3.6487746 |
| C | 3.1708417  | -0.0204933 | -6.2785672 |
| C | 3.0041557  | -0.8947152 | -4.0297941 |
| C | 1.8169148  | 1.1198898  | -4.6233934 |
| C | 2.3192440  | 1.0266857  | -5.9201962 |
| C | 3.5092339  | -0.9831611 | -5.3254025 |
| H | 3.2355124  | -1.6763670 | -3.3058111 |
| H | 1.1472415  | 1.9373051  | -4.3706629 |
| H | 2.0391491  | 1.7813683  | -6.6567980 |
| H | 4.1538839  | -1.8210057 | -5.5959322 |
| H | 3.5584056  | -0.0920950 | -7.2958008 |
| C | 2.1160475  | 0.1290429  | 3.7801532  |
| C | 3.1083409  | 0.7599866  | 6.3563747  |
| C | 3.1593953  | 1.0636910  | 3.9577066  |
| C | 1.5720760  | -0.4650410 | 4.9347476  |
| C | 2.0638842  | -0.1529636 | 6.2012442  |
| C | 3.6517924  | 1.3701220  | 5.2242942  |
| H | 3.5583904  | 1.5852998  | 3.0880064  |
| H | 0.7529555  | -1.1722148 | 4.8511087  |
| H | 1.6201767  | -0.6313675 | 7.0758236  |
| H | 4.4510953  | 2.1060714  | 5.3262224  |
| H | 3.4868354  | 1.0028905  | 7.3503088  |
| S | -2.0541458 | -1.1741697 | -0.1554247 |
| C | -2.2542464 | 0.5488480  | 0.0784401  |
| H | -2.6561774 | 1.0951163  | -0.7818102 |
| H | -2.6908082 | 0.8452799  | 1.0389693  |
| H | -1.0181519 | 1.4354055  | 0.2415244  |

**Cpd. Ir(S)(H):** Xmol xyz coordinates (Å) and total energy in Hartree of DFT PBE-D3BJ/def2-TZVP optimized geometry (gas phase); Ir: def2-ECP (60e); selected hydrogen atoms with H-H interatomic distances in Å are shown.

96

Energy = -2332.69311339

|    |            |            |            |
|----|------------|------------|------------|
| H  | 3.8821390  | 1.4410342  | -2.4034361 |
| C  | 3.4109569  | 1.2719445  | -1.4364192 |
| C  | 2.1373370  | 0.9431309  | 1.0426743  |
| C  | 2.1155170  | 0.7536624  | -1.3757388 |
| C  | 4.0827441  | 1.5772415  | -0.2458062 |
| C  | 3.4561856  | 1.4117964  | 0.9922566  |
| N  | 1.5195543  | 0.5994293  | -0.1425037 |
| H  | 5.1007351  | 1.9642113  | -0.2857570 |
| H  | 3.9801686  | 1.6509015  | 1.9160029  |
| C  | 1.2234010  | 0.3990680  | -2.4632013 |
| C  | 1.2846372  | 0.7256641  | 2.1896699  |
| N  | 0.0643251  | 0.2153197  | 1.9157451  |
| N  | -0.0374410 | 0.1214999  | -2.0932555 |
| Ir | -0.3356045 | -0.0022894 | -0.0685615 |
| S  | -2.5531490 | -0.1066233 | 0.0044121  |
| C  | -1.0407272 | -0.1824441 | -3.0734893 |
| C  | -2.9885130 | -0.7293188 | -4.9769693 |
| C  | -1.1138797 | -1.4771512 | -3.6202065 |
| C  | -1.9597967 | 0.8328105  | -3.4182606 |
| C  | -2.9177953 | 0.5331193  | -4.3926681 |
| C  | -2.1032006 | -1.7266710 | -4.5779940 |
| H  | -3.6305873 | 1.3039626  | -4.6900681 |
| H  | -2.1790404 | -2.7230541 | -5.0171847 |
| H  | -3.7479890 | -0.9412547 | -5.7312996 |
| C  | -0.8666783 | -0.0440093 | 2.9796262  |
| C  | -2.6366933 | -0.5316794 | 5.0723550  |
| C  | -1.1702310 | -1.3834218 | 3.3229749  |
| C  | -1.4973882 | 1.0466569  | 3.6145223  |
| C  | -2.3781654 | 0.7720984  | 4.6672042  |
| C  | -2.0490599 | -1.5949346 | 4.3901538  |
| H  | -2.8760425 | 1.6021512  | 5.1707122  |
| H  | -2.2920073 | -2.6156555 | 4.6841196  |
| H  | -3.3202844 | -0.7244799 | 5.9007627  |
| C  | -0.1987268 | -2.5992468 | -3.1634659 |
| H  | 0.5790615  | -2.1629502 | -2.5195012 |
| C  | -0.9874033 | -3.6058109 | -2.3089833 |
| H  | -0.3172853 | -4.3812442 | -1.9072497 |
| H  | -1.7623278 | -4.1045657 | -2.9101970 |
| H  | -1.4861321 | -3.1007261 | -1.4700628 |
| C  | 0.5104273  | -3.2900063 | -4.3353509 |
| H  | 1.2135837  | -4.0493357 | -3.9618074 |
| H  | 1.0742812  | -2.5683101 | -4.9427407 |
| H  | -0.2070808 | -3.8016159 | -4.9940502 |
| C  | -0.5873113 | -2.5605125 | 2.5554889  |
| H  | -0.6144172 | -2.2653808 | 1.4958351  |
| C  | -1.4193045 | -3.8398354 | 2.6741717  |
| H  | -1.0358455 | -4.5930863 | 1.9707754  |
| H  | -2.4749314 | -3.6546498 | 2.4320815  |
| H  | -1.3664895 | -4.2804308 | 3.6819289  |
| C  | 0.8801972  | -2.8464537 | 2.9104521  |
| H  | 1.2543372  | -3.6949133 | 2.3178243  |
| H  | 0.9834496  | -3.1103862 | 3.9747194  |
| H  | 1.5318112  | -1.9871840 | 2.7036048  |
| C  | -1.3240267 | 2.4836825  | 3.1513372  |
| H  | -0.4758858 | 2.5225662  | 2.4528845  |
| C  | -2.5731298 | 2.9359994  | 2.3762253  |
| H  | -2.4294394 | 3.9504993  | 1.9733206  |
| H  | -3.4530359 | 2.9538084  | 3.0372103  |
| H  | -2.7874880 | 2.2465483  | 1.5469604  |
| C  | -1.0160199 | 3.4428595  | 4.3085358  |
| H  | -0.1533244 | 3.1039279  | 4.8976821  |
| H  | -1.8754576 | 3.5406918  | 4.9882098  |
| H  | -0.7940384 | 4.4470944  | 3.9183892  |
| C  | -1.9270587 | 2.2192607  | -2.7889400 |
| H  | -1.2487911 | 2.1722506  | -1.9242780 |
| C  | -3.3053855 | 2.6260383  | -2.2527331 |

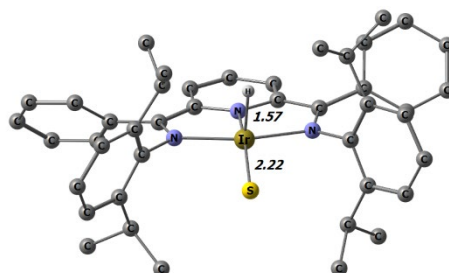

|   |            |            |            |
|---|------------|------------|------------|
| H | -4.0328568 | 2.7676703  | -3.0661962 |
| H | -3.2316201 | 3.5773288  | -1.7049195 |
| H | -3.6881564 | 1.8553395  | -1.5693973 |
| C | -1.3852865 | 3.2862105  | -3.7543682 |
| H | -1.9854014 | 3.3264595  | -4.6759950 |
| H | -0.3400869 | 3.0982784  | -4.0379136 |
| H | -1.4260270 | 4.2794970  | -3.2827936 |
| C | 1.7446949  | 0.2495709  | -3.8392434 |
| C | 2.8092807  | -0.1965396 | -6.4136112 |
| C | 2.9512605  | -0.4577359 | -4.0145937 |
| C | 1.0802238  | 0.7209235  | -4.9848626 |
| C | 1.6105561  | 0.5016559  | -6.2547721 |
| C | 3.4767844  | -0.6784506 | -5.2861534 |
| H | 3.4601889  | -0.8690309 | -3.1423710 |
| H | 0.1389986  | 1.2541992  | -4.8860648 |
| H | 1.0758528  | 0.8781525  | -7.1280502 |
| H | 4.4043380  | -1.2424797 | -5.3950094 |
| H | 3.2165715  | -0.3710757 | -7.4104856 |
| C | 1.7391181  | 1.1108654  | 3.5438480  |
| C | 2.6358192  | 1.9415288  | 6.0849817  |
| C | 2.3030640  | 2.3870479  | 3.7327095  |
| C | 1.6223716  | 0.2640506  | 4.6601163  |
| C | 2.0678967  | 0.6767679  | 5.9136468  |
| C | 2.7488750  | 2.7971235  | 4.9882410  |
| H | 2.3559117  | 3.0775524  | 2.8900269  |
| H | 1.1773148  | -0.7217360 | 4.5480632  |
| H | 1.9679337  | 0.0018630  | 6.7649735  |
| H | 3.1695990  | 3.7963406  | 5.1108706  |
| H | 2.9792774  | 2.2613338  | 7.0697709  |
| H | 0.0745718  | -1.5151221 | -0.1843036 |

**Cpd. Ir(O)(H):** Xmol xyz coordinates (Å) and total energy in Hartree of DFT PBE-D3BJ/def2-TZVP optimized geometry (gas phase); Ir: def2-ECP (60e); selected hydrogen atoms with H-H interatomic distances in Å are shown.

96

Energy = -2009.792449373

|    |            |            |            |
|----|------------|------------|------------|
| H  | 3.7159548  | 1.6048233  | -2.3798446 |
| C  | 3.2604313  | 1.3748676  | -1.4181766 |
| C  | 1.9982041  | 0.9616602  | 1.0541141  |
| C  | 1.9516468  | 0.8788673  | -1.3729986 |
| C  | 3.9548107  | 1.5917132  | -0.2226079 |
| C  | 3.3355514  | 1.3905819  | 1.0114645  |
| N  | 1.3582175  | 0.6728853  | -0.1386972 |
| H  | 4.9807549  | 1.9584525  | -0.2552149 |
| H  | 3.8678030  | 1.5859407  | 1.9399191  |
| C  | 1.0553289  | 0.5776925  | -2.4646663 |
| C  | 1.1377390  | 0.7678380  | 2.1935408  |
| N  | -0.1301041 | 0.3995035  | 1.9024594  |
| N  | -0.2324632 | 0.3912812  | -2.1067790 |
| Ir | -0.5579991 | 0.3604878  | -0.0800690 |
| O  | -2.2678305 | 0.9685518  | -0.0048915 |
| C  | -1.2082681 | -0.1018073 | -3.0338508 |
| C  | -3.1483366 | -1.0344682 | -4.8020360 |
| C  | -1.1709373 | -1.4526413 | -3.4469512 |
| C  | -2.2336213 | 0.7765623  | -3.4547354 |
| C  | -3.1824998 | 0.2842061  | -4.3565943 |
| C  | -2.1582814 | -1.8936554 | -4.3349611 |
| H  | -3.9706627 | 0.9513587  | -4.7104655 |
| H  | -2.1480157 | -2.9335582 | -4.6671999 |
| H  | -3.9021582 | -1.3962769 | -5.5032982 |
| C  | -1.0773114 | 0.1157060  | 2.9415650  |
| C  | -2.9062956 | -0.3899261 | 4.9813436  |
| C  | -1.4764912 | -1.2210380 | 3.1906675  |
| C  | -1.6383748 | 1.2015744  | 3.6489284  |
| C  | -2.5495148 | 0.9169108  | 4.6729721  |
| C  | -2.3842073 | -1.4424360 | 4.2318144  |
| H  | -2.9901593 | 1.7431634  | 5.2327288  |
| H  | -2.6992555 | -2.4613145 | 4.4548214  |
| H  | -3.6122601 | -0.5915334 | 5.7886107  |
| C  | -0.1449258 | -2.4451729 | -2.9274957 |
| H  | 0.5974689  | -1.8949356 | -2.3316126 |
| C  | -0.8137046 | -3.4681110 | -1.9937992 |
| H  | -0.0621157 | -4.1432754 | -1.5574382 |
| H  | -1.5433798 | -4.0811046 | -2.5436733 |
| H  | -1.3490216 | -2.9694030 | -1.1732518 |
| C  | 0.6059033  | -3.1506607 | -4.0652545 |
| H  | 1.3965156  | -3.7980226 | -3.6573994 |
| H  | 1.0721983  | -2.4261875 | -4.7464013 |
| H  | -0.0699142 | -3.7865149 | -4.6560368 |
| C  | -0.9736322 | -2.3831357 | 2.3454004  |
| H  | -1.0135377 | -2.0319540 | 1.3018386  |
| C  | -1.8593778 | -3.6294802 | 2.4207106  |
| H  | -1.5274799 | -4.3599106 | 1.6688928  |
| H  | -2.9131730 | -3.3907501 | 2.2202774  |
| H  | -1.7981966 | -4.1229983 | 3.4028964  |
| C  | 0.4883367  | -2.7599768 | 2.6314160  |
| H  | 0.7992395  | -3.5874233 | 1.9759240  |
| H  | 0.6093633  | -3.0953688 | 3.6733872  |
| H  | 1.1765156  | -1.9232674 | 2.4555849  |
| C  | -1.3473599 | 2.6497575  | 3.2947825  |
| H  | -0.4682077 | 2.6742713  | 2.6361564  |
| C  | -2.5260374 | 3.2358768  | 2.4988585  |
| H  | -2.3028528 | 4.2697184  | 2.1931519  |
| H  | -3.4373071 | 3.2540844  | 3.1164404  |
| H  | -2.7247180 | 2.6310964  | 1.6022433  |
| C  | -1.0213540 | 3.5041183  | 4.5262207  |
| H  | -0.2079878 | 3.0650369  | 5.1201713  |
| H  | -1.8977908 | 3.6217720  | 5.1806480  |
| H  | -0.7128054 | 4.5125972  | 4.2134752  |
| C  | -2.3271342 | 2.2224952  | -2.9897167 |
| H  | -1.5727375 | 2.3705400  | -2.2049055 |
| C  | -3.6968951 | 2.5158130  | -2.3607310 |

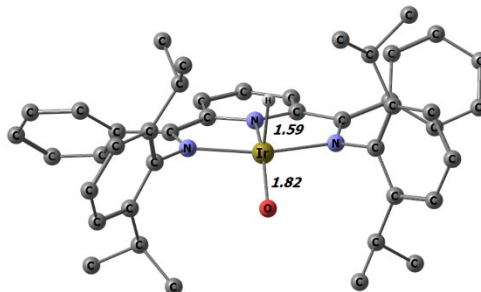

|   |            |            |            |
|---|------------|------------|------------|
| H | -4.5080037 | 2.4280191  | -3.1000549 |
| H | -3.7147319 | 3.5434124  | -1.9676854 |
| H | -3.8818750 | 1.8275450  | -1.5276438 |
| C | -2.0391370 | 3.2140497  | -4.1293040 |
| H | -2.7419424 | 3.0741343  | -4.9650493 |
| H | -1.0190656 | 3.1138185  | -4.5266914 |
| H | -2.1515758 | 4.2465661  | -3.7668979 |
| C | 1.5743351  | 0.3949750  | -3.8331019 |
| C | 2.6164052  | -0.0374517 | -6.4203391 |
| C | 2.7947817  | -0.2847547 | -4.0211476 |
| C | 0.8874500  | 0.8476281  | -4.9737118 |
| C | 1.4034034  | 0.6336849  | -6.2496339 |
| C | 3.3093027  | -0.4970845 | -5.2981458 |
| H | 3.3248405  | -0.6793362 | -3.1539869 |
| H | -0.0605226 | 1.3668299  | -4.8609338 |
| H | 0.8506370  | 0.9964609  | -7.1175457 |
| H | 4.2490060  | -1.0387697 | -5.4167081 |
| H | 3.0163042  | -0.2058516 | -7.4212357 |
| C | 1.6172551  | 1.0261479  | 3.5688653  |
| C | 2.5261686  | 1.6357105  | 6.1679058  |
| C | 2.2622741  | 2.2471359  | 3.8437346  |
| C | 1.4275795  | 0.1218261  | 4.6280480  |
| C | 1.8792663  | 0.4250701  | 5.9107895  |
| C | 2.7132363  | 2.5476643  | 5.1277955  |
| H | 2.3740091  | 2.9839249  | 3.0472095  |
| H | 0.9197556  | -0.8227764 | 4.4493200  |
| H | 1.7208576  | -0.2931922 | 6.7166427  |
| H | 3.1969486  | 3.5070185  | 5.3179295  |
| H | 2.8740552  | 1.8707575  | 7.1747816  |
| H | -0.3105132 | -1.2022022 | -0.2023629 |

**Cpd. 7:** Xmol xyz coordinates (Å) and total energy in Hartree of DFT PBE-D3BJ/def2-TZVP optimized geometry (gas phase); Ir: def2-ECP (60e; the hydroxide hydrogen atom is shown).

96

Energy = -2009.856563819

|    |            |            |            |
|----|------------|------------|------------|
| H  | 4.2520168  | 0.1497748  | -2.2272877 |
| C  | 3.6971119  | 0.0526965  | -1.2952544 |
| C  | 2.2535188  | -0.1272589 | 1.0992540  |
| C  | 2.2999560  | 0.0625368  | -1.3220416 |
| C  | 4.3658710  | -0.0807338 | -0.0744313 |
| C  | 3.6489433  | -0.1839349 | 1.1224854  |
| N  | 1.6017516  | -0.0131707 | -0.1219288 |
| H  | 5.4552218  | -0.1058023 | -0.0553938 |
| H  | 4.1648869  | -0.3084245 | 2.0734579  |
| C  | 1.4028687  | 0.1772478  | -2.4457490 |
| C  | 1.3130023  | -0.2053721 | 2.1914338  |
| N  | 0.0187336  | -0.2043102 | 1.8175852  |
| N  | 0.0992025  | 0.2397391  | -2.1046019 |
| Ir | -0.2897450 | 0.0225019  | -0.1574611 |
| O  | -2.2534368 | 0.0283096  | -0.1392591 |
| H  | -2.6142249 | 0.1013584  | -1.0440375 |
| C  | -0.9445801 | 0.3192765  | -3.0829262 |
| C  | -3.0750005 | 0.4502700  | -4.8727279 |
| C  | -1.3112361 | -0.8412448 | -3.8003374 |
| C  | -1.6543965 | 1.5345463  | -3.2189354 |
| C  | -2.7152538 | 1.5730247  | -4.1319839 |
| C  | -2.3822925 | -0.7452162 | -4.6953286 |
| H  | -3.2694767 | 2.5046848  | -4.2614649 |
| H  | -2.6832744 | -1.6297180 | -5.2592042 |
| H  | -3.9049979 | 0.5025791  | -5.5791664 |
| C  | -1.0300002 | -0.2387637 | 2.7962171  |
| C  | -3.0995591 | -0.3026335 | 4.6544691  |
| C  | -1.7885366 | -1.4197998 | 2.9354951  |
| C  | -1.3223592 | 0.9274617  | 3.5357971  |
| C  | -2.3657649 | 0.8660869  | 4.4653072  |
| C  | -2.8152586 | -1.4281272 | 3.8860805  |
| H  | -2.6114898 | 1.7551274  | 5.0481971  |
| H  | -3.4067643 | -2.3359869 | 4.0199104  |
| H  | -3.9046336 | -0.3302863 | 5.3907191  |
| C  | -0.6326580 | -2.1800348 | -3.5668287 |
| H  | 0.2905449  | -1.9997909 | -2.9999727 |
| C  | -1.5271674 | -3.0740893 | -2.6922912 |
| H  | -1.0288345 | -4.0332652 | -2.4857187 |
| H  | -2.4822265 | -3.2867120 | -3.1963635 |
| H  | -1.7463326 | -2.5868270 | -1.7317093 |
| C  | -0.2394884 | -2.8770309 | -4.8747207 |
| H  | 0.3216291  | -3.7978982 | -4.6577325 |
| H  | 0.3930121  | -2.2284037 | -5.4966959 |
| H  | -1.1220456 | -3.1633367 | -5.4656929 |
| C  | -1.5359385 | -2.6574006 | 2.0878640  |
| H  | -0.7109824 | -2.4267958 | 1.3963164  |
| C  | -2.7679641 | -2.9844137 | 1.2308244  |
| H  | -2.5550950 | -3.8360384 | 0.5668415  |
| H  | -3.0432714 | -2.1149753 | 0.6190241  |
| H  | -3.6288096 | -3.2566560 | 1.8604878  |
| C  | -1.1235172 | -3.8721865 | 2.9326775  |
| H  | -0.9518281 | -4.7441954 | 2.2842253  |
| H  | -1.9089991 | -4.1421844 | 3.6544827  |
| H  | -0.1978593 | -3.6902287 | 3.4974746  |
| C  | -0.6043089 | 2.2417605  | 3.2809445  |
| H  | 0.3233733  | 2.0244449  | 2.7340635  |
| C  | -1.4650364 | 3.1285154  | 2.3656723  |
| H  | -0.9371620 | 4.0641669  | 2.1254647  |
| H  | -2.4161699 | 3.3865224  | 2.8557814  |
| H  | -1.6959073 | 2.6067355  | 1.4268991  |
| C  | -0.2129834 | 2.9714041  | 4.5707286  |
| H  | 0.3874667  | 2.3261999  | 5.2272149  |
| H  | -1.0958858 | 3.3068475  | 5.1346417  |
| H  | 0.3802251  | 3.8667044  | 4.3324298  |
| C  | -1.2999676 | 2.7810457  | -2.4200679 |
| H  | -0.4626109 | 2.5236394  | -1.7538405 |
| C  | -2.4709995 | 3.2217518  | -1.5288694 |
| H  | -3.3520308 | 3.4901897  | -2.1313176 |
| H  | -2.1864180 | 4.1053933  | -0.9385798 |
| H  | -2.7572502 | 2.4233964  | -0.8308703 |
| C  | -0.8530427 | 3.9382430  | -3.3270128 |
| H  | -1.6562297 | 4.2383702  | -4.0165845 |

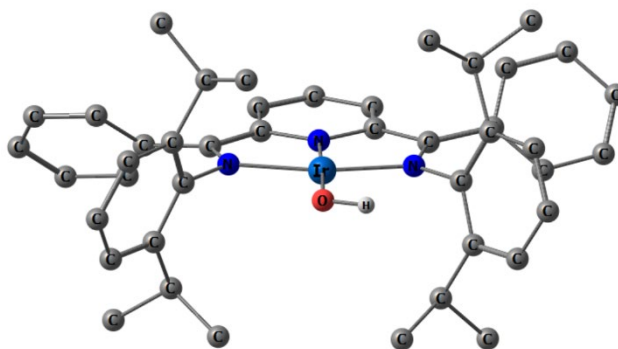



|   |            |            |            |
|---|------------|------------|------------|
| H | 0.0266742  | 3.6760554  | -3.9316084 |
| H | -0.5895929 | 4.8156382  | -2.7182286 |
| C | 1.8853080  | 0.1434621  | -3.8386125 |
| C | 2.7947694  | -0.0287498 | -6.5009827 |
| C | 2.8018540  | -0.8527435 | -4.2267342 |
| C | 1.4340262  | 1.0495622  | -4.8135859 |
| C | 1.8847703  | 0.9636196  | -6.1291190 |
| C | 3.2511776  | -0.9371425 | -5.5433838 |
| H | 3.1346968  | -1.5868767 | -3.4920021 |
| H | 0.7238314  | 1.8257765  | -4.5372476 |
| H | 1.5217018  | 1.6791269  | -6.8684857 |
| H | 3.9509199  | -1.7257270 | -5.8247490 |
| H | 3.1432119  | -0.0963980 | -7.5325945 |
| C | 1.7660884  | -0.2131959 | 3.5966905  |
| C | 2.6390660  | -0.1328800 | 6.2737663  |
| C | 2.6965081  | 0.7526024  | 4.0240004  |
| C | 1.2823032  | -1.1372019 | 4.5380777  |
| C | 1.7160701  | -1.0970027 | 5.8613657  |
| C | 3.1273442  | 0.7926750  | 5.3492344  |
| H | 3.0568230  | 1.4977226  | 3.3134293  |
| H | 0.5578781  | -1.8880159 | 4.2301676  |
| H | 1.3275652  | -1.8246533 | 6.5754796  |
| H | 3.8381540  | 1.5590090  | 5.6625204  |
| H | 2.9729291  | -0.1005133 | 7.3119455  |

**Cpd. 9:** Xmol xyz coordinates (Å) and total energy in Hartree of DFT PBE-D3BJ/def2-TZVP optimized geometry (gas phase); Ir: def2-ECP (60e).

99

Energy = -2049.111283853

|    |            |            |            |
|----|------------|------------|------------|
| H  | 4.3038119  | 0.1411566  | -2.1626804 |
| C  | 3.7663151  | 0.0445932  | -1.2204520 |
| C  | 2.3609884  | -0.1300512 | 1.1918709  |
| C  | 2.3679517  | 0.0117420  | -1.2283573 |
| C  | 4.4561333  | -0.0384132 | -0.0087911 |
| C  | 3.7563925  | -0.1353337 | 1.1996844  |
| N  | 1.6852459  | -0.0678249 | -0.0212710 |
| H  | 5.5458236  | -0.0247765 | -0.0040549 |
| H  | 4.2850779  | -0.2142429 | 2.1485702  |
| C  | 1.4552769  | 0.1153889  | -2.3339378 |
| C  | 1.4502628  | -0.2145947 | 2.3074971  |
| N  | 0.1514198  | -0.2758357 | 1.9691366  |
| N  | 0.1534987  | 0.1670480  | -1.9696301 |
| Ir | -0.2110692 | -0.0725121 | -0.0051485 |
| O  | -2.1425993 | -0.1059759 | 0.2857301  |
| C  | -3.2024919 | -0.0303614 | -0.6363916 |
| H  | -2.9495544 | -0.4220224 | -1.6355003 |
| H  | -4.0616264 | -0.5997203 | -0.2387658 |
| H  | -3.5301076 | 1.0189413  | -0.7608562 |
| C  | -0.8624783 | 0.3441392  | -2.9588943 |
| C  | -2.8857250 | 0.7069514  | -4.8287145 |
| C  | -1.2380974 | -0.7408385 | -3.7769314 |
| C  | -1.5184331 | 1.5977075  | -3.0222615 |
| C  | -2.5214178 | 1.7550325  | -3.9829360 |
| C  | -2.2600940 | -0.5303652 | -4.7108062 |
| H  | -3.0407875 | 2.7102619  | -4.0620890 |
| H  | -2.5706265 | -1.3540044 | -5.3557777 |
| H  | -3.6739436 | 0.8528202  | -5.5692508 |
| C  | -0.8708218 | -0.3383831 | 2.9753888  |
| C  | -2.9289806 | -0.4426174 | 4.8428100  |
| C  | -1.5079751 | -1.5719040 | 3.2223729  |
| C  | -1.2695965 | 0.8499420  | 3.6199491  |
| C  | -2.3037005 | 0.7688642  | 4.5588779  |
| C  | -2.5351214 | -1.5977635 | 4.1719528  |
| H  | -2.6294476 | 1.6760140  | 5.0707347  |
| H  | -3.0389609 | -2.5424544 | 4.3854976  |
| H  | -3.7322696 | -0.4844760 | 5.5803877  |
| C  | -0.6221145 | -2.1196719 | -3.6115937 |
| H  | 0.3004195  | -2.0107281 | -3.0257751 |
| C  | -1.5623374 | -3.0243253 | -2.7977302 |
| H  | -1.1143463 | -4.0200479 | -2.6608508 |
| H  | -2.5276656 | -3.1513557 | -3.3109151 |
| H  | -1.7545366 | -2.5980806 | -1.8028377 |
| C  | -0.2415592 | -2.7605918 | -4.9511575 |
| H  | 0.2876528  | -3.7092853 | -4.7786234 |
| H  | 0.4170402  | -2.1019393 | -5.5340973 |
| H  | -1.1280358 | -2.9873804 | -5.5618008 |
| C  | -1.1307128 | -2.8425596 | 2.4753058  |
| H  | -0.2383883 | -2.6221271 | 1.8700423  |
| C  | -2.2516710 | -3.2463265 | 1.5044250  |
| H  | -1.9512995 | -4.1252871 | 0.9141560  |
| H  | -2.4775859 | -2.4188415 | 0.8207867  |
| H  | -3.1701272 | -3.5032415 | 2.0542036  |
| C  | -0.7928197 | -4.0087126 | 3.4155428  |
| H  | -0.4870940 | -4.8887133 | 2.8306134  |
| H  | -1.6628029 | -4.3013147 | 4.0219559  |
| H  | 0.0267574  | -3.7649918 | 4.1068512  |
| C  | -0.6662016 | 2.1975272  | 3.2632902  |
| H  | 0.2501015  | 2.0169374  | 2.6841763  |
| C  | -1.6295482 | 2.9723479  | 2.3481048  |
| H  | -1.1768696 | 3.9228592  | 2.0263614  |
| H  | -2.5684683 | 3.2010205  | 2.8751445  |
| H  | -1.8736950 | 2.3781376  | 1.4565924  |
| C  | -0.2754245 | 3.0188703  | 4.4976442  |
| H  | 0.4098880  | 2.4575465  | 5.1481997  |
| H  | -1.1552915 | 3.3030849  | 5.0936182  |
| H  | 0.2256153  | 3.9489590  | 4.1904002  |
| C  | -1.1688934 | 2.7125412  | -2.0473144 |
| H  | -0.9749435 | 2.2176154  | -1.0761044 |
| C  | -2.3049719 | 3.7157352  | -1.8352547 |
| H  | -2.4681773 | 4.3494183  | -2.7209030 |
| H  | -2.0559748 | 4.3834815  | -0.9981033 |
| H  | -3.2525789 | 3.2130975  | -1.5954071 |

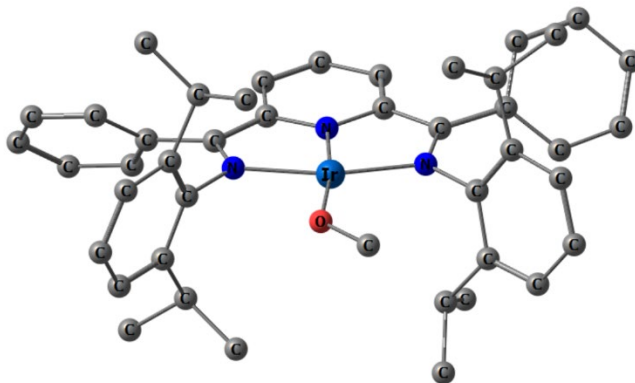

|   |           |            |            |
|---|-----------|------------|------------|
| C | 0.1229801 | 3.4535395  | -2.4278325 |
| H | 0.0268589 | 3.9290187  | -3.4167080 |
| H | 0.9920552 | 2.7833115  | -2.4488419 |
| H | 0.3331233 | 4.2446622  | -1.6927358 |
| C | 1.9307664 | 0.0822024  | -3.7323824 |
| C | 2.8672435 | -0.1233418 | -6.3869023 |
| C | 2.8506436 | -0.9187339 | -4.1036362 |
| C | 1.4876414 | 0.9752545  | -4.7244901 |
| C | 1.9530690 | 0.8719146  | -6.0341016 |
| C | 3.3134953 | -1.0202215 | -5.4141922 |
| H | 3.1762266 | -1.6442122 | -3.3571573 |
| H | 0.7728606 | 1.7548622  | -4.4720287 |
| H | 1.5954716 | 1.5777253  | -6.7854138 |
| H | 4.0151744 | -1.8131222 | -5.6782075 |
| H | 3.2248751 | -0.2030181 | -7.4145330 |
| C | 1.9351489 | -0.1481611 | 3.7009980  |
| C | 2.8522642 | 0.0865397  | 6.3523433  |
| C | 2.7883446 | 0.9054713  | 4.0776264  |
| C | 1.5542216 | -1.0830401 | 4.6768452  |
| C | 2.0095271 | -0.9663483 | 5.9885401  |
| C | 3.2403589 | 1.0223524  | 5.3912819  |
| H | 3.0710324 | 1.6537515  | 3.3358520  |
| H | 0.8956407 | -1.9045376 | 4.4038233  |
| H | 1.7015476 | -1.7037011 | 6.7314416  |
| H | 3.8892072 | 1.8553353  | 5.6666539  |
| H | 3.2029243 | 0.1788431  | 7.3813489  |

**Cpd. 14:** Xmol xyz coordinates (Å) and total energy in Hartree of DFT PBE-D3BJ/def2-TZVP optimized geometry (gas phase); Ir: def2-ECP (60e).

99

Energy = -2372.005820392

|    |            |            |            |
|----|------------|------------|------------|
| H  | 4.2774818  | 0.0876044  | -2.1405296 |
| C  | 3.7395215  | 0.0202455  | -1.1961798 |
| C  | 2.3296293  | -0.0819746 | 1.2172022  |
| C  | 2.3407269  | 0.0235512  | -1.1994380 |
| C  | 4.4268902  | -0.0670102 | 0.0165669  |
| C  | 3.7258643  | -0.1287928 | 1.2257408  |
| N  | 1.6621503  | -0.0181634 | 0.0064978  |
| H  | 5.5165865  | -0.0868269 | 0.0213784  |
| H  | 4.2538960  | -0.2163351 | 2.1737614  |
| C  | 1.4351544  | 0.1215059  | -2.3116274 |
| C  | 1.4141443  | -0.1487254 | 2.3302045  |
| N  | 0.1145399  | -0.1994865 | 1.9800342  |
| N  | 0.1311199  | 0.2075835  | -1.9605624 |
| Ir | -0.2688488 | 0.0114851  | 0.0063509  |
| S  | -2.4921548 | 0.0164858  | 0.3027409  |
| C  | -3.5745087 | 0.0893253  | -1.1637822 |
| H  | -3.2071387 | -0.5417532 | -1.9800277 |
| H  | -4.5665527 | -0.2563625 | -0.8452137 |
| H  | -3.6583589 | 1.1203889  | -1.5287030 |
| C  | -0.8568065 | 0.3823511  | -2.9789363 |
| C  | -2.7820577 | 0.7532595  | -4.9458741 |
| C  | -1.2448807 | -0.7191104 | -3.7683266 |
| C  | -1.4488132 | 1.6596711  | -3.1213524 |
| C  | -2.4026821 | 1.8200331  | -4.1311232 |
| C  | -2.2189097 | -0.5046661 | -4.7514397 |
| H  | -2.8720301 | 2.7940001  | -4.2725287 |
| H  | -2.5389316 | -1.3400483 | -5.3760207 |
| H  | -3.5314401 | 0.9020802  | -5.7251166 |
| C  | -0.8962483 | -0.3483778 | 2.9886834  |
| C  | -2.8595353 | -0.6702760 | 4.9288940  |
| C  | -1.5076245 | -1.6129597 | 3.1379855  |
| C  | -1.2903981 | 0.7688279  | 3.7510795  |
| C  | -2.2802239 | 0.5787895  | 4.7217606  |
| C  | -2.4812052 | -1.7493270 | 4.1334977  |
| H  | -2.6039950 | 1.4292680  | 5.3243195  |
| H  | -2.9586329 | -2.7197897 | 4.2801431  |
| H  | -3.6230696 | -0.7985752 | 5.6980742  |
| C  | -0.6845108 | -2.1114069 | -3.5288925 |
| H  | 0.2410653  | -2.0062859 | -2.9469766 |
| C  | -1.6568475 | -2.9375562 | -2.6700443 |
| H  | -1.2507257 | -3.9451725 | -2.4941920 |
| H  | -2.6307722 | -3.0455540 | -3.1716798 |
| H  | -1.8178583 | -2.4613252 | -1.6920618 |
| C  | -0.3256856 | -2.8360924 | -4.8310226 |
| H  | 0.1745888  | -3.7892043 | -4.6052973 |
| H  | 0.3521645  | -2.2310463 | -5.4491904 |
| H  | -1.2188060 | -3.0708222 | -5.4290317 |
| C  | -1.1358141 | -2.8041227 | 2.2651184  |
| H  | -0.5322497 | -2.4205782 | 1.4278720  |
| C  | -2.3770929 | -3.4649350 | 1.6522035  |
| H  | -2.0743134 | -4.2517943 | 0.9452988  |
| H  | -2.9774820 | -2.7219292 | 1.1095224  |
| H  | -3.0135533 | -3.9334093 | 2.4179367  |
| C  | -0.2890415 | -3.8381176 | 3.0236935  |
| H  | -0.0752415 | -4.7018669 | 2.3764383  |
| H  | -0.8176749 | -4.2082686 | 3.9157533  |
| H  | 0.6750336  | -3.4221418 | 3.3482542  |
| C  | -0.7204781 | 2.1555200  | 3.5066774  |
| H  | 0.1395692  | 2.0542650  | 2.8299206  |
| C  | -1.7574351 | 3.0350668  | 2.7885167  |
| H  | -1.3312030 | 4.0247234  | 2.5637835  |
| H  | -2.6478782 | 3.1824857  | 3.4184693  |
| H  | -2.0789451 | 2.5677568  | 1.8473610  |
| C  | -0.2241881 | 2.8187641  | 4.7979539  |
| H  | 0.5061026  | 2.1850958  | 5.3195161  |
| H  | -1.0545418 | 3.0228731  | 5.4902632  |
| H  | 0.2568690  | 3.7814683  | 4.5694609  |
| C  | -1.0856869 | 2.8013965  | -2.1820116 |
| H  | -0.9172464 | 2.3391355  | -1.1922139 |
| C  | -2.2048025 | 3.8334192  | -2.0196557 |
| H  | -2.3521130 | 4.4340773  | -2.9306272 |
| H  | -1.9482355 | 4.5296730  | -1.2084750 |
| H  | -3.1634871 | 3.3600700  | -1.7643226 |

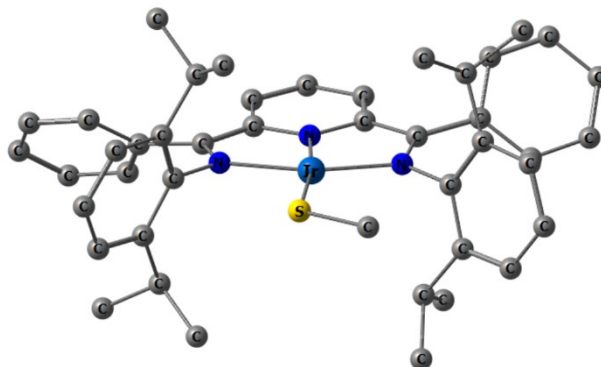

|   |           |            |            |
|---|-----------|------------|------------|
| C | 0.2239675 | 3.5031443  | -2.5760913 |
| H | 0.1502429 | 3.9398497  | -3.5846982 |
| H | 1.0806091 | 2.8168423  | -2.5578724 |
| H | 0.4397194 | 4.3195492  | -1.8709164 |
| C | 1.9204144 | 0.0270698  | -3.7052649 |
| C | 2.8732407 | -0.3060310 | -6.3419917 |
| C | 2.8047437 | -1.0203822 | -4.0330710 |
| C | 1.5215260 | 0.9010390  | -4.7325899 |
| C | 1.9944315 | 0.7344166  | -6.0329315 |
| C | 3.2758788 | -1.1846640 | -5.3343130 |
| H | 3.0962089 | -1.7316679 | -3.2592051 |
| H | 0.8346856 | 1.7153688  | -4.5160556 |
| H | 1.6703999 | 1.4266838  | -6.8116026 |
| H | 3.9492516 | -2.0123078 | -5.5631002 |
| H | 3.2371025 | -0.4347002 | -7.3624367 |
| C | 1.9019031 | -0.0655408 | 3.7233149  |
| C | 2.8662955 | 0.2363598  | 6.3580052  |
| C | 2.8291193 | 0.9451092  | 4.0465717  |
| C | 1.4634023 | -0.9161275 | 4.7532332  |
| C | 1.9430568 | -0.7661470 | 6.0530117  |
| C | 3.3059392 | 1.0938360  | 5.3476749  |
| H | 3.1498889 | 1.6412002  | 3.2707592  |
| H | 0.7367628 | -1.6959379 | 4.5399271  |
| H | 1.5877740 | -1.4398936 | 6.8342126  |
| H | 4.0127089 | 1.8936955  | 5.5743061  |
| H | 3.2349001 | 0.3533147  | 7.3781713  |

**Cpd. 15:** Xmol xyz coordinates (Å) and total energy in Hartree of DFT PBE-D3BJ/def2-TZVP optimized geometry (gas phase); Ir: def2-ECP (60e).

106

Energy = -2563.580686367

|    |            |            |            |
|----|------------|------------|------------|
| Ir | 0.1477314  | -0.1021054 | -0.0388191 |
| S  | 0.2662615  | 0.3604535  | 2.1624774  |
| N  | 0.3997970  | -0.1986294 | -1.9478864 |
| N  | -1.7699608 | -0.1695826 | -0.6933685 |
| N  | 2.1728686  | -0.1573985 | -0.1623602 |
| C  | -1.9275073 | -0.1330279 | -2.0340750 |
| C  | -2.9467414 | -0.2207363 | 0.1276385  |
| C  | -3.2255286 | 0.0233537  | -2.7257025 |
| C  | -1.1512431 | 0.6244683  | 3.2008311  |
| C  | -0.7037457 | -0.1734705 | -2.7815091 |
| C  | -3.6050506 | 0.9776049  | 0.4660475  |
| C  | -4.3096209 | -0.8507366 | -2.5472491 |
| H  | -4.2107342 | -1.7037985 | -1.8807422 |
| C  | -1.2362378 | 1.8368476  | 3.9072849  |
| H  | -0.4916105 | 2.6133807  | 3.7238559  |
| C  | -0.5248703 | -0.2523289 | -4.1658698 |
| H  | -1.3985872 | -0.2668419 | -4.8158155 |
| C  | -4.7231182 | 0.8909402  | 1.3041594  |
| H  | -5.2418282 | 1.8056848  | 1.5952810  |
| C  | -5.5118984 | -0.6389317 | -3.2201980 |
| H  | -6.3422283 | -1.3294856 | -3.0644450 |
| C  | -2.2615989 | 2.0470872  | 4.8274945  |
| H  | -2.3204369 | 2.9976486  | 5.3612745  |
| C  | 0.7669248  | -0.3355891 | -4.6892338 |
| H  | 0.9128914  | -0.4250588 | -5.7655265 |
| C  | -5.1933662 | -0.3373331 | 1.7563750  |
| H  | -6.0692202 | -0.3812296 | 2.4057308  |
| C  | -5.6556727 | 0.4457157  | -4.0881422 |
| H  | -6.5996773 | 0.6108703  | -4.6095367 |
| C  | -3.2047360 | 1.0448674  | 5.0719649  |
| H  | -4.0046937 | 1.2075776  | 5.7960097  |
| C  | 1.8757790  | -0.3002799 | -3.8378136 |
| H  | 2.8869753  | -0.3617627 | -4.2358540 |
| C  | -4.5509768 | -1.5127615 | 1.3713948  |
| H  | -4.9425029 | -2.4732066 | 1.7097341  |
| C  | -4.5828057 | 1.3180217  | -4.2827446 |
| H  | -4.6848546 | 2.1741238  | -4.9515343 |
| C  | -3.1096211 | -0.1689943 | 4.3883789  |
| H  | -3.8378464 | -0.9606797 | 4.5729480  |
| C  | 1.6869868  | -0.2032694 | -2.4563732 |
| C  | -3.4154777 | -1.4843349 | 0.5556104  |
| C  | -3.3804339 | 1.1083900  | -3.6094042 |
| H  | -2.5528799 | 1.8068625  | -3.7426139 |
| C  | -2.0915607 | -0.3808857 | 3.4598975  |
| H  | -2.0172500 | -1.3292818 | 2.9341329  |
| C  | 2.6775638  | -0.1556944 | -1.4102729 |
| C  | -3.1654212 | 2.3246271  | -0.0858684 |
| H  | -2.4275257 | 2.1358358  | -0.8785344 |
| C  | 4.1161184  | -0.0481694 | -1.7340062 |
| C  | -2.4677364 | 3.1813468  | 0.9787655  |
| H  | -3.1181366 | 3.3367168  | 1.8521240  |
| H  | -2.2081280 | 4.1664795  | 0.5621790  |
| H  | -1.5456410 | 2.6985760  | 1.3244273  |
| C  | 5.1000266  | -0.8467641 | -1.1256900 |
| H  | 4.8124790  | -1.5839651 | -0.3799793 |
| C  | -4.3422398 | 3.0818608  | -0.7186381 |
| H  | -4.8646229 | 2.4649228  | -1.4625228 |
| H  | -3.9789627 | 3.9919116  | -1.2188526 |
| H  | -5.0744679 | 3.3945626  | 0.0403821  |
| C  | 6.4441836  | -0.6989476 | -1.4610257 |
| H  | 7.1889876  | -1.3311264 | -0.9752934 |
| C  | -2.7376998 | -2.7774163 | 0.1170497  |
| H  | -2.1964781 | -2.5615714 | -0.8177524 |
| C  | 6.8387499  | 0.2494074  | -2.4076330 |
| H  | 7.8928673  | 0.3653305  | -2.6638424 |
| C  | -1.6882847 | -3.2513414 | 1.1338322  |
| H  | -0.9134444 | -2.4876264 | 1.2870743  |
| H  | -1.1957554 | -4.1670089 | 0.7725457  |
| H  | -2.1581267 | -3.4815808 | 2.1028308  |
| C  | 5.8739255  | 1.0545513  | -3.0157175 |
| H  | 6.1695079  | 1.8128111  | -3.7425272 |
| C  | -3.7349182 | -3.9074533 | -0.1716011 |
| H  | -4.2107011 | -4.2741444 | 0.7498994  |

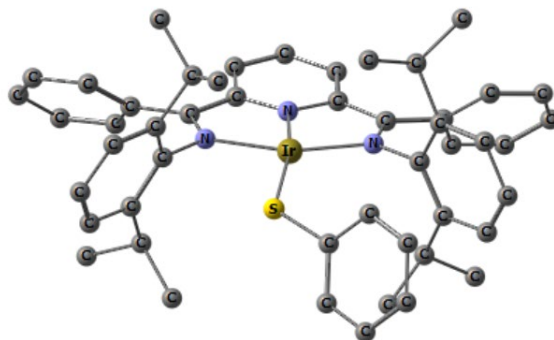

|   |            |            |            |
|---|------------|------------|------------|
| H | -3.2110344 | -4.7599760 | -0.6272367 |
| H | -4.5360212 | -3.5939870 | -0.8568434 |
| C | 4.5285036  | 0.9085710  | -2.6817072 |
| H | 3.7854858  | 1.5671177  | -3.1327946 |
| C | 3.0650439  | -0.1304763 | 0.9648488  |
| C | 3.7271653  | 1.0688608  | 1.3019585  |
| C | 4.5875433  | 1.0510175  | 2.4052531  |
| H | 5.1071269  | 1.9683906  | 2.6867697  |
| C | 4.7890674  | -0.1080738 | 3.1488511  |
| H | 5.4736082  | -0.1018501 | 3.9987476  |
| C | 4.0917958  | -1.2676850 | 2.8212217  |
| H | 4.2295918  | -2.1664901 | 3.4246724  |
| C | 3.2033102  | -1.3025447 | 1.7409594  |
| C | 3.4939601  | 2.3724129  | 0.5562244  |
| H | 2.9281633  | 2.1469797  | -0.3584115 |
| C | 4.8078573  | 3.0483403  | 0.1412798  |
| H | 5.3728711  | 3.3988050  | 1.0178064  |
| H | 4.5996624  | 3.9272989  | -0.4866973 |
| H | 5.4512573  | 2.3638575  | -0.4273846 |
| C | 2.6281893  | 3.3228829  | 1.4000751  |
| H | 1.6712975  | 2.8504791  | 1.6604678  |
| H | 2.4246731  | 4.2506738  | 0.8442586  |
| H | 3.1432025  | 3.5912169  | 2.3351095  |
| C | 2.4293401  | -2.5784083 | 1.4401048  |
| H | 1.6481208  | -2.3229117 | 0.7065481  |
| C | 1.7158356  | -3.1064513 | 2.6912472  |
| H | 2.4293991  | -3.4312071 | 3.4629557  |
| H | 1.0904673  | -3.9732782 | 2.4320550  |
| H | 1.0713292  | -2.3291063 | 3.1246893  |
| C | 3.3195805  | -3.6669188 | 0.8211399  |
| H | 3.7321460  | -3.3577423 | -0.1496436 |
| H | 2.7366239  | -4.5851546 | 0.6548158  |
| H | 4.1617960  | -3.9177330 | 1.4843631  |

**Cpd. 16:** Xmol xyz coordinates (Å) and total energy in Hartree of DFT PBE-D3BJ/def2-TZVP optimized geometry (gas phase); Ir: def2-ECP (60e).

96

Energy = -2332.737632479

|    |            |            |            |
|----|------------|------------|------------|
| H  | 4.0380562  | -0.4321086 | 2.0958981  |
| C  | 3.3596653  | -0.8406615 | 1.3486478  |
| C  | 1.5650112  | -1.9057165 | -0.5183900 |
| C  | 2.1992797  | -0.1376478 | 1.0119878  |
| C  | 3.6326542  | -2.0604693 | 0.7225722  |
| C  | 2.7457521  | -2.5912521 | -0.2193471 |
| N  | 1.3210458  | -0.6898444 | 0.0960599  |
| H  | 4.5452839  | -2.6024095 | 0.9700433  |
| H  | 2.9650159  | -3.5305238 | -0.7245005 |
| C  | 1.7118582  | 1.1219948  | 1.5232343  |
| C  | 0.5177540  | -2.2483224 | -1.4531312 |
| N  | -0.4350286 | -1.3044959 | -1.5869024 |
| N  | 0.4931361  | 1.4712695  | 1.0646523  |
| Ir | -0.2829769 | 0.2705111  | -0.3491262 |
| S  | -2.1777991 | 1.3564405  | -0.9365375 |
| H  | -2.1457343 | 2.4883976  | -0.1768237 |
| C  | -0.1472661 | 2.6739968  | 1.5117351  |
| C  | -1.4601961 | 4.9846796  | 2.3347760  |
| C  | 0.2365682  | 3.9122769  | 0.9571815  |
| C  | -1.2091392 | 2.5650317  | 2.4377243  |
| C  | -1.8434870 | 3.7452662  | 2.8423212  |
| C  | -0.4393381 | 5.0589285  | 1.3904880  |
| H  | -2.6591762 | 3.6877485  | 3.5655207  |
| H  | -0.1604770 | 6.0284879  | 0.9739338  |
| H  | -1.9697694 | 5.8921657  | 2.6627514  |
| C  | -1.5123187 | -1.4749801 | -2.5191477 |
| C  | -3.5873495 | -1.7769344 | -4.3419286 |
| C  | -1.4926266 | -0.7106040 | -3.7076524 |
| C  | -2.5790795 | -2.3390816 | -2.2003799 |
| C  | -3.6099912 | -2.4735147 | -3.1366949 |
| C  | -2.5429881 | -0.8957385 | -4.6131554 |
| H  | -4.4484689 | -3.1349117 | -2.9117364 |
| H  | -2.5466817 | -0.3294724 | -5.5459041 |
| H  | -4.3971959 | -1.9032680 | -5.0624435 |
| C  | 1.3041493  | 4.0189167  | -0.1181359 |
| H  | 1.7986213  | 3.0412667  | -0.2024320 |
| C  | 0.6591929  | 4.3150378  | -1.4820405 |
| H  | 1.4279155  | 4.3578205  | -2.2683929 |
| H  | 0.1346233  | 5.2825121  | -1.4667296 |
| H  | -0.0664908 | 3.5344666  | -1.7501647 |
| C  | 2.3787163  | 5.0563255  | 0.2323198  |
| H  | 3.1751657  | 5.0479144  | -0.5264846 |
| H  | 2.8337785  | 4.8461555  | 1.2100672  |
| H  | 1.9628885  | 6.0745229  | 0.2611794  |
| C  | -0.3747846 | 0.2759038  | -4.0164248 |
| H  | 0.1553430  | 0.4719047  | -3.0706217 |
| C  | -0.9173922 | 1.6230531  | -4.5074493 |
| H  | -0.0921243 | 2.3432336  | -4.6105348 |
| H  | -1.6441161 | 2.0313346  | -3.7917816 |
| H  | -1.4057286 | 1.5386798  | -5.4899363 |
| C  | 0.6438527  | -0.2985788 | -5.0137040 |
| H  | 1.4159379  | 0.4511487  | -5.2427346 |
| H  | 0.1568976  | -0.5819315 | -5.9598031 |
| H  | 1.1539509  | -1.1861065 | -4.6138446 |
| C  | -2.6660516 | -3.0539445 | -0.8631809 |
| H  | -1.6918777 | -2.9591601 | -0.3637674 |
| C  | -3.7018022 | -2.3588428 | 0.0362697  |
| H  | -3.7352161 | -2.8386100 | 1.0262628  |
| H  | -4.7073706 | -2.4196770 | -0.4069149 |
| H  | -3.4522111 | -1.2974506 | 0.1715585  |
| C  | -2.9667407 | -4.5501195 | -1.0148286 |
| H  | -2.2341576 | -5.0410647 | -1.6700428 |
| H  | -3.9692412 | -4.7207944 | -1.4347458 |
| H  | -2.9348189 | -5.0440470 | -0.0323713 |
| C  | -1.6721422 | 1.2251426  | 2.9938013  |
| H  | -1.1047940 | 0.4370530  | 2.4758305  |
| C  | -3.1579977 | 0.9793277  | 2.6957119  |
| H  | -3.7979155 | 1.7252404  | 3.1906499  |
| H  | -3.4572026 | -0.0143414 | 3.0610268  |
| H  | -3.3507781 | 1.0187391  | 1.6150016  |
| C  | -1.3999651 | 1.0992195  | 4.5010449  |
| H  | -1.9185113 | 1.8879337  | 5.0670796  |
| H  | -0.3283764 | 1.1645285  | 4.7363065  |

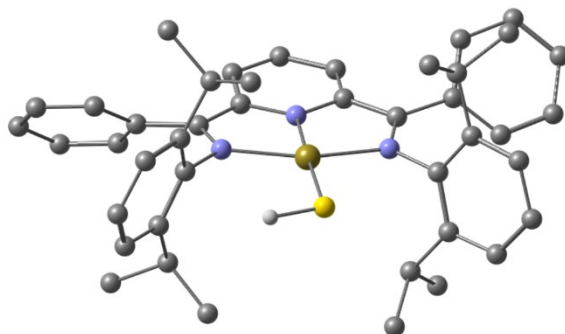



|   |            |            |            |
|---|------------|------------|------------|
| H | -1.7619576 | 0.1284391  | 4.8706615  |
| C | 2.5479082  | 1.9738655  | 2.3919906  |
| C | 4.2144280  | 3.6431183  | 3.9391632  |
| C | 3.8870035  | 2.2073252  | 2.0208535  |
| C | 2.0626272  | 2.5999149  | 3.5532784  |
| C | 2.8879993  | 3.4230270  | 4.3167826  |
| C | 4.7101003  | 3.0317543  | 2.7856854  |
| H | 4.2707650  | 1.7630970  | 1.1017588  |
| H | 1.0306726  | 2.4461835  | 3.8585101  |
| H | 2.4879650  | 3.8967984  | 5.2144916  |
| H | 5.7394130  | 3.2082251  | 2.4694452  |
| H | 4.8562279  | 4.2919938  | 4.5368576  |
| C | 0.4782968  | -3.5713874 | -2.1087725 |
| C | 0.3620224  | -6.1560535 | -3.2341864 |
| C | 0.6884416  | -4.7185282 | -1.3177601 |
| C | 0.2003956  | -3.7504269 | -3.4755895 |
| C | 0.1463037  | -5.0281629 | -4.0290087 |
| C | 0.6311861  | -5.9950951 | -1.8736238 |
| H | 0.8621239  | -4.6033438 | -0.2472884 |
| H | 0.0192846  | -2.8863569 | -4.1100524 |
| H | -0.0694011 | -5.1407420 | -5.0925666 |
| H | 0.7827800  | -6.8676390 | -1.2362031 |
| H | 0.3130983  | -7.1545650 | -3.6709989 |

**Cpd. Ir..H-CH<sub>2</sub>-iPr:** Xmol xyz coordinates (Å) and total energy in Hartree of DFT PBE-D3BJ/def2-TZVP optimized geometry (gas phase); Ir: def2-ECP (60e). The values of the Ir-H and C-H bond distances are given in Å.

94

Energy = -1934.024265491

|    |            |            |            |
|----|------------|------------|------------|
| H  | 4.0856113  | 0.5898704  | -2.0736987 |
| C  | 3.5749874  | 0.4316811  | -1.1257868 |
| C  | 2.2448986  | 0.0831948  | 1.3348949  |
| C  | 2.1888014  | 0.2514615  | -1.1021025 |
| C  | 4.2900353  | 0.3839425  | 0.0774156  |
| C  | 3.6431729  | 0.1792367  | 1.2990569  |
| N  | 1.5723506  | 0.1293185  | 0.1250358  |
| H  | 5.3748101  | 0.4931077  | 0.0592696  |
| H  | 4.2149208  | 0.0884452  | 2.2201460  |
| C  | 1.2474901  | 0.1716404  | -2.1967307 |
| C  | 1.3604876  | -0.0938724 | 2.4597366  |
| N  | 0.0366023  | -0.1877290 | 2.1176260  |
| N  | -0.0442489 | 0.0111614  | -1.7997529 |
| Ir | -0.3145567 | -0.1768686 | 0.1704799  |
| C  | -1.1231109 | -0.1504832 | -2.7237633 |
| C  | -3.3826076 | -0.5329611 | -4.3182243 |
| C  | -1.3031561 | -1.3886147 | -3.3803607 |
| C  | -2.0559880 | 0.9039350  | -2.8684184 |
| C  | -3.1789524 | 0.6850714  | -3.6727683 |
| C  | -2.4477254 | -1.5538439 | -4.1700575 |
| H  | -3.9079573 | 1.4885979  | -3.7970692 |
| H  | -2.6070787 | -2.5065235 | -4.6791284 |
| H  | -4.2674830 | -0.6848163 | -4.9384773 |
| C  | -1.0250790 | -0.0850045 | 3.0554851  |
| C  | -3.1589417 | 0.0106758  | 4.8649153  |
| C  | -2.0859654 | -1.0256748 | 2.9476263  |
| C  | -1.1103376 | 0.9901736  | 3.9744322  |
| C  | -2.1781989 | 0.9970004  | 4.8803053  |
| C  | -3.1264932 | -0.9732871 | 3.8759747  |
| H  | -2.2504718 | 1.8114058  | 5.6026221  |
| H  | -3.9302157 | -1.7077283 | 3.8245520  |
| H  | -3.9707669 | 0.0297724  | 5.5935646  |
| C  | -0.3194032 | -2.5387787 | -3.2382334 |
| H  | 0.5479213  | -2.1756683 | -2.6706659 |
| C  | -0.9267002 | -3.6999920 | -2.4363108 |
| H  | -0.2085643 | -4.5299951 | -2.3583826 |
| H  | -1.8390076 | -4.0841196 | -2.9168971 |
| H  | -1.1830348 | -3.3824884 | -1.4156293 |
| C  | 0.1871657  | -3.0178875 | -4.6062738 |
| H  | 0.9655340  | -3.7844816 | -4.4768023 |
| H  | 0.6162268  | -2.1880190 | -5.1835703 |
| H  | -0.6235233 | -3.4648020 | -5.2010842 |
| C  | -2.1154298 | -1.9931091 | 1.7770897  |
| H  | -1.1062009 | -2.4185932 | 1.6578012  |
| C  | -2.4365913 | -1.2205166 | 0.4771668  |
| H  | -2.2912328 | -1.8146127 | -0.4322505 |
| H  | -2.0804519 | -0.0832186 | 0.3884145  |
| H  | -3.5016582 | -0.9205842 | 0.4851804  |
| C  | -3.0980736 | -3.1570486 | 1.9278344  |
| H  | -2.9994302 | -3.8412685 | 1.0729906  |
| H  | -4.1431174 | -2.8134675 | 1.9547198  |
| H  | -2.9007750 | -3.7288950 | 2.8455081  |
| C  | -0.2088118 | 2.2115766  | 3.8884291  |
| H  | 0.6936139  | 1.9432586  | 3.3270669  |
| C  | -0.9291470 | 3.2995134  | 3.0709065  |
| H  | -0.2838640 | 4.1833328  | 2.9535943  |
| H  | -1.8577753 | 3.6151348  | 3.5701982  |
| H  | -1.1878518 | 2.9258941  | 2.0693014  |
| C  | 0.2397807  | 2.7392125  | 5.2550127  |
| H  | 0.7195587  | 1.9495950  | 5.8490789  |
| H  | -0.6031726 | 3.1435431  | 5.8351081  |
| H  | 0.9643811  | 3.5561026  | 5.1236567  |
| C  | -1.8644901 | 2.2528043  | -2.1894720 |
| H  | -0.9003351 | 2.2238277  | -1.6605780 |
| C  | -2.9512921 | 2.5135719  | -1.1364402 |
| H  | -3.9539880 | 2.5186499  | -1.5901221 |
| H  | -2.7916652 | 3.4892338  | -0.6537340 |
| H  | -2.9317320 | 1.7459087  | -0.3512505 |
| C  | -1.8255509 | 3.4062910  | -3.2041778 |
| H  | -2.7827778 | 3.5054292  | -3.7374706 |
| H  | -1.0380030 | 3.2662785  | -3.9578738 |
| H  | -1.6312809 | 4.3581778  | -2.6883558 |

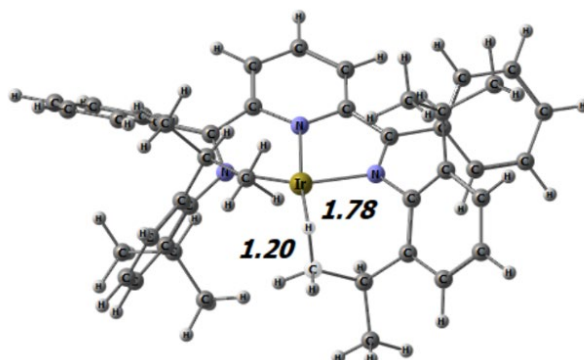

|   |           |            |            |
|---|-----------|------------|------------|
| C | 1.6767484 | 0.2023978  | -3.6020391 |
| C | 2.5043337 | 0.1816767  | -6.3040665 |
| C | 2.7754426 | -0.5763570 | -4.0215925 |
| C | 1.0021382 | 0.9659102  | -4.5736327 |
| C | 1.4092181 | 0.9528104  | -5.9054821 |
| C | 3.1854116 | -0.5822891 | -5.3533126 |
| H | 3.2837643 | -1.2142826 | -3.2979385 |
| H | 0.1527558 | 1.5772312  | -4.2772617 |
| H | 0.8683498 | 1.5551860  | -6.6372962 |
| H | 4.0311422 | -1.2034861 | -5.6532135 |
| H | 2.8208564 | 0.1721650  | -7.3480093 |
| C | 1.8423164 | -0.2493639 | 3.8371656  |
| C | 2.7575207 | -0.5772955 | 6.4904692  |
| C | 2.8621643 | 0.5700308  | 4.3617413  |
| C | 1.2856750 | -1.2314388 | 4.6818353  |
| C | 1.7359594 | -1.3898465 | 5.9893490  |
| C | 3.3175634 | 0.4030660  | 5.6682543  |
| H | 3.2677913 | 1.3764702  | 3.7498826  |
| H | 0.4960894 | -1.8782863 | 4.2988181  |
| H | 1.2895611 | -2.1592842 | 6.6215087  |
| H | 4.1015077 | 1.0578736  | 6.0527968  |
| H | 3.1090338 | -0.7035005 | 7.5154422  |

**Cpd. 8:** Xmol xyz coordinates (Å) and total energy in Hartree of DFT PBE-D3BJ/def2-TZVP optimized geometry (gas phase); Rh: def2-ECP (28e).

99

Energy = -2055.290018032

|    |            |            |            |
|----|------------|------------|------------|
| H  | 4.2964827  | 0.1109923  | -2.1605691 |
| C  | 3.7619460  | 0.0172259  | -1.2163399 |
| C  | 2.3561286  | -0.1487712 | 1.1863228  |
| C  | 2.3629894  | -0.0128165 | -1.2169516 |
| C  | 4.4543153  | -0.0643955 | -0.0061178 |
| C  | 3.7520632  | -0.1555617 | 1.2011529  |
| N  | 1.6824371  | -0.0903143 | -0.0179239 |
| H  | 5.5440566  | -0.0528476 | -0.0016475 |
| H  | 4.2775351  | -0.2300934 | 2.1522692  |
| C  | 1.4534151  | 0.0987047  | -2.3328851 |
| C  | 1.4468134  | -0.2261273 | 2.3116794  |
| N  | 0.1575983  | -0.2980546 | 1.9800192  |
| N  | 0.1602005  | 0.1609245  | -1.9791707 |
| Rh | -0.2144441 | -0.0927245 | -0.0077102 |
| O  | -2.1417818 | -0.1306361 | 0.2803029  |
| C  | -3.1980191 | -0.0547276 | -0.6361341 |
| H  | -2.9466568 | -0.4356341 | -1.6417330 |
| H  | -4.0572167 | -0.6352968 | -0.2499919 |
| H  | -3.5407432 | 0.9919834  | -0.7576501 |
| C  | -0.8531936 | 0.3474255  | -2.9618046 |
| C  | -2.8754975 | 0.7419213  | -4.8282885 |
| C  | -1.2311604 | -0.7247017 | -3.7971977 |
| C  | -1.5128577 | 1.6003451  | -3.0033281 |
| C  | -2.5138752 | 1.7746577  | -3.9629860 |
| C  | -2.2510753 | -0.4979632 | -4.7290562 |
| H  | -3.0339608 | 2.7307925  | -4.0250509 |
| H  | -2.5617620 | -1.3111396 | -5.3869237 |
| H  | -3.6619776 | 0.9004743  | -5.5680433 |
| C  | -0.8654812 | -0.3444947 | 2.9784547  |
| C  | -2.9275097 | -0.4248008 | 4.8448211  |
| C  | -1.5012729 | -1.5750963 | 3.2444720  |
| C  | -1.2743794 | 0.8539610  | 3.5988645  |
| C  | -2.3085255 | 0.7845662  | 4.5384926  |
| C  | -2.5290129 | -1.5895020 | 4.1931903  |
| H  | -2.6407429 | 1.6993791  | 5.0324335  |
| H  | -3.0302714 | -2.5322996 | 4.4205643  |
| H  | -3.7305936 | -0.4572865 | 5.5830693  |
| C  | -0.6215795 | -2.1078604 | -3.6447642 |
| H  | 0.3178415  | -2.0046722 | -3.0854019 |
| C  | -1.5469857 | -2.9992416 | -2.7994304 |
| H  | -1.1047696 | -3.9983929 | -2.6685805 |
| H  | -2.5272670 | -3.1192350 | -3.2851008 |
| H  | -1.7079746 | -2.5643730 | -1.8026662 |
| C  | -0.2811832 | -2.7595874 | -4.9895276 |
| H  | 0.2454212  | -3.7110320 | -4.8244623 |
| H  | 0.3669829  | -2.1093542 | -5.5936010 |
| H  | -1.1842737 | -2.9843698 | -5.5760342 |
| C  | -1.1222308 | -2.8520165 | 2.5099862  |
| H  | -0.2190495 | -2.6403187 | 1.9173678  |
| C  | -2.2323774 | -3.2469623 | 1.5229587  |
| H  | -1.9328670 | -4.1306670 | 0.9391387  |
| H  | -2.4386395 | -2.4162641 | 0.8361554  |
| H  | -3.1610265 | -3.4924311 | 2.0607355  |
| C  | -0.8068869 | -4.0170161 | 3.4591492  |
| H  | -0.4928069 | -4.8997156 | 2.8827755  |
| H  | -1.6895553 | -4.3055216 | 4.0490237  |
| H  | -0.0009004 | -3.7736152 | 4.1666534  |
| C  | -0.6859526 | 2.1983560  | 3.2072454  |
| H  | 0.2253262  | 2.0128185  | 2.6216081  |
| C  | -1.6669506 | 2.9411906  | 2.2840018  |
| H  | -1.2228070 | 3.8818952  | 1.9235578  |
| H  | -2.5970042 | 3.1848178  | 2.8199856  |
| H  | -1.9259301 | 2.3158642  | 1.4180510  |
| C  | -0.2902708 | 3.0513872  | 4.4179574  |
| H  | 0.4094855  | 2.5129033  | 5.0727017  |
| H  | -1.1666501 | 3.3375673  | 5.0181064  |
| H  | 0.1953475  | 3.9808399  | 4.0848256  |
| C  | -1.1652090 | 2.6954014  | -2.0061565 |
| H  | -0.9697878 | 2.1807940  | -1.0453152 |
| C  | -2.3034493 | 3.6915955  | -1.7735238 |
| H  | -2.4680301 | 4.3426575  | -2.6462781 |
| H  | -2.0558550 | 4.3425766  | -0.9229339 |
| H  | -3.2493301 | 3.1814514  | -1.5435393 |

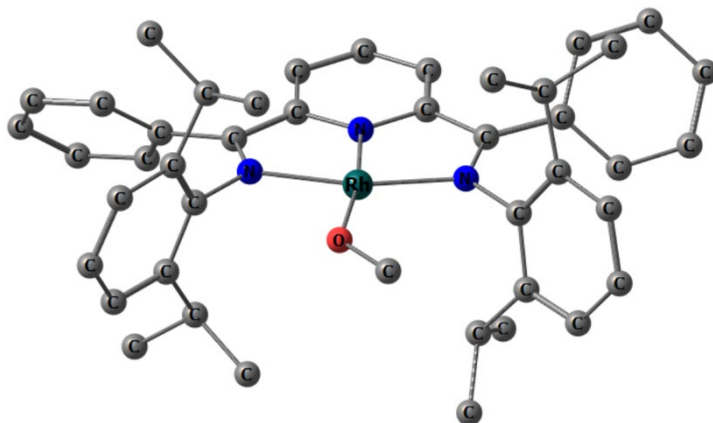

|   |           |            |            |
|---|-----------|------------|------------|
| C | 0.1243545 | 3.4479217  | -2.3722019 |
| H | 0.0258018 | 3.9439531  | -3.3506839 |
| H | 0.9954316 | 2.7809115  | -2.4084496 |
| H | 0.3334357 | 4.2238735  | -1.6207197 |
| C | 1.9418191 | 0.0781991  | -3.7288733 |
| C | 2.8813215 | -0.1027397 | -6.3818106 |
| C | 2.8495859 | -0.9293198 | -4.1098647 |
| C | 1.5116435 | 0.9906745  | -4.7084434 |
| C | 1.9800281 | 0.9003285  | -6.0178559 |
| C | 3.3131846 | -1.0194173 | -5.4212030 |
| H | 3.1650030 | -1.6688127 | -3.3726107 |
| H | 0.8045756 | 1.7741660  | -4.4456718 |
| H | 1.6340818 | 1.6209904  | -6.7604057 |
| H | 4.0048428 | -1.8177159 | -5.6950637 |
| H | 3.2403417 | -0.1731478 | -7.4096401 |
| C | 1.9422937 | -0.1492180 | 3.7026100  |
| C | 2.8657955 | 0.0998972  | 6.3481206  |
| C | 2.7849640 | 0.9144955  | 4.0724574  |
| C | 1.5738056 | -1.0866146 | 4.6803700  |
| C | 2.0338200 | -0.9634658 | 5.9897574  |
| C | 3.2394616 | 1.0391287  | 5.3847311  |
| H | 3.0577000 | 1.6640282  | 3.3280655  |
| H | 0.9217821 | -1.9143399 | 4.4097778  |
| H | 1.7372201 | -1.7026646 | 6.7354054  |
| H | 3.8797974 | 1.8797044  | 5.6568416  |
| H | 3.2194491 | 0.1977825  | 7.3755872  |

**Cpd. TS IrSMc:** Xmol xyz coordinates (Å) and total energy in Hartree of DFT PBE-D3BJ/def2-TZVP optimized geometry (gas phase); Ir: def2-ECP (60e).

99

Energy = -2371.978938635  $\nu(\text{imag}) = -226.81 \text{ cm}^{-1}$

|    |            |            |            |
|----|------------|------------|------------|
| H  | 4.0563678  | 0.6882679  | -2.4410518 |
| C  | 3.5666428  | 0.6255913  | -1.4708362 |
| C  | 2.2608318  | 0.5726740  | 1.0014435  |
| C  | 2.1889004  | 0.3800653  | -1.4004841 |
| C  | 4.2899838  | 0.7938042  | -0.2873491 |
| C  | 3.6502241  | 0.7582004  | 0.9539050  |
| N  | 1.5715818  | 0.3792402  | -0.1721260 |
| H  | 5.3652691  | 0.9677121  | -0.3332951 |
| H  | 4.2137501  | 0.8802696  | 1.8763951  |
| C  | 1.2378731  | 0.1400678  | -2.4745113 |
| C  | 1.3791413  | 0.4926617  | 2.1550899  |
| N  | 0.0844561  | 0.2874273  | 1.8571509  |
| N  | -0.0487553 | 0.1840333  | -2.0834611 |
| Ir | -0.3617090 | 0.3490754  | -0.0980206 |
| S  | -2.6202606 | 0.9669428  | -0.0032286 |
| C  | -3.5771331 | -0.5860136 | 0.1127321  |
| H  | -3.3123350 | -1.1483458 | 1.0177608  |
| H  | -4.6379531 | -0.3066811 | 0.1710249  |
| H  | -3.4239707 | -1.2133893 | -0.7756262 |
| C  | -1.1143582 | -0.1102833 | -2.9926404 |
| C  | -3.2420461 | -0.6306493 | -4.6999549 |
| C  | -1.3757783 | -1.4430620 | -3.3685346 |
| C  | -1.9208799 | 0.9696713  | -3.4255459 |
| C  | -2.9755628 | 0.6772231  | -4.2948472 |
| C  | -2.4558948 | -1.6771978 | -4.2284502 |
| H  | -3.6105777 | 1.4879503  | -4.6524070 |
| H  | -2.6798854 | -2.7008548 | -4.5342818 |
| H  | -4.0748433 | -0.8335141 | -5.3754793 |
| C  | -0.8731899 | 0.0007166  | 2.8874640  |
| C  | -2.7359560 | -0.6056764 | 4.8602808  |
| C  | -1.3389251 | -1.3320516 | 3.0030362  |
| C  | -1.3660394 | 1.0386251  | 3.7013562  |
| C  | -2.3012956 | 0.7031237  | 4.6887285  |
| C  | -2.2647790 | -1.6089935 | 4.0133599  |
| H  | -2.6971538 | 1.4918551  | 5.3308398  |
| H  | -2.6349990 | -2.6269805 | 4.1338841  |
| H  | -3.4602735 | -0.8457134 | 5.6403947  |
| C  | -0.5583218 | -2.6123274 | -2.8467318 |
| H  | 0.3135951  | -2.2094058 | -2.3129931 |
| C  | -1.3712389 | -3.4235446 | -1.8271776 |
| H  | -0.7668765 | -4.2487608 | -1.4205512 |
| H  | -2.2697674 | -3.8567267 | -2.2919222 |
| H  | -1.6929567 | -2.7873842 | -0.9918291 |
| C  | -0.0367023 | -3.5057620 | -3.9802989 |
| H  | 0.6197799  | -4.2899070 | -3.5747126 |
| H  | 0.5359201  | -2.9256522 | -4.7163768 |
| H  | -0.8611525 | -4.0068080 | -4.5088825 |
| C  | -0.8643770 | -2.4169377 | 2.0459752  |
| H  | -0.8160879 | -1.9355137 | 1.0458805  |
| C  | -1.8216895 | -3.6071041 | 1.9506159  |
| H  | -1.5026880 | -4.2745608 | 1.1381200  |
| H  | -2.8526735 | -3.2894217 | 1.7415712  |
| H  | -1.8278357 | -4.2023217 | 2.8769336  |
| C  | 0.5526676  | -2.9221682 | 2.3612470  |
| H  | 0.8457558  | -3.6947612 | 1.6347628  |
| H  | 0.5934756  | -3.3720927 | 3.3656463  |
| H  | 1.3028344  | -2.1225818 | 2.3125643  |
| C  | -0.9576507 | 2.4901744  | 3.5208437  |
| H  | -0.1525965 | 2.5278944  | 2.7731072  |
| C  | -2.1327002 | 3.3123522  | 2.9670428  |
| H  | -1.8148806 | 4.3477741  | 2.7718051  |
| H  | -2.9602415 | 3.3443512  | 3.6924377  |
| H  | -2.5112876 | 2.8704634  | 2.0346792  |
| C  | -0.4234975 | 3.1031950  | 4.8235042  |
| H  | 0.3951897  | 2.5079425  | 5.2486634  |
| H  | -1.2177203 | 3.1785781  | 5.5811975  |
| H  | -0.0492783 | 4.1209164  | 4.6378551  |
| C  | -1.6352295 | 2.3968693  | -2.9817762 |
| H  | -1.2267464 | 2.3239196  | -1.9607417 |
| C  | -2.8979013 | 3.2578319  | -2.9018904 |
| H  | -3.3139842 | 3.4796673  | -3.8970241 |
| H  | -2.6583337 | 4.2209358  | -2.4284132 |
| H  | -3.6653911 | 2.7606465  | -2.2940802 |

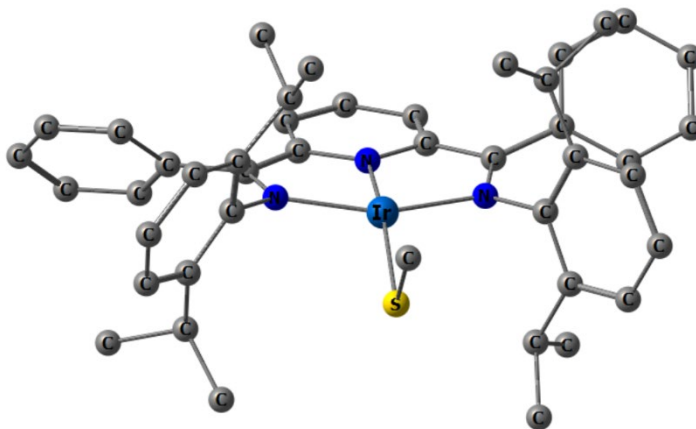

|   |            |            |            |
|---|------------|------------|------------|
| C | -0.5715310 | 3.0878230  | -3.8518924 |
| H | -0.8757804 | 3.1112333  | -4.9103264 |
| H | 0.4059357  | 2.5913211  | -3.7857082 |
| H | -0.4348870 | 4.1275860  | -3.5191862 |
| C | 1.7004868  | -0.2700068 | -3.8151156 |
| C | 2.6208053  | -1.2082027 | -6.3163348 |
| C | 2.7914308  | -1.1599051 | -3.9051710 |
| C | 1.0778970  | 0.1312682  | -5.0124093 |
| C | 1.5370391  | -0.3306154 | -6.2441178 |
| C | 3.2438498  | -1.6242322 | -5.1376654 |
| H | 3.2638551  | -1.5196961 | -2.9908622 |
| H | 0.2254596  | 0.8039555  | -4.9832541 |
| H | 1.0374075  | -0.0011715 | -7.1563268 |
| H | 4.0788902  | -2.3255776 | -5.1751133 |
| H | 2.9726826  | -1.5710242 | -7.2831421 |
| C | 1.9081843  | 0.6509695  | 3.5245329  |
| C | 2.9449130  | 1.0782598  | 6.1105384  |
| C | 2.7332585  | 1.7589262  | 3.8006378  |
| C | 1.6076523  | -0.2351318 | 4.5744124  |
| C | 2.1245202  | -0.0217477 | 5.8509631  |
| C | 3.2445009  | 1.9708078  | 5.0792771  |
| H | 2.9402976  | 2.4810352  | 3.0099570  |
| H | 0.9661028  | -1.0942016 | 4.3927657  |
| H | 1.8796912  | -0.7227336 | 6.6502638  |
| H | 3.8671686  | 2.8455606  | 5.2728510  |
| H | 3.3420643  | 1.2434982  | 7.1130750  |

**Cpd. TS IrSMe\_THF:** Xmol xyz coordinates (Å) and total energy in Hartree DFT PBE-D3BJ/def2-TZVP optimized geometry (gas phase); Ir: def2-ECP (60e).

112

Energy = -2604.22544688  $\nu(\text{imag}) = -58.94 \text{ cm}^{-1}$

|    |              |              |              |
|----|--------------|--------------|--------------|
| H  | -3.278857300 | -1.710126600 | 2.002356800  |
| C  | -3.032002400 | -0.883655600 | 1.338546300  |
| C  | -2.369701000 | 1.261561500  | -0.331548800 |
| C  | -1.684115900 | -0.582377200 | 1.098115400  |
| C  | -4.036306200 | -0.135728100 | 0.726941100  |
| C  | -3.708366900 | 0.924851500  | -0.125453000 |
| N  | -1.376369600 | 0.514369200  | 0.288970900  |
| H  | -5.082128700 | -0.389834500 | 0.898726000  |
| H  | -4.483152400 | 1.490652700  | -0.640257400 |
| C  | -0.510098200 | -1.193606700 | 1.630420900  |
| C  | -1.817583200 | 2.304696600  | -1.151156800 |
| N  | -0.493103000 | 2.161985100  | -1.387625400 |
| N  | 0.653273300  | -0.645495800 | 1.176848400  |
| Ir | 0.412702200  | 0.624278300  | -0.355073200 |
| C  | 2.746781000  | 0.034439500  | -2.917045900 |
| O  | 3.090396300  | 1.764658600  | -0.226134700 |
| C  | 3.599098500  | 2.826578200  | -1.072146400 |
| C  | 4.187672900  | 0.904708700  | 0.173616200  |
| C  | 5.019211700  | 2.429182700  | -1.457955200 |
| C  | 5.467686100  | 1.631173900  | -0.228309700 |
| H  | 4.112484800  | 0.724627900  | 1.252274100  |
| H  | 3.593638000  | 3.767812600  | -0.497180800 |
| H  | 5.651742900  | 3.302826000  | -1.664306800 |
| H  | 2.921528300  | 2.947429800  | -1.926770900 |
| H  | 5.014287600  | 1.790591900  | -2.352858900 |
| H  | 5.788727600  | 2.313675300  | 0.573676500  |
| H  | 6.292716500  | 0.936375900  | -0.434565800 |
| H  | 4.079969100  | -0.064732500 | -0.339687700 |
| C  | 1.872529200  | -0.919897300 | 1.883921300  |
| C  | 4.160469100  | -1.454480500 | 3.390564500  |
| C  | 2.606021300  | -2.096438700 | 1.629639900  |
| C  | 2.300063500  | 0.025382000  | 2.854022000  |
| C  | 3.440647700  | -0.279283300 | 3.604474700  |
| C  | 3.752483700  | -2.338234900 | 2.399650600  |
| H  | 3.784784400  | 0.424550200  | 4.362041100  |
| H  | 4.325305800  | -3.249696800 | 2.219747300  |
| H  | 5.047150800  | -1.669525300 | 3.989511000  |
| C  | 0.202945500  | 3.204622200  | -2.080318000 |
| C  | 1.612635500  | 5.206411000  | -3.410261000 |
| C  | 0.521826700  | 4.396254600  | -1.393511000 |
| C  | 0.551637400  | 3.009004500  | -3.442881900 |
| C  | 1.259097700  | 4.034495600  | -4.080915600 |
| C  | 1.243220900  | 5.380041100  | -2.082073000 |
| H  | 1.540946800  | 3.915448800  | -5.126799200 |
| H  | 1.513244400  | 6.301431900  | -1.562675400 |
| H  | 2.172081700  | 5.985336400  | -3.931266800 |
| H  | 2.798645900  | -0.460422000 | -3.896716500 |
| H  | 3.694612200  | -0.128404200 | -2.389062700 |
| H  | 2.603213600  | 1.109859600  | -3.073596700 |
| S  | 1.348205500  | -0.712523900 | -2.011370300 |
| C  | 2.207266700  | -3.114180500 | 0.575242400  |
| H  | 1.303339400  | -2.744238000 | 0.070594400  |
| C  | 1.902694000  | -4.485226200 | 1.199986200  |
| H  | 2.811051500  | -4.929468000 | 1.634908300  |
| H  | 1.531336300  | -5.176836400 | 0.429258500  |
| H  | 1.148057000  | -4.416908300 | 1.992411700  |
| C  | 3.302441100  | -3.253432300 | -0.492563100 |
| H  | 3.501780400  | -2.288523000 | -0.975397900 |
| H  | 2.980385500  | -3.956514900 | -1.274541700 |
| H  | 4.237898100  | -3.635722500 | -0.055939100 |
| C  | 0.158952600  | 1.745403100  | -4.199691200 |
| H  | 0.333661900  | 0.897271900  | -3.514407100 |
| C  | -1.330920900 | 1.680806900  | -4.580779400 |
| H  | -1.614184900 | 2.514652100  | -5.242381800 |
| H  | -1.990174600 | 1.689129800  | -3.704845300 |
| H  | -1.521999000 | 0.744233100  | -5.124869600 |
| C  | 0.992447000  | 1.512675400  | -5.464405600 |
| H  | 2.070704100  | 1.611358500  | -5.280835100 |
| H  | 0.718709100  | 2.213916700  | -6.268826600 |
| H  | 0.806171700  | 0.497012300  | -5.841467900 |
| C  | 0.110608400  | 4.653546100  | 0.046929800  |
| H  | -0.543671900 | 3.831322800  | 0.367356400  |
| C  | 1.321730800  | 4.655261600  | 0.987886300  |

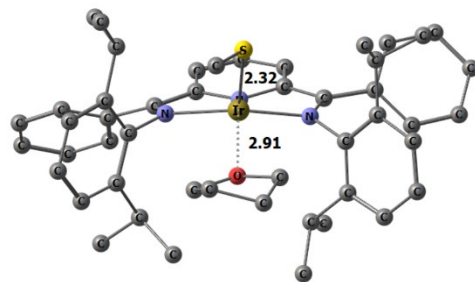



|   |              |              |              |
|---|--------------|--------------|--------------|
| H | 1.837588500  | 3.686656900  | 0.970392300  |
| H | 0.996730100  | 4.856260200  | 2.019560000  |
| H | 2.041456500  | 5.439794800  | 0.707021500  |
| C | -0.680800400 | 5.963782800  | 0.177883100  |
| H | -0.043518400 | 6.836678000  | -0.028489100 |
| H | -1.066911300 | 6.071118400  | 1.202295000  |
| H | -1.532071800 | 5.993218400  | -0.514298200 |
| C | 1.572737700  | 1.347118200  | 3.061951800  |
| H | 1.219287200  | 1.660283000  | 2.063317600  |
| C | 0.334091700  | 1.214218500  | 3.963219000  |
| H | 0.616638300  | 0.869251400  | 4.970278600  |
| H | -0.403383300 | 0.512791900  | 3.553450000  |
| H | -0.159172800 | 2.192165800  | 4.069072800  |
| C | 2.487428800  | 2.451266300  | 3.599332600  |
| H | 3.387280200  | 2.570308500  | 2.979156300  |
| H | 2.805256400  | 2.257754800  | 4.635301000  |
| H | 1.949731100  | 3.408750100  | 3.601563200  |
| C | -2.636310800 | 3.491281800  | -1.489993000 |
| C | -4.225746700 | 5.792399400  | -1.948365100 |
| C | -3.543177900 | 3.966816400  | -0.517155000 |
| C | -2.538964000 | 4.217154100  | -2.692924500 |
| C | -3.323524000 | 5.346903400  | -2.916272300 |
| C | -4.327403000 | 5.095245700  | -0.743052400 |
| H | -3.603300500 | 3.459549000  | 0.445303800  |
| H | -1.843166400 | 3.904539800  | -3.464000100 |
| H | -3.224099300 | 5.884142200  | -3.860834200 |
| H | -5.008236200 | 5.440686000  | 0.036675700  |
| H | -4.834865500 | 6.679638500  | -2.127177900 |
| C | -0.598020600 | -2.332017400 | 2.567768400  |
| C | -0.842209600 | -4.591863500 | 4.245671600  |
| C | 0.065679800  | -2.386547600 | 3.806991900  |
| C | -1.382379900 | -3.440799100 | 2.188687200  |
| C | -1.507021500 | -4.553481600 | 3.017994400  |
| C | -0.054841500 | -3.505055100 | 4.630760200  |
| H | 0.682551700  | -1.551739800 | 4.130800300  |
| H | -1.865525200 | -3.438055700 | 1.210911300  |
| H | -2.109807400 | -5.402975500 | 2.692559400  |
| H | 0.473479500  | -3.523384600 | 5.585406600  |
| H | -0.930513800 | -5.465506600 | 4.893116200  |

**Cpd. IrH(CH<sub>2</sub>O)<sub>3</sub> C<sub>2</sub>: Xmol xyz coordinates (Å) and total energy in Hartree of DFT PBE-D3BJ/def2-TZVP optimized geometry (gas phase); Ir: def2-ECP (60e); selected hydrogen atoms and distances in Å are shown.**

99

Energy = -2049.095157254 H

|    |              |              |              |
|----|--------------|--------------|--------------|
| H  | 4.426670100  | 0.495775600  | -1.969698400 |
| C  | 3.870262400  | 0.397255200  | -1.038481800 |
| C  | 2.428133200  | 0.212708200  | 1.371305300  |
| C  | 2.476075400  | 0.356689300  | -1.075759800 |
| C  | 4.538103500  | 0.309261500  | 0.188637700  |
| C  | 3.823736000  | 0.209944000  | 1.388768500  |
| N  | 1.788437400  | 0.255012400  | 0.133225400  |
| H  | 5.627564600  | 0.321206600  | 0.210768300  |
| H  | 4.347360800  | 0.121580400  | 2.339313000  |
| C  | 1.595366400  | 0.438413600  | -2.202491600 |
| C  | 1.500048500  | 0.107934300  | 2.460728400  |
| N  | 0.199084700  | 0.047251400  | 2.077881400  |
| N  | 0.279378700  | 0.517710200  | -1.875792600 |
| Ir | -0.123488600 | 0.374809900  | 0.102226000  |
| C  | -0.749823400 | 0.666543700  | -2.860401100 |
| C  | -2.904450600 | 0.941486100  | -4.605637400 |
| C  | -1.288897300 | -0.483691400 | -3.472550800 |
| C  | -1.264528800 | 1.959912700  | -3.121734300 |
| C  | -2.348217000 | 2.066486200  | -3.999836600 |
| C  | -2.371193900 | -0.316920600 | -4.345090000 |
| H  | -2.762593500 | 3.053156800  | -4.215989600 |
| H  | -2.804127400 | -1.196198500 | -4.825880700 |
| H  | -3.752531500 | 1.048189600  | -5.284047200 |
| C  | -0.864407000 | -0.115499600 | 3.019042500  |
| C  | -2.978681900 | -0.448282000 | 4.799728300  |
| C  | -1.500814200 | -1.377474900 | 3.100148600  |
| C  | -1.294548800 | 0.986700500  | 3.789125700  |
| C  | -2.359930900 | 0.792098900  | 4.675703800  |
| C  | -2.551258200 | -1.516447600 | 4.013990200  |
| H  | -2.707256900 | 1.630918800  | 5.281893300  |
| H  | -3.051251900 | -2.481901200 | 4.104203500  |
| H  | -3.804221500 | -0.581120500 | 5.501078700  |
| C  | -0.729755300 | -1.873684800 | -3.224883700 |
| H  | 0.107186600  | -1.777164300 | -2.518065200 |
| C  | -1.774145300 | -2.793025800 | -2.574494300 |
| H  | -1.330096700 | -3.775445800 | -2.352863700 |
| H  | -2.629181200 | -2.958904300 | -3.247585100 |
| H  | -2.146613400 | -2.352905300 | -1.640583200 |
| C  | -0.179871900 | -2.485292100 | -4.523078100 |
| H  | 0.285109800  | -3.461072300 | -4.317495600 |
| H  | 0.574424700  | -1.835834600 | -4.987548600 |
| H  | -0.985645600 | -2.647750300 | -5.254862600 |
| C  | -1.062527200 | -2.568909600 | 2.259341700  |
| H  | -0.492777100 | -2.173329200 | 1.407084600  |
| C  | -2.254218300 | -3.343295300 | 1.683194600  |
| H  | -1.896936100 | -4.094884100 | 0.963911300  |
| H  | -2.938044500 | -2.665051100 | 1.158454700  |
| H  | -2.813057100 | -3.879938800 | 2.465087100  |
| C  | -0.135869200 | -3.515648400 | 3.040415800  |
| H  | 0.112581600  | -4.393531000 | 2.425285300  |
| H  | -0.621958500 | -3.875256700 | 3.960662400  |
| H  | 0.809530400  | -3.030612700 | 3.319624900  |
| C  | -0.658170100 | 2.361567100  | 3.670073700  |
| H  | 0.226462400  | 2.271237000  | 3.024573600  |
| C  | -1.616817400 | 3.353449500  | 2.992646100  |
| H  | -1.140919100 | 4.340416400  | 2.891515000  |
| H  | -2.536458800 | 3.479225700  | 3.583637700  |
| H  | -1.901262300 | 3.007239900  | 1.989590700  |
| C  | -0.189638700 | 2.894615000  | 5.031449600  |
| H  | 0.481986800  | 2.183670300  | 5.530644300  |
| H  | -1.041658800 | 3.086275100  | 5.700676000  |
| H  | 0.349811100  | 3.844724200  | 4.902771900  |
| C  | -0.671989100 | 3.222631100  | -2.505602900 |
| H  | 0.230503500  | 2.931759700  | -1.947975200 |
| C  | -1.639072800 | 3.885090700  | -1.511615700 |
| H  | -2.579911700 | 4.167314900  | -2.007739100 |
| H  | -1.189579000 | 4.798970200  | -1.095273800 |
| H  | -1.878849500 | 3.215252600  | -0.677319100 |
| C  | -0.258409100 | 4.250816500  | -3.572235900 |
| H  | -1.129630800 | 4.615379700  | -4.136009100 |
| H  | 0.458774100  | 3.840846800  | -4.296141200 |
| H  | 0.212456600  | 5.120810500  | -3.091493100 |

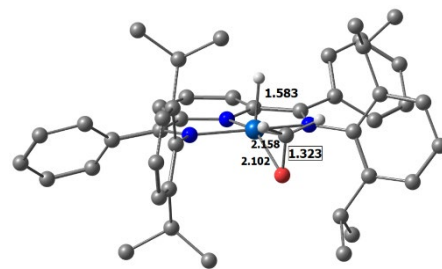

|    |              |              |              |
|----|--------------|--------------|--------------|
| C  | 2.096775400  | 0.305453300  | -3.583614400 |
| C  | 3.060103400  | -0.096605000 | -6.208219200 |
| C  | 3.021176900  | -0.719812700 | -3.871087400 |
| C  | 1.663766900  | 1.118038200  | -4.645519200 |
| C  | 2.138215100  | 0.917760300  | -5.940212300 |
| C  | 3.500172700  | -0.914278600 | -5.165234700 |
| H  | 3.334313300  | -1.392258100 | -3.071884800 |
| H  | 0.945015600  | 1.910039100  | -4.456729300 |
| H  | 1.783687000  | 1.562838900  | -6.745785200 |
| H  | 4.205913800  | -1.722985800 | -5.362170900 |
| H  | 3.427010400  | -0.253529400 | -7.223545500 |
| C  | 1.945984900  | 0.174337000  | 3.867041100  |
| C  | 2.830543800  | 0.428891800  | 6.539394100  |
| C  | 2.886336600  | 1.159174500  | 4.234227500  |
| C  | 1.446758500  | -0.667018400 | 4.878230100  |
| C  | 1.885076800  | -0.539568300 | 6.195053100  |
| C  | 3.327319600  | 1.280419900  | 5.550622800  |
| H  | 3.243557700  | 1.860633700  | 3.479931500  |
| H  | 0.705857100  | -1.424551600 | 4.636524900  |
| H  | 1.481355600  | -1.206498700 | 6.958440500  |
| H  | 4.048382800  | 2.058327900  | 5.807124600  |
| H  | 3.168822300  | 0.526531500  | 7.571956500  |
| O  | -1.979759100 | -0.604486800 | -0.017974500 |
| C  | -2.259017700 | 0.685114200  | 0.074443300  |
| He | -2.619500300 | 1.196447500  | -0.833135100 |
| He | -2.661876600 | 1.055929400  | 1.032700300  |
| He | -0.175754700 | 1.936388300  | 0.354268900  |

**Cpd. TS  $\beta$ -H-elim. Ir(OCH<sub>3</sub>)<sub>3</sub> C<sub>2v</sub>:** Xmol xyz coordinates (Å) and total energy in Hartree of DFT PBE-D3BJ/def2-TZVP optimized geometry (gas phase); Ir: def2-ECP (60e); selected hydrogen atoms and distances in Å are shown.

99

Energy = -2049.084702476  $\nu(\text{imag}) = -605.35 \text{ cm}^{-1}$

symmetry c1

|    |              |              |              |
|----|--------------|--------------|--------------|
| H  | 4.432160800  | 0.360770900  | -1.979669500 |
| C  | 3.876461100  | 0.284387300  | -1.046132500 |
| C  | 2.438516900  | 0.149621600  | 1.369773800  |
| C  | 2.482345300  | 0.291663900  | -1.083659100 |
| C  | 4.547232100  | 0.177420900  | 0.177079700  |
| C  | 3.832000400  | 0.097925000  | 1.377492300  |
| N  | 1.782629200  | 0.230329300  | 0.131444700  |
| H  | 5.636376500  | 0.151635700  | 0.195144600  |
| H  | 4.353323600  | -0.012938400 | 2.327188800  |
| C  | 1.602670100  | 0.391664200  | -2.205583900 |
| C  | 1.517335200  | 0.077942800  | 2.461828800  |
| N  | 0.217393800  | 0.020892400  | 2.077641200  |
| N  | 0.290178700  | 0.471237500  | -1.869407400 |
| Ir | -0.100869100 | 0.263965000  | 0.097809500  |
| C  | -0.735572500 | 0.667378600  | -2.848095600 |
| C  | -2.825328600 | 1.053290800  | -4.651267300 |
| C  | -1.243011700 | -0.440393200 | -3.558539100 |
| C  | -1.266130800 | 1.969168300  | -3.021094000 |
| C  | -2.311069200 | 2.133525300  | -3.936817600 |
| C  | -2.294152700 | -0.218221200 | -4.456380500 |
| H  | -2.728916500 | 3.130103100  | -4.093973400 |
| H  | -2.702150900 | -1.063834900 | -5.013267600 |
| H  | -3.643140000 | 1.203700300  | -5.358019000 |
| C  | -0.850404700 | -0.101338800 | 3.020042200  |
| C  | -2.971745800 | -0.359901000 | 4.804081600  |
| C  | -1.490558500 | -1.358433300 | 3.146256300  |
| C  | -1.283035700 | 1.031358300  | 3.742182800  |
| C  | -2.350904800 | 0.873847300  | 4.633573400  |
| C  | -2.545692400 | -1.458633700 | 4.059776900  |
| H  | -2.698196700 | 1.736359000  | 5.205779700  |
| H  | -3.049593400 | -2.417978400 | 4.184828400  |
| H  | -3.798741600 | -0.464379900 | 5.508561700  |
| C  | -0.692094100 | -1.843573900 | -3.376437600 |
| H  | 0.154704500  | -1.783258000 | -2.678085400 |
| C  | -1.740743600 | -2.770807100 | -2.742627000 |
| H  | -1.312050500 | -3.770633900 | -2.575759900 |
| H  | -2.613729700 | -2.887396600 | -3.403295700 |
| H  | -2.082125300 | -2.366318700 | -1.780688500 |
| C  | -0.169511200 | -2.416500500 | -4.702462700 |
| H  | 0.296040500  | -3.398947900 | -4.533921500 |
| H  | 0.578576700  | -1.756133700 | -5.161390600 |
| H  | -0.988079900 | -2.557334300 | -5.424422400 |
| C  | -1.047563500 | -2.577094500 | 2.347691500  |
| H  | -0.525489400 | -2.203788700 | 1.455976200  |
| C  | -2.232444000 | -3.415589400 | 1.854701800  |
| H  | -1.874402400 | -4.188522200 | 1.158979400  |
| H  | -2.956353500 | -2.787032400 | 1.321228800  |
| H  | -2.746792300 | -3.932928600 | 2.679229500  |
| C  | -0.060297300 | -3.455419500 | 3.134523600  |
| H  | 0.189164500  | -4.355212200 | 2.552337100  |
| H  | -0.495264100 | -3.783136900 | 4.091810300  |
| H  | 0.880621500  | -2.929900500 | 3.346921100  |
| C  | -0.646238000 | 2.399635200  | 3.564417900  |
| H  | 0.220258900  | 2.285523200  | 2.898202000  |
| C  | -1.620420300 | 3.373132700  | 2.882731100  |
| H  | -1.142351600 | 4.352001200  | 2.728381200  |
| H  | -2.520127600 | 3.527845600  | 3.496994100  |
| H  | -1.941476400 | 2.994929900  | 1.901998200  |
| C  | -0.144203300 | 2.973703900  | 4.896973500  |
| H  | 0.543374300  | 2.279810800  | 5.398149800  |
| H  | -0.979680500 | 3.180065200  | 5.582673300  |
| H  | 0.387460800  | 3.921796800  | 4.727458800  |
| C  | -0.732694800 | 3.182105400  | -2.267103200 |
| H  | 0.034310600  | 2.827978200  | -1.563684800 |
| C  | -1.832186500 | 3.870143400  | -1.443669000 |
| H  | -2.617871500 | 4.285304800  | -2.092311800 |
| H  | -1.407657400 | 4.698941300  | -0.858325600 |
| H  | -2.312848000 | 3.174655200  | -0.742965300 |
| C  | -0.077706500 | 4.207352500  | -3.207247200 |
| H  | -0.792208700 | 4.569318900  | -3.961769400 |
| H  | 0.789370900  | 3.789710200  | -3.736193800 |

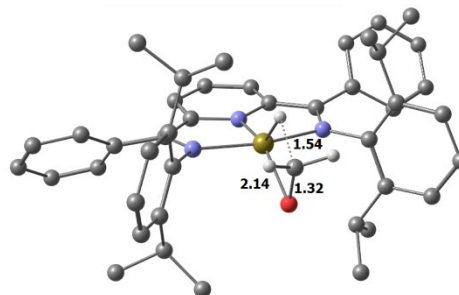

|    |              |              |              |
|----|--------------|--------------|--------------|
| H  | 0.273067300  | 5.077394600  | -2.632454300 |
| C  | 2.094674700  | 0.281899700  | -3.593457900 |
| C  | 3.044018700  | -0.079721700 | -6.229925300 |
| C  | 3.012279800  | -0.742633400 | -3.903783600 |
| C  | 1.656706300  | 1.111698800  | -4.640554100 |
| C  | 2.125853300  | 0.931847000  | -5.940503500 |
| C  | 3.484319000  | -0.917474000 | -5.203224100 |
| H  | 3.325645200  | -1.430609800 | -3.118193200 |
| H  | 0.935888300  | 1.899444100  | -4.439731900 |
| H  | 1.768053400  | 1.590346700  | -6.733608400 |
| H  | 4.185039800  | -1.726281800 | -5.416925500 |
| H  | 3.406173400  | -0.220199900 | -7.249371600 |
| C  | 1.964253100  | 0.187129400  | 3.865383800  |
| C  | 2.847003400  | 0.539204000  | 6.527951400  |
| C  | 2.929925000  | 1.161794100  | 4.192221300  |
| C  | 1.441185500  | -0.595287700 | 4.911543800  |
| C  | 1.878668500  | -0.419723200 | 6.223187800  |
| C  | 3.369232000  | 1.331534900  | 5.503665900  |
| H  | 3.309073500  | 1.817298400  | 3.408054600  |
| H  | 0.682258100  | -1.344383900 | 4.702553000  |
| H  | 1.455724500  | -1.041346700 | 7.013936500  |
| H  | 4.109727600  | 2.101196100  | 5.727684300  |
| H  | 3.184038900  | 0.675009100  | 7.556623000  |
| O  | -1.971378700 | -0.765829000 | -0.036409400 |
| C  | -2.339329600 | 0.500506400  | 0.087931400  |
| He | -2.769102400 | 0.988948600  | -0.806282800 |
| He | -2.810349900 | 0.796133800  | 1.045501500  |
| He | -1.187327600 | 1.503546100  | 0.247590400  |

**Cpd. Rh(H) (CH<sub>2</sub>O) 3 C<sub>2v</sub>:** Xmol xyz coordinates (Å) and total energy in Hartree of DFT PBE-D3BJ/def2-TZVP optimized geometry (gas phase); Ir: def2-ECP (60e); selected hydrogen atoms and distances in Å are shown.

99

Energy = -2055.380120590

|    |            |            |            |
|----|------------|------------|------------|
| H  | 4.4141227  | 0.5105759  | -1.9715680 |
| C  | 3.8633280  | 0.3943133  | -1.0389237 |
| C  | 2.4242570  | 0.1834770  | 1.3610519  |
| C  | 2.4705092  | 0.3183876  | -1.0713865 |
| C  | 4.5357253  | 0.3211890  | 0.1867746  |
| C  | 3.8198538  | 0.2150131  | 1.3848582  |
| N  | 1.7842888  | 0.1866213  | 0.1287768  |
| H  | 5.6245235  | 0.3592597  | 0.2094992  |
| H  | 4.3411495  | 0.1509377  | 2.3387005  |
| C  | 1.5900722  | 0.4078989  | -2.2020775 |
| C  | 1.4979937  | 0.0919015  | 2.4561754  |
| N  | 0.2045293  | 0.0173622  | 2.0761024  |
| N  | 0.2826422  | 0.4934854  | -1.8755605 |
| Rh | -0.1175091 | 0.3209138  | 0.0986310  |
| C  | -0.7508778 | 0.6635422  | -2.8454652 |
| C  | -2.9024675 | 0.9874170  | -4.5886312 |
| C  | -1.3053789 | -0.4721737 | -3.4729113 |
| C  | -1.2545433 | 1.9660425  | -3.0869673 |
| C  | -2.3357320 | 2.0971626  | -3.9647593 |
| C  | -2.3842665 | -0.2806342 | -4.3442692 |
| H  | -2.7395503 | 3.0914463  | -4.1659279 |
| H  | -2.8268006 | -1.1481161 | -4.8375776 |
| H  | -3.7475580 | 1.1132130  | -5.2675358 |
| C  | -0.8611998 | -0.1285606 | 3.0106952  |
| C  | -2.9808993 | -0.4445161 | 4.7896912  |
| C  | -1.5005595 | -1.3892233 | 3.1017475  |
| C  | -1.2942852 | 0.9814840  | 3.7694433  |
| C  | -2.3617901 | 0.7947046  | 4.6551635  |
| C  | -2.5527848 | -1.5201935 | 4.0142092  |
| H  | -2.7108589 | 1.6390424  | 5.2527108  |
| H  | -3.0533525 | -2.4845928 | 4.1118848  |
| H  | -3.8073872 | -0.5705077 | 5.4912181  |
| C  | -0.7621240 | -1.8714702 | -3.2440313 |
| H  | 0.0612638  | -1.7957042 | -2.5190051 |
| C  | -1.8250181 | -2.7963133 | -2.6332371 |
| H  | -1.3912693 | -3.7856999 | -2.4227312 |
| H  | -2.6675961 | -2.9437930 | -3.3261033 |
| H  | -2.2117753 | -2.3726136 | -1.6976786 |
| C  | -0.1941667 | -2.4595434 | -4.5456906 |
| H  | 0.2569238  | -3.4447524 | -4.3545063 |
| H  | 0.5747602  | -1.8077863 | -4.9820120 |
| H  | -0.9885313 | -2.5959588 | -5.2951024 |
| C  | -1.0581925 | -2.5843105 | 2.2688495  |
| H  | -0.5022936 | -2.1888304 | 1.4075568  |
| C  | -2.2454181 | -3.3781477 | 1.7111869  |
| H  | -1.8850069 | -4.1325550 | 0.9964258  |
| H  | -2.9405579 | -2.7129153 | 1.1844153  |
| H  | -2.7927430 | -3.9135522 | 2.5020914  |
| C  | -0.1115811 | -3.5104505 | 3.0504784  |
| H  | 0.1439550  | -4.3908997 | 2.4418856  |
| H  | -0.5832331 | -3.8677250 | 3.9791987  |
| H  | 0.8294236  | -3.0090262 | 3.3154523  |
| C  | -0.6597375 | 2.3559148  | 3.6368334  |
| H  | 0.2267412  | 2.2602243  | 2.9947485  |
| C  | -1.6175175 | 3.3377773  | 2.9433806  |
| H  | -1.1453489 | 4.3261567  | 2.8385486  |
| H  | -2.5433420 | 3.4633866  | 3.5246147  |
| H  | -1.8889574 | 2.9825071  | 1.9399427  |
| C  | -0.1990836 | 2.9062201  | 4.9939205  |
| H  | 0.4678391  | 2.2008351  | 5.5069892  |
| H  | -1.0553881 | 3.1078152  | 5.6546788  |
| H  | 0.3426707  | 3.8537560  | 4.8563009  |
| C  | -0.6528789 | 3.2130165  | -2.4484350 |
| H  | 0.2326214  | 2.9019260  | -1.8749377 |
| C  | -1.6285618 | 3.8800320  | -1.4661169 |
| H  | -2.5565003 | 4.1811458  | -1.9752523 |
| H  | -1.1733697 | 4.7822131  | -1.0309289 |
| H  | -1.8912351 | 3.2047278  | -0.6429219 |
| C  | -0.2019816 | 4.2435467  | -3.4972853 |
| H  | -1.0551729 | 4.6232306  | -4.0784963 |
| H  | 0.5273200  | 3.8298624  | -4.2069311 |
| H  | 0.2689320  | 5.1039633  | -2.9994931 |

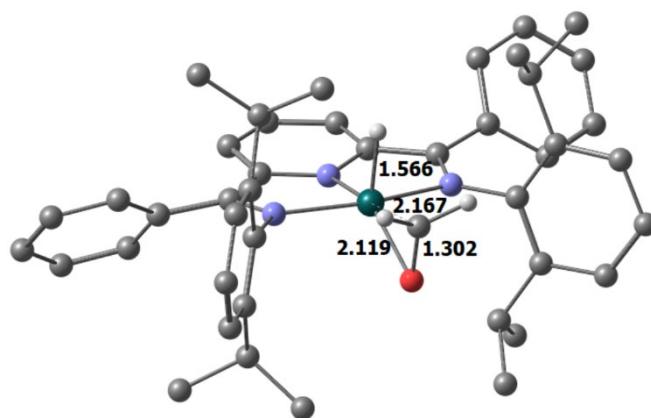

|   |            |            |            |
|---|------------|------------|------------|
| C | 2.0973979  | 0.2876857  | -3.5828503 |
| C | 3.0661293  | -0.1004667 | -6.2070168 |
| C | 3.0323273  | -0.7279937 | -3.8710470 |
| C | 1.6552284  | 1.0968608  | -4.6438275 |
| C | 2.1341652  | 0.9045162  | -5.9379942 |
| C | 3.5131601  | -0.9160726 | -5.1653936 |
| H | 3.3516830  | -1.3989214 | -3.0730767 |
| H | 0.9257496  | 1.8790791  | -4.4550120 |
| H | 1.7739036  | 1.5472882  | -6.7428192 |
| H | 4.2265192  | -1.7177895 | -5.3633554 |
| H | 3.4350617  | -0.2522056 | -7.2223992 |
| C | 1.9455328  | 0.1868998  | 3.8617308  |
| C | 2.8241131  | 0.4945419  | 6.5292954  |
| C | 2.8725666  | 1.1895585  | 4.2132433  |
| C | 1.4547933  | -0.6442760 | 4.8851497  |
| C | 1.8912579  | -0.4913571 | 6.1998630  |
| C | 3.3103808  | 1.3373540  | 5.5280802  |
| H | 3.2203449  | 1.8844474  | 3.4485709  |
| H | 0.7222989  | -1.4137286 | 4.6547833  |
| H | 1.4954303  | -1.1510074 | 6.9736138  |
| H | 4.0202926  | 2.1290527  | 5.7731703  |
| H | 3.1600318  | 0.6128082  | 7.5604751  |
| O | -1.9953129 | -0.6507732 | -0.0422884 |
| C | -2.2644497 | 0.6162346  | 0.0896195  |
| H | -2.5904571 | 1.1837940  | -0.7989001 |
| H | -2.6170377 | 0.9864674  | 1.0692884  |
| H | -0.2361734 | 1.8629186  | 0.3457213  |





**Cpd. 5:** Xmol xyz coordinates (Å) and total energy in Hartree of DFT PBE-D3BJ/def2-TZVP optimized geometry (gas phase); Ir: def2-ECP (60e).

95

Energy = -2394.133861998

|    |            |            |            |
|----|------------|------------|------------|
| H  | 4.1847381  | 0.0864803  | -2.2531880 |
| C  | 3.6409143  | 0.0110669  | -1.3130549 |
| C  | 2.2180316  | -0.1077650 | 1.0928042  |
| C  | 2.2431179  | 0.0214192  | -1.3234687 |
| C  | 4.3207515  | -0.0946025 | -0.0964110 |
| C  | 3.6146144  | -0.1660134 | 1.1076980  |
| N  | 1.5609228  | -0.0268370 | -0.1214191 |
| H  | 5.4101855  | -0.1213573 | -0.0865105 |
| H  | 4.1370384  | -0.2673668 | 2.0574714  |
| C  | 1.3328674  | 0.1261872  | -2.4470121 |
| C  | 1.2835482  | -0.1661746 | 2.1997016  |
| N  | -0.0076430 | -0.1910150 | 1.8310371  |
| N  | 0.0382039  | 0.2164883  | -2.1016480 |
| Ir | -0.3361652 | 0.0217880  | -0.1383895 |
| Cl | -2.6446251 | 0.0851060  | -0.1587680 |
| C  | -0.9818522 | 0.3589339  | -3.1005798 |
| C  | -2.9538904 | 0.6718675  | -5.0287022 |
| C  | -1.3596667 | -0.7571823 | -3.8731775 |
| C  | -1.6234371 | 1.6102305  | -3.2202227 |
| C  | -2.5992604 | 1.7443033  | -4.2133090 |
| C  | -2.3534348 | -0.5702557 | -4.8400838 |
| H  | -3.0998666 | 2.7054683  | -4.3402489 |
| H  | -2.6660291 | -1.4177688 | -5.4522297 |
| H  | -3.7196231 | 0.7980755  | -5.7959492 |
| C  | -1.0515762 | -0.2819797 | 2.8113111  |
| C  | -3.0728998 | -0.4938046 | 4.7019199  |
| C  | -1.7569801 | -1.4994509 | 2.9191448  |
| C  | -1.3870778 | 0.8522725  | 3.5771095  |
| C  | -2.4071836 | 0.7163759  | 4.5248703  |
| C  | -2.7568192 | -1.5835370 | 3.8937152  |
| H  | -2.6882938 | 1.5790592  | 5.1310499  |
| H  | -3.3067308 | -2.5185838 | 4.0115567  |
| H  | -3.8585949 | -0.5805806 | 5.4543066  |
| C  | -0.7896091 | -2.1416516 | -3.6180411 |
| H  | 0.1137820  | -2.0317083 | -3.0021635 |
| C  | -1.7932396 | -2.9695638 | -2.7969271 |
| H  | -1.3703054 | -3.9561054 | -2.5530571 |
| H  | -2.7234380 | -3.1262938 | -3.3637963 |
| H  | -2.0501906 | -2.4562289 | -1.8598293 |
| C  | -0.3811890 | -2.8645759 | -4.9066923 |
| H  | 0.1024949  | -3.8227934 | -4.6657519 |
| H  | 0.3239739  | -2.2623981 | -5.4964441 |
| H  | -1.2519930 | -3.0890294 | -5.5401375 |
| C  | -1.4541814 | -2.6895820 | 2.0204682  |
| H  | -0.8600696 | -2.3128488 | 1.1713380  |
| C  | -2.7312234 | -3.2991096 | 1.4300341  |
| H  | -2.4699217 | -4.0784344 | 0.6987028  |
| H  | -3.3239807 | -2.5295283 | 0.9180091  |
| H  | -3.3591218 | -3.7688777 | 2.2020674  |
| C  | -0.6163006 | -3.7588257 | 2.7386367  |
| H  | -0.4447319 | -4.6184154 | 2.0736153  |
| H  | -1.1311789 | -4.1262071 | 3.6399197  |
| H  | 0.3679341  | -3.3744786 | 3.0424007  |
| C  | -0.7430529 | 2.2061042  | 3.3336631  |
| H  | 0.1650479  | 2.0504110  | 2.7348623  |
| C  | -1.6877622 | 3.0838330  | 2.4946686  |
| H  | -1.2108435 | 4.0476936  | 2.2598774  |
| H  | -2.6192932 | 3.2874561  | 3.0441912  |
| H  | -1.9527461 | 2.5842406  | 1.5524337  |
| C  | -0.3226447 | 2.9075624  | 4.6303525  |
| H  | 0.3397802  | 2.2704306  | 5.2328176  |
| H  | -1.1926387 | 3.1761573  | 5.2475546  |
| H  | 0.2135558  | 3.8398813  | 4.3991991  |
| C  | -1.2775830 | 2.7829577  | -2.3143378 |
| H  | -0.7294707 | 2.3739893  | -1.4493241 |
| C  | -2.5323081 | 3.4667219  | -1.7588441 |
| H  | -3.1096692 | 3.9734439  | -2.5468121 |
| H  | -2.2457934 | 4.2288540  | -1.0189269 |
| H  | -3.1835247 | 2.7335282  | -1.2646841 |
| C  | -0.3594465 | 3.8002016  | -3.0094113 |
| H  | -0.8266148 | 4.1940688  | -3.9254141 |
| H  | 0.6093000  | 3.3589995  | -3.2843553 |

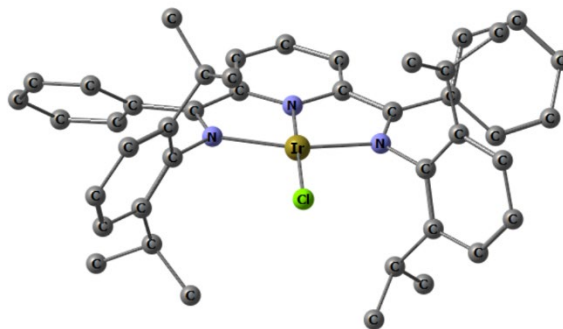

|   |            |            |            |
|---|------------|------------|------------|
| H | -0.1576273 | 4.6503179  | -2.3406939 |
| C | 1.8229068  | 0.0468500  | -3.8381368 |
| C | 2.7660134  | -0.2405318 | -6.4783027 |
| C | 2.7235687  | -0.9814446 | -4.1773938 |
| C | 1.4007616  | 0.9248272  | -4.8515671 |
| C | 1.8717280  | 0.7824755  | -6.1550897 |
| C | 3.1881442  | -1.1246163 | -5.4834989 |
| H | 3.0309270  | -1.6963065 | -3.4131597 |
| H | 0.6947808  | 1.7191153  | -4.6207562 |
| H | 1.5319972  | 1.4767605  | -6.9249549 |
| H | 3.8725503  | -1.9390021 | -5.7260957 |
| H | 3.1269944  | -0.3521190 | -7.5017569 |
| C | 1.7517951  | -0.1110253 | 3.5994438  |
| C | 2.6600751  | 0.1286608  | 6.2564720  |
| C | 2.6964692  | 0.8709145  | 3.9558527  |
| C | 1.2681238  | -0.9669904 | 4.6041615  |
| C | 1.7218082  | -0.8484097 | 5.9161629  |
| C | 3.1439009  | 0.9905725  | 5.2703099  |
| H | 3.0530863  | 1.5695020  | 3.1979866  |
| H | 0.5277442  | -1.7250580 | 4.3596939  |
| H | 1.3338678  | -1.5248209 | 6.6791216  |
| H | 3.8637560  | 1.7695990  | 5.5260405  |
| H | 3.0074552  | 0.2221005  | 7.2864341  |

**Cpd. RhCl1:** Xmol xyz coordinates (Å) and total energy in Hartree of DFT PBE-D3BJ/def2-TZVP optimized geometry (gas phase); Ir: def2-ECP (60e).

95

Energy = -2400.316448818

|    |            |            |            |
|----|------------|------------|------------|
| H  | 4.1669786  | 0.0749319  | -2.2526902 |
| C  | 3.6250617  | 0.0079930  | -1.3109004 |
| C  | 2.2009386  | -0.0923745 | 1.0865427  |
| C  | 2.2267168  | 0.0185051  | -1.3151605 |
| C  | 4.3060931  | -0.0880954 | -0.0943392 |
| C  | 3.5979643  | -0.1507240 | 1.1088419  |
| N  | 1.5468281  | -0.0196641 | -0.1207209 |
| H  | 5.3955320  | -0.1144822 | -0.0837963 |
| H  | 4.1179904  | -0.2445965 | 2.0606787  |
| C  | 1.3177249  | 0.1157106  | -2.4481442 |
| C  | 1.2667394  | -0.1472260 | 2.2017089  |
| N  | -0.0160095 | -0.1831171 | 1.8394279  |
| N  | 0.0321219  | 0.2200983  | -2.1102890 |
| Rh | -0.3490286 | 0.0305494  | -0.1385096 |
| Cl | -2.6571639 | 0.0970127  | -0.1593894 |
| C  | -0.9868518 | 0.3582739  | -3.1024912 |
| C  | -2.9527448 | 0.6847845  | -5.0341280 |
| C  | -1.3601209 | -0.7522535 | -3.8863782 |
| C  | -1.6375781 | 1.6070316  | -3.2074141 |
| C  | -2.6093037 | 1.7489379  | -4.2025699 |
| C  | -2.3495628 | -0.5576353 | -4.8561941 |
| H  | -3.1173767 | 2.7071385  | -4.3170855 |
| H  | -2.6587568 | -1.3996433 | -5.4773880 |
| H  | -3.7151724 | 0.8169247  | -5.8035884 |
| C  | -1.0586836 | -0.2759427 | 2.8118285  |
| C  | -3.0699287 | -0.5167336 | 4.7090466  |
| C  | -1.7759503 | -1.4896731 | 2.8936654  |
| C  | -1.3870088 | 0.8457796  | 3.5999343  |
| C  | -2.4008393 | 0.6943613  | 4.5521023  |
| C  | -2.7694100 | -1.5896518 | 3.8722325  |
| H  | -2.6766172 | 1.5460130  | 5.1758818  |
| H  | -3.3286735 | -2.5208742 | 3.9691890  |
| H  | -3.8499335 | -0.6161108 | 5.4657292  |
| C  | -0.7994349 | -2.1397391 | -3.6279461 |
| H  | 0.1128631  | -2.0345462 | -3.0244230 |
| C  | -1.8029517 | -2.9470283 | -2.7855755 |
| H  | -1.3853538 | -3.9322417 | -2.5273744 |
| H  | -2.7374995 | -3.1061727 | -3.3443214 |
| H  | -2.0517248 | -2.4149392 | -1.8564119 |
| C  | -0.4139122 | -2.8803076 | -4.9129269 |
| H  | 0.0602719  | -3.8419856 | -4.6667162 |
| H  | 0.2917955  | -2.2928809 | -5.5163580 |
| H  | -1.2936773 | -3.1015677 | -5.5350719 |
| C  | -1.4792694 | -2.6498945 | 1.9561602  |
| H  | -1.0019326 | -2.2177606 | 1.0597755  |
| C  | -2.7523528 | -3.3561274 | 1.4801531  |
| H  | -2.5006368 | -4.0927695 | 0.7033419  |
| H  | -3.4560637 | -2.6306750 | 1.0503403  |
| H  | -3.2574303 | -3.8982569 | 2.2940497  |
| C  | -0.4867425 | -3.6504321 | 2.5675495  |
| H  | -0.3141703 | -4.4874888 | 1.8746802  |
| H  | -0.8738059 | -4.0653000 | 3.5111823  |
| H  | 0.4888709  | -3.1868856 | 2.7736536  |
| C  | -0.7521187 | 2.2046170  | 3.3623684  |
| H  | 0.1646279  | 2.0573702  | 2.7745343  |
| C  | -1.6979184 | 3.0669773  | 2.5077405  |
| H  | -1.2282056 | 4.0332254  | 2.2680616  |
| H  | -2.6352009 | 3.2661632  | 3.0489982  |
| H  | -1.9529531 | 2.5559755  | 1.5684359  |
| C  | -0.3536577 | 2.9167282  | 4.6595149  |
| H  | 0.3101054  | 2.2906741  | 5.2717165  |
| H  | -1.2325427 | 3.1786916  | 5.2669641  |
| H  | 0.1732486  | 3.8544176  | 4.4286486  |
| C  | -1.2953267 | 2.7601744  | -2.2765755 |
| H  | -0.8411622 | 2.3152070  | -1.3747814 |
| C  | -2.5400440 | 3.5226426  | -1.8122381 |
| H  | -3.0190430 | 4.0772103  | -2.6333797 |
| H  | -2.2614757 | 4.2555436  | -1.0409933 |
| H  | -3.2743552 | 2.8304031  | -1.3790933 |
| C  | -0.2592529 | 3.7133401  | -2.8910001 |
| H  | -0.6242634 | 4.1365705  | -3.8396596 |
| H  | 0.6972166  | 3.2080088  | -3.0888344 |
| H  | -0.0548012 | 4.5479949  | -2.2038783 |

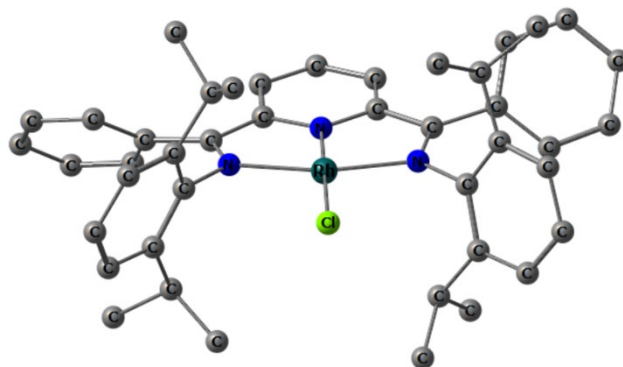

|   |           |            |            |
|---|-----------|------------|------------|
| C | 1.8182131 | 0.0238297  | -3.8367927 |
| C | 2.7671447 | -0.2883666 | -6.4700637 |
| C | 2.7121861 | -1.0133718 | -4.1647182 |
| C | 1.4047947 | 0.8984954  | -4.8563980 |
| C | 1.8801700 | 0.7442920  | -6.1569306 |
| C | 3.1792813 | -1.1694977 | -5.4686386 |
| H | 3.0125632 | -1.7246298 | -3.3943942 |
| H | 0.7031058 | 1.6987810  | -4.6325004 |
| H | 1.5482962 | 1.4352762  | -6.9330680 |
| H | 3.8582604 | -1.9904379 | -5.7038397 |
| H | 3.1299462 | -0.4098768 | -7.4917356 |
| C | 1.7448326 | -0.0912844 | 3.6002800  |
| C | 2.6594968 | 0.1506786  | 6.2530910  |
| C | 2.6836669 | 0.8965845  | 3.9539549  |
| C | 1.2688950 | -0.9522154 | 4.6042208  |
| C | 1.7273271 | -0.8329504 | 5.9144517  |
| C | 3.1339906 | 1.0181095  | 5.2674897  |
| H | 3.0335301 | 1.5982624  | 3.1957671  |
| H | 0.5316514 | -1.7139130 | 4.3606601  |
| H | 1.3464817 | -1.5123869 | 6.6781866  |
| H | 3.8493071 | 1.8015120  | 5.5222739  |
| H | 3.0090772 | 0.2450224  | 7.2822199  |

**Cpd. RhOH:** Xmol xyz coordinates (Å) and total energy in Hartree of DFT PBE-D3BJ/def2-TZVP optimized geometry (gas phase); Ir: def2-ECP (60e).

96

Energy = -2016.034716372

|    |            |            |            |
|----|------------|------------|------------|
| H  | 4.2400547  | 0.1467206  | -2.2297516 |
| C  | 3.6886730  | 0.0540600  | -1.2953011 |
| C  | 2.2457580  | -0.1157059 | 1.0906625  |
| C  | 2.2907993  | 0.0606002  | -1.3141338 |
| C  | 4.3602324  | -0.0704764 | -0.0754271 |
| C  | 3.6417524  | -0.1687951 | 1.1207394  |
| N  | 1.5959728  | -0.0095431 | -0.1221072 |
| H  | 5.4496267  | -0.0922653 | -0.0563854 |
| H  | 4.1555632  | -0.2862816 | 2.0737146  |
| C  | 1.3936026  | 0.1710382  | -2.4464010 |
| C  | 1.3072538  | -0.1951254 | 2.1933863  |
| N  | 0.0214621  | -0.2080020 | 1.8286105  |
| N  | 0.0992512  | 0.2430007  | -2.1108042 |
| Rh | -0.2954379 | 0.0228520  | -0.1583636 |
| O  | -2.2522289 | 0.0256310  | -0.1385269 |
| H  | -2.6028479 | 0.0961124  | -1.0469609 |
| C  | -0.9410915 | 0.3263924  | -3.0851325 |
| C  | -3.0543995 | 0.4834607  | -4.8935490 |
| C  | -1.3121627 | -0.8284977 | -3.8102990 |
| C  | -1.6442637 | 1.5459396  | -3.2181076 |
| C  | -2.6946114 | 1.5988025  | -4.1416645 |
| C  | -2.3742301 | -0.7191210 | -4.7144089 |
| H  | -3.2412017 | 2.5351284  | -4.2696924 |
| H  | -2.6790552 | -1.5986036 | -5.2839828 |
| H  | -3.8760734 | 0.5465492  | -5.6087042 |
| C  | -1.0234867 | -0.2471311 | 2.8027319  |
| C  | -3.0805989 | -0.3357365 | 4.6741308  |
| C  | -1.7805693 | -1.4299679 | 2.9335229  |
| C  | -1.3176866 | 0.9129145  | 3.5531418  |
| C  | -2.3535392 | 0.8382918  | 4.4896855  |
| C  | -2.7999257 | -1.4517600 | 3.8911347  |
| H  | -2.5999800 | 1.7206438  | 5.0822613  |
| H  | -3.3886107 | -2.3623679 | 4.0189668  |
| H  | -3.8789950 | -0.3738963 | 5.4171380  |
| C  | -0.6523533 | -2.1745851 | -3.5667784 |
| H  | 0.2754440  | -2.0031824 | -3.0043881 |
| C  | -1.5585873 | -3.0433370 | -2.6783602 |
| H  | -1.0737505 | -4.0060725 | -2.4565910 |
| H  | -2.5163801 | -3.2502599 | -3.1796564 |
| H  | -1.7724133 | -2.5380002 | -1.7258102 |
| C  | -0.2740218 | -2.8933226 | -4.8666018 |
| H  | 0.2706735  | -3.8215490 | -4.6392471 |
| H  | 0.3685287  | -2.2634181 | -5.4971403 |
| H  | -1.1621487 | -3.1715217 | -5.4532117 |
| C  | -1.5284283 | -2.6551950 | 2.0689351  |
| H  | -0.7129541 | -2.4088448 | 1.3720863  |
| C  | -2.7664888 | -2.9794140 | 1.2201468  |
| H  | -2.5572634 | -3.8258926 | 0.5487722  |
| H  | -3.0446473 | -2.1042708 | 0.6176687  |
| H  | -3.6220271 | -3.2578039 | 1.8545687  |
| C  | -1.0962753 | -3.8748449 | 2.8961137  |
| H  | -0.9236914 | -4.7389976 | 2.2374323  |
| H  | -1.8712794 | -4.1581432 | 3.6237323  |
| H  | -0.1657971 | -3.6902394 | 3.4529567  |
| C  | -0.6148160 | 2.2331698  | 3.2896424  |
| H  | 0.3286285  | 2.0212254  | 2.7681026  |
| C  | -1.4708256 | 3.0819462  | 2.3342097  |
| H  | -0.9530012 | 4.0189846  | 2.0777173  |
| H  | -2.4345676 | 3.3380353  | 2.8001858  |
| H  | -1.6779676 | 2.5305612  | 1.4068230  |
| C  | -0.2632286 | 2.9986634  | 4.5689801  |
| H  | 0.3366348  | 2.3804405  | 5.2514770  |
| H  | -1.1622323 | 3.3312008  | 5.1088527  |
| H  | 0.3172443  | 3.8995819  | 4.3208130  |
| C  | -1.2908797 | 2.7799068  | -2.4005229 |
| H  | -0.4661270 | 2.5060497  | -1.7253299 |
| C  | -2.4710128 | 3.2169417  | -1.5203569 |
| H  | -3.3423958 | 3.4980278  | -2.1312681 |
| H  | -2.1902046 | 4.0917555  | -0.9150717 |
| H  | -2.7685021 | 2.4095810  | -0.8378208 |
| C  | -0.8186993 | 3.9426849  | -3.2861735 |
| H  | -1.6068558 | 4.2561812  | -3.9866336 |
| H  | 0.0696063  | 3.6797970  | -3.8782542 |

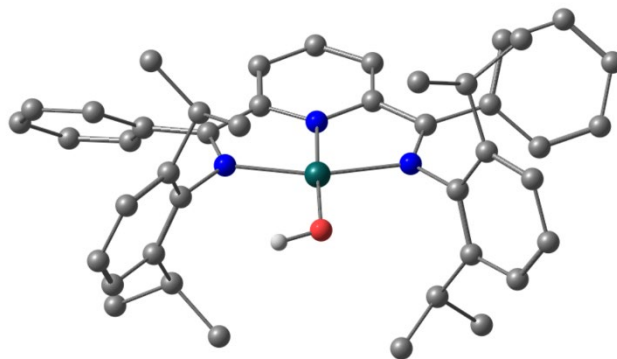

|   |            |            |            |
|---|------------|------------|------------|
| H | -0.5590738 | 4.8114615  | -2.6633564 |
| C | 1.8853263  | 0.1300333  | -3.8377795 |
| C | 2.7975658  | -0.0609076 | -6.4963368 |
| C | 2.7959082  | -0.8739476 | -4.2185023 |
| C | 1.4407188  | 1.0347161  | -4.8169300 |
| C | 1.8943157  | 0.9400310  | -6.1307781 |
| C | 3.2462203  | -0.9682783 | -5.5343096 |
| H | 3.1234097  | -1.6062681 | -3.4795270 |
| H | 0.7329180  | 1.8151007  | -4.5459591 |
| H | 1.5370775  | 1.6537723  | -6.8745764 |
| H | 3.9411162  | -1.7627135 | -5.8108668 |
| H | 3.1466291  | -0.1360057 | -7.5272017 |
| C | 1.7728479  | -0.1991075 | 3.5966809  |
| C | 2.6509219  | -0.1092830 | 6.2700466  |
| C | 2.6933871  | 0.7768646  | 4.0205333  |
| C | 1.3007162  | -1.1285086 | 4.5382356  |
| C | 1.7384231  | -1.0842828 | 5.8599413  |
| C | 3.1262657  | 0.8223071  | 5.3450674  |
| H | 3.0445015  | 1.5255184  | 3.3089644  |
| H | 0.5814925  | -1.8853929 | 4.2322938  |
| H | 1.3594717  | -1.8155419 | 6.5754200  |
| H | 3.8293322  | 1.5963321  | 5.6567744  |
| H | 2.9866784  | -0.0731454 | 7.3074646  |

**Cpd. 13:** Xmol xyz coordinates (Å) and total energy in Hartree of DFT PBE-D3BJ/def2-TZVP optimized geometry (gas phase); Ir: def2-ECP (60e).

107

Energy = -2166.140309087

|    |            |            |            |
|----|------------|------------|------------|
| H  | -3.0151880 | -1.5013066 | 2.1919369  |
| C  | -2.7873124 | -0.6834868 | 1.5116189  |
| C  | -2.1599776 | 1.4705075  | -0.1421283 |
| C  | -1.4527362 | -0.3702769 | 1.2367483  |
| C  | -3.8073868 | 0.0564336  | 0.9127734  |
| C  | -3.4973383 | 1.1279284  | 0.0742753  |
| N  | -1.1644693 | 0.7033421  | 0.4228157  |
| H  | -4.8486897 | -0.2015418 | 1.1024311  |
| H  | -4.2816156 | 1.7020767  | -0.4147327 |
| C  | -0.2465288 | -0.9901807 | 1.7678141  |
| C  | -1.6192900 | 2.5437047  | -0.9646099 |
| N  | -0.2870461 | 2.5303339  | -1.0604027 |
| N  | 0.8858892  | -0.3978179 | 1.3779365  |
| Ir | 0.6406224  | 1.1301020  | 0.0674690  |
| O  | 2.6855273  | 1.5831821  | -0.3780374 |
| C  | 3.3195766  | 2.9085731  | -0.2956143 |
| C  | 3.6778173  | 0.5764519  | -0.7809794 |
| C  | 4.6653081  | 2.7348396  | -0.9740442 |
| C  | 5.0179913  | 1.2773496  | -0.6527777 |
| H  | 3.5633240  | -0.2878623 | -0.1209608 |
| H  | 3.4159229  | 3.1588339  | 0.7701805  |
| H  | 5.4064888  | 3.4496577  | -0.5947799 |
| H  | 2.6593559  | 3.6273111  | -0.7883283 |
| H  | 4.5660032  | 2.8849610  | -2.0589373 |
| H  | 5.3979501  | 1.1842359  | 0.3752356  |
| H  | 5.7650567  | 0.8546145  | -1.3361485 |
| H  | 3.4486780  | 0.2901634  | -1.8182412 |
| C  | 2.1637678  | -0.8473183 | 1.8449788  |
| C  | 4.7181391  | -1.5895929 | 2.6506539  |
| C  | 2.6809884  | -2.0878684 | 1.4103858  |
| C  | 2.9114461  | 0.0427614  | 2.6570955  |
| C  | 4.1890082  | -0.3638975 | 3.0547832  |
| C  | 3.9729338  | -2.4304782 | 1.8312585  |
| H  | 4.7851488  | 0.2909785  | 3.6895368  |
| H  | 4.4008565  | -3.3788998 | 1.5038378  |
| H  | 5.7177748  | -1.8845488 | 2.9722418  |
| C  | 0.4175964  | 3.5245300  | -1.8102634 |
| C  | 1.9370599  | 5.3815004  | -3.2038094 |
| C  | 0.4888766  | 4.8471683  | -1.3202088 |
| C  | 1.1172075  | 3.1018591  | -2.9665297 |
| C  | 1.8652995  | 4.0630977  | -3.6535850 |
| C  | 1.2649122  | 5.7599477  | -2.0456759 |
| H  | 2.4084479  | 3.7765169  | -4.5537527 |
| H  | 1.3466467  | 6.7873195  | -1.6889917 |
| H  | 2.5285979  | 6.1134305  | -3.7553320 |
| C  | 1.9375325  | -3.0224345 | 0.4684234  |
| H  | 0.8985541  | -2.6790477 | 0.3856760  |
| C  | 1.9068360  | -4.4613318 | 1.0026838  |
| H  | 2.9081255  | -4.9154642 | 0.9986398  |
| H  | 1.2621745  | -5.0857296 | 0.3681865  |
| H  | 1.5196665  | -4.4998700 | 2.0289704  |
| C  | 2.5351034  | -2.9753734 | -0.9478534 |
| H  | 2.4326947  | -1.9764054 | -1.3942799 |
| H  | 2.0154207  | -3.6903287 | -1.6016724 |
| H  | 3.6022752  | -3.2409866 | -0.9381143 |
| C  | 1.0655748  | 1.6537800  | -3.4321598 |
| H  | 1.0865626  | 1.0316543  | -2.5150998 |
| C  | -0.2458211 | 1.3105717  | -4.1577698 |
| H  | -0.3818139 | 1.9476060  | -5.0447214 |
| H  | -1.1228250 | 1.4296765  | -3.5085006 |
| H  | -0.2265651 | 0.2645325  | -4.4954722 |
| C  | 2.2603710  | 1.2520570  | -4.3010910 |
| H  | 3.2193772  | 1.5339013  | -3.8425883 |
| H  | 2.2168453  | 1.7168255  | -5.2970028 |
| H  | 2.2607868  | 0.1637755  | -4.4542986 |
| C  | -0.1589029 | 5.2808673  | -0.0147482 |
| H  | -0.8981782 | 4.5235225  | 0.2741404  |
| C  | 0.8816329  | 5.3341256  | 1.1167578  |
| H  | 1.3170770  | 4.3412122  | 1.2994954  |
| H  | 0.4111230  | 5.6739290  | 2.0507370  |
| H  | 1.6971311  | 6.0312682  | 0.8744796  |
| C  | -0.9052121 | 6.6137850  | -0.1498325 |
| H  | -0.2163890 | 7.4516045  | -0.3266894 |

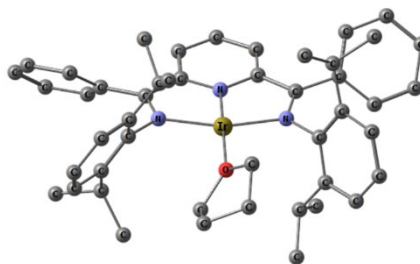

|   |            |            |            |
|---|------------|------------|------------|
| H | -1.4545348 | 6.8325719  | 0.7768087  |
| H | -1.6274836 | 6.5847933  | -0.9769817 |
| C | 2.3473143  | 1.3922302  | 3.0788746  |
| H | 1.8177705  | 1.7989658  | 2.1907652  |
| C | 1.2913583  | 1.2755375  | 4.1899416  |
| H | 1.7192578  | 0.8100469  | 5.0905035  |
| H | 0.4204738  | 0.6860768  | 3.8757959  |
| H | 0.9284702  | 2.2751741  | 4.4695138  |
| C | 3.4201715  | 2.4027904  | 3.4920629  |
| H | 4.2332706  | 2.4722880  | 2.7551905  |
| H | 3.8714922  | 2.1461827  | 4.4622891  |
| H | 2.9695273  | 3.3992515  | 3.5999426  |
| C | -2.5020560 | 3.5618682  | -1.5651831 |
| C | -4.1944945 | 5.5587260  | -2.5986619 |
| C | -3.5023947 | 4.1474223  | -0.7634890 |
| C | -2.3622294 | 4.0034177  | -2.8927550 |
| C | -3.2061477 | 4.9870604  | -3.4028716 |
| C | -4.3359632 | 5.1390613  | -1.2744171 |
| H | -3.5991830 | 3.8508037  | 0.2816405  |
| H | -1.5951324 | 3.5731275  | -3.5320586 |
| H | -3.0886932 | 5.3097254  | -4.4379337 |
| H | -5.0931642 | 5.5911345  | -0.6327490 |
| H | -4.8495504 | 6.3321347  | -3.0013220 |
| C | -0.3297129 | -2.1658364 | 2.6558978  |
| C | -0.5345040 | -4.4534535 | 4.2816401  |
| C | 0.3928107  | -2.2564045 | 3.8588821  |
| C | -1.1492657 | -3.2481451 | 2.2787939  |
| C | -1.2458798 | -4.3824158 | 3.0818510  |
| C | 0.2835549  | -3.3879216 | 4.6645252  |
| H | 1.0358343  | -1.4369472 | 4.1711143  |
| H | -1.6825282 | -3.2158156 | 1.3276592  |
| H | -1.8717906 | -5.2169913 | 2.7640542  |
| H | 0.8431396  | -3.4360746 | 5.5992648  |
| H | -0.6128421 | -5.3388982 | 4.9133068  |



Cpd. Rh(THF)\*: Xmol xyz coordinates (Å) and total energy in Hartree of DFT PBE-D3BJ/def2-TZVP optimized geometry (gas phase); Ir: def2-ECP (60e).

107

Energy = -2172.329767009

|    |            |            |            |
|----|------------|------------|------------|
| H  | -3.0061461 | -1.4430224 | 2.2793130  |
| C  | -2.7809875 | -0.6288545 | 1.5934822  |
| C  | -2.1495733 | 1.5047418  | -0.0751035 |
| C  | -1.4482315 | -0.3247150 | 1.2989970  |
| C  | -3.8020775 | 0.1162782  | 1.0030188  |
| C  | -3.4896978 | 1.1776133  | 0.1529642  |
| N  | -1.1584419 | 0.7402394  | 0.4852312  |
| H  | -4.8436985 | -0.1301963 | 1.2065054  |
| H  | -4.2728316 | 1.7550830  | -0.3341527 |
| C  | -0.2425278 | -0.9730671 | 1.8095460  |
| C  | -1.6133987 | 2.5707098  | -0.9179791 |
| N  | -0.2897542 | 2.5572196  | -1.0206154 |
| N  | 0.8854000  | -0.3863076 | 1.4271087  |
| Rh | 0.6460696  | 1.1644990  | 0.1284629  |
| O  | 2.7094299  | 1.6444727  | -0.2886829 |
| C  | 3.3079618  | 2.9795462  | -0.1917977 |
| C  | 3.7260564  | 0.6720357  | -0.6958579 |
| C  | 4.6839878  | 2.8439193  | -0.8214670 |
| C  | 5.0516499  | 1.3882915  | -0.5097513 |
| H  | 3.6102578  | -0.2174643 | -0.0696985 |
| H  | 3.3615254  | 3.2417419  | 0.8751362  |
| H  | 5.3959499  | 3.5675339  | -0.4049255 |
| H  | 2.6519900  | 3.6842290  | -0.7116874 |
| H  | 4.6233229  | 3.0072993  | -1.9074351 |
| H  | 5.3949501  | 1.2841611  | 0.5299868  |
| H  | 5.8298949  | 0.9884081  | -1.1717667 |
| H  | 3.5375002  | 0.4119412  | -1.7485930 |
| C  | 2.1633399  | -0.8644777 | 1.8431017  |
| C  | 4.7227335  | -1.6659093 | 2.5720430  |
| C  | 2.6587844  | -2.0930249 | 1.3501245  |
| C  | 2.9394278  | -0.0125115 | 2.6691623  |
| C  | 4.2180012  | -0.4483792 | 3.0289241  |
| C  | 3.9529963  | -2.4666707 | 1.7344020  |
| H  | 4.8350280  | 0.1766391  | 3.6739797  |
| H  | 4.3645085  | -3.4062085 | 1.3629852  |
| H  | 5.7239542  | -1.9850337 | 2.8644596  |
| C  | 0.4176827  | 3.5167290  | -1.8030741 |
| C  | 1.9464249  | 5.3055289  | -3.2795995 |
| C  | 0.4866377  | 4.8634656  | -1.3802682 |
| C  | 1.1269616  | 3.0400172  | -2.9340888 |
| C  | 1.8778998  | 3.9661983  | -3.6638787 |
| C  | 1.2670838  | 5.7393685  | -2.1454870 |
| H  | 2.4253012  | 3.6359448  | -4.5463724 |
| H  | 1.3456023  | 6.7834275  | -1.8393015 |
| H  | 2.5401735  | 6.0101065  | -3.8634169 |
| C  | 1.8879892  | -2.9716672 | 0.3772810  |
| H  | 0.8502957  | -2.6167154 | 0.3342214  |
| C  | 1.8543924  | -4.4371560 | 0.8320430  |
| H  | 2.8525952  | -4.8957259 | 0.7895806  |
| H  | 1.1971760  | -5.0222097 | 0.1732369  |
| H  | 1.4807082  | -4.5294246 | 1.8602949  |
| C  | 2.4582352  | -2.8484079 | -1.0458932 |
| H  | 2.3689951  | -1.8207301 | -1.4257195 |
| H  | 1.9118573  | -3.5108659 | -1.7326469 |
| H  | 3.5201256  | -3.1339922 | -1.0744117 |
| C  | 1.0743475  | 1.5719245  | -3.3306080 |
| H  | 1.1052042  | 0.9931123  | -2.3843423 |
| C  | -0.2417477 | 1.1930023  | -4.0299134 |
| H  | -0.3807566 | 1.7840169  | -4.9477768 |
| H  | -1.1155712 | 1.3465327  | -3.3837747 |
| H  | -0.2250457 | 0.1309814  | -4.3140056 |
| C  | 2.2604854  | 1.1315094  | -4.1926306 |
| H  | 3.2237051  | 1.4404718  | -3.7623299 |
| H  | 2.2009834  | 1.5450767  | -5.2104421 |
| H  | 2.2638432  | 0.0368260  | -4.2905080 |
| C  | -0.1739470 | 5.3683287  | -0.1073072 |
| H  | -0.8849602 | 4.6080892  | 0.2403853  |
| C  | 0.8633246  | 5.5479461  | 1.0138381  |
| H  | 1.3380641  | 4.5907972  | 1.2726563  |
| H  | 0.3800609  | 5.9420411  | 1.9195290  |
| H  | 1.6527572  | 6.2540589  | 0.7166531  |
| C  | -0.9664601 | 6.6609221  | -0.3433827 |
| H  | -0.3047272 | 7.5040489  | -0.5879611 |

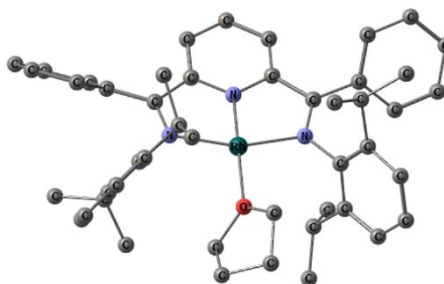

|   |            |            |            |
|---|------------|------------|------------|
| H | -1.5220154 | 6.9340566  | 0.5648930  |
| H | -1.6864864 | 6.5434990  | -1.1640694 |
| C | 2.3968418  | 1.3280141  | 3.1423609  |
| H | 1.8442542  | 1.7604203  | 2.2820231  |
| C | 1.3778911  | 1.1871045  | 4.2854574  |
| H | 1.8338972  | 0.6944123  | 5.1574628  |
| H | 0.4928156  | 0.6111236  | 3.9861227  |
| H | 1.0312359  | 2.1805201  | 4.6046421  |
| C | 3.4909677  | 2.3193249  | 3.5474387  |
| H | 4.2779851  | 2.4024435  | 2.7845786  |
| H | 3.9720841  | 2.0321967  | 4.4943881  |
| H | 3.0531998  | 3.3160888  | 3.6986656  |
| C | -2.5087960 | 3.5616949  | -1.5489405 |
| C | -4.2272546 | 5.4934912  | -2.6570663 |
| C | -3.5096903 | 4.1706118  | -0.7663395 |
| C | -2.3788021 | 3.9473589  | -2.8945737 |
| C | -3.2368624 | 4.8984411  | -3.4420186 |
| C | -4.3564195 | 5.1312462  | -1.3146841 |
| H | -3.5974276 | 3.9184144  | 0.2912895  |
| H | -1.6094459 | 3.4979353  | -3.5181333 |
| H | -3.1289419 | 5.1773462  | -4.4907538 |
| H | -5.1141353 | 5.6036871  | -0.6885484 |
| H | -4.8927887 | 6.2418111  | -3.0889120 |
| C | -0.3336877 | -2.1782088 | 2.6587968  |
| C | -0.5377226 | -4.5220882 | 4.2000704  |
| C | 0.4129745  | -2.3241305 | 3.8409643  |
| C | -1.1762227 | -3.2336912 | 2.2578630  |
| C | -1.2723212 | -4.3963222 | 3.0192229  |
| C | 0.3034248  | -3.4832949 | 4.6057789  |
| H | 1.0764961  | -1.5268957 | 4.1680482  |
| H | -1.7283305 | -3.1584391 | 1.3200875  |
| H | -1.9169332 | -5.2095626 | 2.6838463  |
| H | 0.8815778  | -3.5752665 | 5.5258719  |
| H | -0.6157183 | -5.4298358 | 4.7994944  |

**Cpd. Ir(OH<sub>2</sub>)<sup>+</sup>:** Xmol xyz coordinates (Å) and total energy in Hartree of DFT PBE-D3BJ/def2-TZVP optimized geometry (gas phase); Ir: def2-ECP (60e). The Ir-O distance (in Å) is shown.

97

Energy = -2010.261793836

|    |            |            |            |
|----|------------|------------|------------|
| H  | -2.7352105 | -1.3090560 | 2.1748422  |
| C  | -2.4933165 | -0.5040916 | 1.4834936  |
| C  | -1.8455301 | 1.6166373  | -0.2213275 |
| C  | -1.1551131 | -0.2061242 | 1.2131190  |
| C  | -3.5025345 | 0.2334826  | 0.8600159  |
| C  | -3.1851523 | 1.2844825  | -0.0039850 |
| N  | -0.8668119 | 0.8542511  | 0.3792851  |
| H  | -4.5467202 | -0.0129929 | 1.0492674  |
| H  | -3.9670275 | 1.8484420  | -0.5088649 |
| C  | 0.0573533  | -0.8416428 | 1.7296855  |
| C  | -1.2759305 | 2.6762052  | -1.0545593 |
| N  | 0.0568389  | 2.6416587  | -1.1226691 |
| N  | 1.1797824  | -0.2251112 | 1.3519835  |
| Ir | 0.9346994  | 1.2712537  | 0.0472615  |
| O  | 2.9981469  | 1.6849336  | -0.3258551 |
| H  | 3.2249630  | 2.5963876  | -0.5928395 |
| H  | 3.6000644  | 1.3948851  | 0.3943304  |
| C  | 2.5025036  | -0.6402587 | 1.6988033  |
| C  | 5.1510805  | -1.2844246 | 2.2456932  |
| C  | 3.0525515  | -1.8049078 | 1.1216192  |
| C  | 3.2721883  | 0.2455524  | 2.5008109  |
| C  | 4.6011478  | -0.1119183 | 2.7636734  |
| C  | 4.3857296  | -2.1072881 | 1.4253911  |
| H  | 5.2141311  | 0.5364759  | 3.3894293  |
| H  | 4.8351501  | -3.0025392 | 0.9937452  |
| H  | 6.1860437  | -1.5454374 | 2.4694231  |
| C  | 0.8504666  | 3.5837848  | -1.8501508 |
| C  | 2.5130232  | 5.3293953  | -3.2268709 |
| C  | 0.9806589  | 4.9090326  | -1.3809774 |
| C  | 1.5858522  | 3.0942532  | -2.9596894 |
| C  | 2.4048099  | 4.0016457  | -3.6400662 |
| C  | 1.8229774  | 5.7663599  | -2.1001177 |
| H  | 2.9716229  | 3.6623754  | -4.5070040 |
| H  | 1.9428984  | 6.7967629  | -1.7630156 |
| H  | 3.1542656  | 6.0198594  | -3.7762529 |
| C  | 2.2918770  | -2.6591068 | 0.1230115  |
| H  | 1.2363989  | -2.3581635 | 0.1418625  |
| C  | 2.3474844  | -4.1524656 | 0.4666405  |
| H  | 3.3702912  | -4.5493439 | 0.3944323  |
| H  | 1.7249932  | -4.7243911 | -0.2358527 |
| H  | 1.9792549  | -4.3422818 | 1.4838539  |
| C  | 2.8120049  | -2.3838598 | -1.2984820 |
| H  | 2.7178361  | -1.3180833 | -1.5542137 |
| H  | 2.2394378  | -2.9662131 | -2.0346875 |
| H  | 3.8711203  | -2.6648285 | -1.3937977 |
| C  | 1.4800889  | 1.6396059  | -3.3942833 |
| H  | 1.3334814  | 1.0444383  | -2.4700515 |
| C  | 0.2483876  | 1.3851971  | -4.2783054 |
| H  | 0.2808867  | 2.0067398  | -5.1855621 |
| H  | -0.6905767 | 1.5969211  | -3.7487679 |
| H  | 0.2189900  | 0.3317491  | -4.5913014 |
| C  | 2.7472645  | 1.1154596  | -4.0733562 |
| H  | 3.6443200  | 1.3150845  | -3.4705058 |
| H  | 2.8977282  | 1.5585372  | -5.0690518 |
| H  | 2.6688280  | 0.0284204  | -4.2140435 |
| C  | 0.3238733  | 5.3895506  | -0.0986553 |
| H  | -0.4382765 | 4.6567629  | 0.1971516  |
| C  | 1.3630882  | 5.4343754  | 1.0347263  |
| H  | 1.8024987  | 4.4391065  | 1.2040607  |
| H  | 0.8955976  | 5.7611036  | 1.9749345  |
| H  | 2.1765285  | 6.1356024  | 0.7981019  |
| C  | -0.3838295 | 6.7388529  | -0.2690571 |
| H  | 0.3274692  | 7.5492575  | -0.4806729 |
| H  | -0.9176886 | 7.0045363  | 0.6543698  |
| H  | -1.1145592 | 6.7034919  | -1.0886275 |
| C  | 2.6679494  | 1.5195182  | 3.0800441  |
| H  | 1.9443434  | 1.8975259  | 2.3290071  |
| C  | 1.8626205  | 1.2477119  | 4.3605137  |
| H  | 2.4935481  | 0.7776752  | 5.1298317  |
| H  | 1.0019014  | 0.5924240  | 4.1726056  |
| H  | 1.4745965  | 2.1908355  | 4.7711509  |
| C  | 3.6976553  | 2.6268242  | 3.3236074  |
| H  | 4.3223038  | 2.8195450  | 2.4376002  |

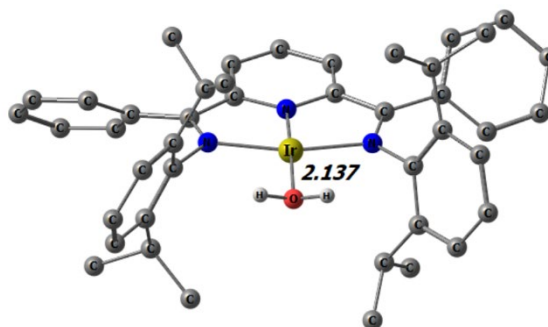

|   |            |            |            |
|---|------------|------------|------------|
| H | 4.3722742  | 2.3892989  | 4.1584237  |
| H | 3.1818833  | 3.5624870  | 3.5798346  |
| C | -2.1184401 | 3.7092049  | -1.6797901 |
| C | -3.7134356 | 5.7544332  | -2.7683395 |
| C | -3.1400934 | 4.3103820  | -0.9173038 |
| C | -1.9061607 | 4.1596038  | -2.9952934 |
| C | -2.7026722 | 5.1673608  | -3.5331632 |
| C | -3.9252925 | 5.3266137  | -1.4560673 |
| H | -3.2905225 | 4.0078152  | 0.1196839  |
| H | -1.1206609 | 3.7158659  | -3.6031936 |
| H | -2.5311570 | 5.4966860  | -4.5584974 |
| H | -4.7006265 | 5.7909435  | -0.8456284 |
| H | -4.3315322 | 6.5463635  | -3.1927598 |
| C | 0.0135931  | -2.0785113 | 2.5262804  |
| C | -0.0510076 | -4.5127499 | 3.9352959  |
| C | 0.8305326  | -2.2754072 | 3.6546405  |
| C | -0.8304184 | -3.1289177 | 2.1127702  |
| C | -0.8565319 | -4.3355085 | 2.8081771  |
| C | 0.7901259  | -3.4789688 | 4.3543015  |
| H | 1.4938535  | -1.4824493 | 3.9924488  |
| H | -1.4369777 | -3.0134151 | 1.2139140  |
| H | -1.5026354 | -5.1432927 | 2.4627796  |
| H | 1.4215245  | -3.6097544 | 5.2336423  |
| H | -0.0752194 | -5.4554695 | 4.4829765  |

**Cpd. Ir(MeOH)<sup>+</sup>:** Xmol xyz coordinates (Å) and total energy in Hartree of DFT PBE-D3BJ/def2-TZVP optimized geometry (gas phase); Ir: def2-ECP (60e). The Ir-O distance (in Å) is shown.

100

Energy = -2049.521412916

|    |            |            |            |
|----|------------|------------|------------|
| H  | -2.8600074 | -1.2424520 | 2.0446459  |
| C  | -2.6207973 | -0.4266375 | 1.3652071  |
| C  | -1.9716034 | 1.7208833  | -0.3008768 |
| C  | -1.2831049 | -0.1072742 | 1.1178380  |
| C  | -3.6304506 | 0.3050035  | 0.7367707  |
| C  | -3.3104546 | 1.3719297  | -0.1056458 |
| N  | -0.9879888 | 0.9593948  | 0.2981359  |
| H  | -4.6743751 | 0.0436975  | 0.9063416  |
| H  | -4.0901782 | 1.9371211  | -0.6124816 |
| C  | -0.0754530 | -0.7221012 | 1.6577036  |
| C  | -1.4140725 | 2.7943753  | -1.1184838 |
| N  | -0.0804371 | 2.7670417  | -1.1915284 |
| N  | 1.0521820  | -0.1093513 | 1.2896642  |
| Ir | 0.8130869  | 1.4094241  | -0.0216782 |
| O  | 2.7762814  | 2.0943016  | -0.4835730 |
| H  | 2.6985770  | 2.7325214  | -1.2302163 |
| C  | 4.0141222  | 1.3412871  | -0.6099861 |
| H  | 4.8488847  | 2.0513219  | -0.6677356 |
| H  | 4.1060910  | 0.7253810  | 0.2882952  |
| H  | 3.9844070  | 0.7048633  | -1.5039731 |
| C  | 2.3405355  | -0.5509635 | 1.7286292  |
| C  | 4.8995806  | -1.2880830 | 2.5069813  |
| C  | 2.8907436  | -1.7405062 | 1.2060871  |
| C  | 3.0624436  | 0.3061995  | 2.5944534  |
| C  | 4.3431212  | -0.1006935 | 2.9829603  |
| C  | 4.1849549  | -2.0842447 | 1.6163835  |
| H  | 4.9216824  | 0.5287169  | 3.6588116  |
| H  | 4.6402483  | -2.9952274 | 1.2262256  |
| H  | 5.9012988  | -1.5842880 | 2.8207793  |
| C  | 0.7018823  | 3.7175364  | -1.9186653 |
| C  | 2.3719467  | 5.4762111  | -3.2756800 |
| C  | 0.8461318  | 5.0343427  | -1.4285812 |
| C  | 1.4286848  | 3.2419039  | -3.0440854 |
| C  | 2.2545192  | 4.1570685  | -3.7109639 |
| C  | 1.6868591  | 5.8984252  | -2.1401595 |
| H  | 2.8139603  | 3.8300584  | -4.5870908 |
| H  | 1.8139670  | 6.9223287  | -1.7863694 |
| H  | 3.0170823  | 6.1712397  | -3.8144475 |
| C  | 2.1708979  | -2.5887715 | 0.1710441  |
| H  | 1.1107741  | -2.3048062 | 0.1680535  |
| C  | 2.2367486  | -4.0868549 | 0.4909025  |
| H  | 3.2614948  | -4.4775951 | 0.4144707  |
| H  | 1.6190160  | -4.6516721 | -0.2215505 |
| H  | 1.8673239  | -4.2941386 | 1.5043562  |
| C  | 2.7147190  | -2.2885240 | -1.2357500 |
| H  | 2.5522301  | -1.2333049 | -1.5007990 |
| H  | 2.2027863  | -2.9088846 | -1.9854922 |
| H  | 3.7925294  | -2.4997426 | -1.2981998 |
| C  | 1.2979404  | 1.7993263  | -3.5181859 |
| H  | 1.2063268  | 1.1744284  | -2.6069539 |
| C  | 0.0150629  | 1.5678678  | -4.3334929 |
| H  | -0.0099082 | 2.2207453  | -5.2188139 |
| H  | -0.8905867 | 1.7521457  | -3.7409142 |
| H  | -0.0262025 | 0.5261004  | -4.6817948 |
| C  | 2.5160964  | 1.3038313  | -4.3021297 |
| H  | 3.4613320  | 1.5094191  | -3.7781679 |
| H  | 2.5798408  | 1.7651168  | -5.2985567 |
| H  | 2.4425664  | 0.2181549  | -4.4535527 |
| C  | 0.2023909  | 5.4967171  | -0.1338450 |
| H  | -0.5468494 | 4.7521224  | 0.1653330  |
| C  | 1.2587004  | 5.5441872  | 0.9837641  |
| H  | 1.7314678  | 4.5607292  | 1.1228580  |
| H  | 0.7949265  | 5.8395786  | 1.9360237  |
| H  | 2.0477176  | 6.2736394  | 0.7501100  |
| C  | -0.5223228 | 6.8393053  | -0.2859650 |
| H  | 0.1777441  | 7.6582666  | -0.5026396 |
| H  | -1.0438273 | 7.0932678  | 0.6476620  |
| H  | -1.2659788 | 6.8023277  | -1.0938454 |
| C  | 2.4761527  | 1.6304307  | 3.0629124  |
| H  | 1.8374062  | 2.0001844  | 2.2346062  |
| C  | 1.5584447  | 1.4654125  | 4.2841243  |
| H  | 2.1042408  | 1.0194498  | 5.1294476  |
| H  | 0.6889310  | 0.8313234  | 4.0638046  |

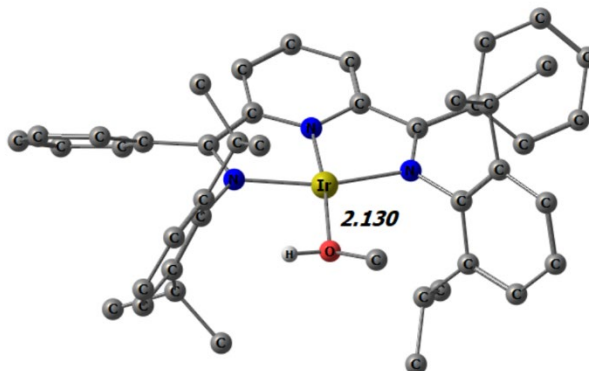

|   |            |            |            |
|---|------------|------------|------------|
| H | 1.1785320  | 2.4451772  | 4.6079400  |
| C | 3.5377960  | 2.7013194  | 3.3274205  |
| H | 4.2240935  | 2.8133373  | 2.4759106  |
| H | 4.1379701  | 2.4782372  | 4.2217133  |
| H | 3.0501645  | 3.6709144  | 3.4999250  |
| C | -2.2629177 | 3.8354928  | -1.7216070 |
| C | -3.8707449 | 5.9012725  | -2.7541680 |
| C | -3.2836436 | 4.4151162  | -0.9410255 |
| C | -2.0587609 | 4.3190085  | -3.0266066 |
| C | -2.8609190 | 5.3367719  | -3.5366778 |
| C | -4.0751555 | 5.4406087  | -1.4519076 |
| H | -3.4287525 | 4.0867906  | 0.0887766  |
| H | -1.2761373 | 3.8928827  | -3.6502751 |
| H | -2.6949403 | 5.6912002  | -4.5545468 |
| H | -4.8497025 | 5.8866858  | -0.8269970 |
| H | -4.4936442 | 6.7008339  | -3.1566912 |
| C | -0.1384141 | -1.9411945 | 2.4849070  |
| C | -0.2597746 | -4.3349424 | 3.9569667  |
| C | 0.6007605  | -2.0894341 | 3.6719883  |
| C | -0.9353412 | -3.0174856 | 2.0465866  |
| C | -0.9891789 | -4.2048958 | 2.7731357  |
| C | 0.5320509  | -3.2737085 | 4.4021997  |
| H | 1.2262624  | -1.2749598 | 4.0297765  |
| H | -1.4835698 | -2.9365156 | 1.1068941  |
| H | -1.5971092 | -5.0336405 | 2.4085907  |
| H | 1.1034011  | -3.3673522 | 5.3262441  |
| H | -0.3052951 | -5.2622191 | 4.5291416  |

## References

- Poater, A. Versatile deprotonated NHC: C,N-bridged dinuclear iridium and rhodium complexes. *Beilstein J. Org. Chem.* **2016**, *12*, 117-124, doi:10.3762/bjoc.12.13.
- Vaughan, B.A.; Webster-Gardiner, M.S.; Cundari, T.R.; Gunnoe, T.B. Organic chemistry. A rhodium catalyst for single-step styrene production from benzene and ethylene. *Science* **2015**, *348*, 421-424, doi:10.1126/science.aaa2260.
- Lukmantara, A.Y.; Kalinowski, D.S.; Kumar, N.; Richardson, D.R. Synthesis and biological evaluation of 2-benzoylpyridine thiosemicarbazones in a dimeric system: structure-activity relationship studies on their anti-proliferative and iron chelation efficacy. *J. Inorg. Biochem.* **2014**, *141*, 43-54, doi:10.1016/j.jinorgbio.2014.07.020.
- Zhang, Z.; Wang, Q.; Jiang, H.; Chen, A.; Zou, C. Bidentate Pyridyl-Amido Hafnium Catalysts for Copolymerization of Ethylene with 1-Octene and Norbornene. *Eur. J. Inorg. Chem.* **2022**, *26*, doi:10.1002/ejic.202200725.
- Kleigrew, N.; Steffen, W.; Blomker, T.; Kehr, G.; Frohlich, R.; Wibbeling, B.; Erker, G.; Wasilke, J.C.; Wu, G.; Bazan, G.C. Chelate bis(imino)pyridine cobalt complexes: synthesis, reduction, and evidence for the generation of ethene polymerization catalysts by Li<sup>+</sup> cation activation. *J. Am. Chem. Soc.* **2005**, *127*, 13955-13968, doi:10.1021/ja052129k.
- Okamoto, I.; Terashima, M.; Masu, H.; Nabeta, M.; Ono, K.; Morita, N.; Katagiri, K.; Azumaya, I.; Tamura, O. Acid-induced conformational alteration of cis-preferential aromatic amides bearing N-methyl-N-(2-pyridyl) moiety. *Tetrahedron* **2011**, *67*, 8536-8543, doi:10.1016/j.tet.2011.08.085.
- Nückel, S.; Burger, P. Transition Metal Complexes with Sterically Demanding Ligands, 3.1 Synthetic Access to Square-Planar Terdentate Pyridine-Diimine Rhodium(I) and Iridium(I) Methyl Complexes: Successful Detour via Reactive Triflate and Methoxide Complexes. *Organometallics* **2001**, *20*, 4345-4359, doi:10.1021/om010185y.
- Wark, T.A.; Stephan, D.W. Early metal thiolato species as metalloligands in the formation of early/late heterobimetallic complexes: syntheses and molecular structures of Cp<sub>2</sub>Ti(SMe)<sub>2</sub>, Cp<sub>2</sub>V(SMe)<sub>2</sub>, (Cp<sub>2</sub>Ti(μ-SMe)<sub>2</sub>)<sub>2</sub>Ni and (Ni(μ-SMe)<sub>2</sub>)<sub>6</sub>. *Organometallics* **1989**, *8*, 2836-2843, doi:10.1021/om00114a017.
- Nishiyama, Y.; Katsuura, A.; Okamoto, Y.; Hamanaka, S. Bis(acyl) Diselenides as Convenient Acylating Reagents. *Chem. Lett.* **2002**, *18*, 1825-1826, doi:10.1246/cl.1989.1825.
- Sheldrick, G.M. A short history of SHELX. *Acta Crystallogr A* **2008**, *64*, 112-122, doi:10.1107/S0108767307043930.
- Dolomanov, O.V.; Bourhis, L.J.; Gildea, R.J.; Howard, J.A.K.; Puschmann, H. OLEX2: a complete structure solution, refinement and analysis program. *J. Appl. Crystallogr.* **2009**, *42*, 339-341, doi:10.1107/s0021889808042726.
- Balasubramani, S.G.; Chen, G.P.; Coriani, S.; Diedenhofen, M.; Frank, M.S.; Franzke, Y.J.; Furche, F.; Grotjahn, R.; Harding, M.E.; Hattig, C., et al. TURBOMOLE: Modular program suite for ab initio quantum-chemical and condensed-matter simulations. *J. Chem. Phys.* **2020**, *152*, 184107, doi:10.1063/5.0004635.
- Kästner, J.; Carr, J.M.; Keal, T.W.; Thiel, W.; Wander, A.; Sherwood, P. DL-FIND: an open-source geometry optimizer for atomistic simulations. *J. Phys. Chem. A* **2009**, *113*, 11856-11865, doi:10.1021/jp9028968.
- ChemShell, a Computational Chemistry Shell, [www.chemshell.org](http://www.chemshell.org).
- Nagy, P.R.; Kallay, M. Approaching the Basis Set Limit of CCSD(T) Energies for Large Molecules with Local Natural Orbital Coupled-Cluster Methods. *J. Chem. Theory Comput.* **2019**, *15*, 5275-5298, doi:10.1021/acs.jctc.9b00511.
- Lu, T.; Chen, F. Multiwfn: a multifunctional wavefunction analyzer. *J. Comput. Chem.* **2012**, *33*, 580-592, doi:10.1002/jcc.22885.
- Lefebvre, C.; Khartabil, H.; Boisson, J.C.; Contreras-Garcia, J.; Piquemal, J.P.; Henon, E. The Independent Gradient Model: A New Approach for Probing Strong and Weak Interactions in

- Molecules from Wave Function Calculations. *ChemPhysChem* **2018**, *19*, 724-735, doi:10.1002/cphc.201701325.
18. Epifanovsky, E.; Gilbert, A.T.B.; Feng, X.; Lee, J.; Mao, Y.; Mardirossian, N.; Pokhilko, P.; White, A.F.; Coons, M.P.; Dempwolff, A.L., et al. Software for the frontiers of quantum chemistry: An overview of developments in the Q-Chem 5 package. *J. Chem. Phys.* **2021**, *155*, 084801, doi:10.1063/5.0055522.
  19. Frisch, M.J.; Trucks, G.W.; Schlegel, H.B.; Scuseria, G.E.; Robb, M.A.; Cheeseman, J.R.; Scalmani, G.; Barone, V.; Petersson, G.A.; Nakatsuji, H., et al. *Gaussian 16 Rev. C.01*, Wallingford, CT, **2016**.
  20. Salvador, P.; Ramos-Cordoba, E. *APOST-3D*, Universitat de Girona, Girona, Spain, **2012**.
  21. Glendening, E.D.; Badenhoop, J.K.; Reed, A.E.; Carpenter, J.E.; Bohmann, J.A.; Morales, C.M.; Karafiloglou, P.; Landis, C.R.; Weinhold, F. *NBO 7.0*; Theoretical Chemistry Institute, University of Wisconsin, Madison, WI 2018.
  22. Neese, F. Software update: The ORCA program system - Version 5.0. *WIREs Comput. Mol. Sci.* **2022**, *12*, doi:10.1002/wcms.1606.
  23. Gorelsky, S.I. *AOMix: Program for Molecular Orbital Analysis*, 6.92; **2018**.
  24. Gorelsky, S.I.; Lever, A.B.P. Electronic structure and spectra of ruthenium diimine complexes by density functional theory and INDO/S. Comparison of the two methods. *J. Organomet. Chem.* **2001**, *635*, 187-196, doi:10.1016/s0022-328x(01)01079-8.
  25. Ma, Q.; Werner, H.J. Scalable Electron Correlation Methods. 7. Local Open-Shell Coupled-Cluster Methods Using Pair Natural Orbitals: PNO-RCCSD and PNO-UCCSD. *J. Chem. Theory Comput.* **2020**, *16*, 3135-3151, doi:10.1021/acs.jctc.0c00192.
  26. Neese, F.; Valeev, E.F. Revisiting the Atomic Natural Orbital Approach for Basis Sets: Robust Systematic Basis Sets for Explicitly Correlated and Conventional Correlated ab initio Methods? *J. Chem. Theory Comput.* **2011**, *7*, 33-43, doi:10.1021/ct100396y.
  27. Kraka, E.; Zou, W.L.; Tao, Y.W. Decoding chemical information from vibrational spectroscopy data: Local vibrational mode theory. *Wires Comput. Mol. Sci.* **2020**, *10*, e1480, doi:10.1002/wcms.1480.
  28. Zou, W.L.; Tao, Y.W.; Freindorf, M.; Cremer, D.; Kraka, E. Local vibrational force constants - From the assessment of empirical force constants to the description of bonding in large systems. *Chem. Phys. Lett.* **2020**, *748*, 137337, doi:10.1016/j.cplett.2020.137337.
  29. Kraka, E.; Zou, W.; Tao, Y. *LMODEA(F90)*, Ver. 2.0.0 (July 15, 2020) Computational and Theoretical Chemistry Group (CATCO): SMU, Dallas, Texas 75275 USA, 2020.
